# Supplementary material for: Intake of Natural Compounds and Circulating microRNA Expression Levels: Their Relationship Investigated in Healthy Subjects With Different Dietary Habits
Source: Front Pharmacol. 2021 Jan 14;11:619200. doi: 10.3389/fphar.2020.619200 (PMC7840481; doi:10.3389/fphar.2020.619200)
Supplement: Supplementary file 2 [file table2.xlsx]

## Sheet: A_Alignment_statistics
			Low quality (Q <30)		Surviving reads		Mapped reads miRNA
ID	Diet	Raw reads	N°reads	% Raw reads	N°reads	% Surviving	N°reads	% Surviving	N°detected miRNAs
VOVP2	Omnivorous	8331321	355961	0.0427	8203717	0.9847	3478426	0.424	349
VOVP3	Omnivorous	9067592	382998	0.0422	8903375	0.9819	4582837	0.5147	362
VOVP6	Omnivorous	5989455	274751	0.0459	5932973	0.9906	2599378	0.4381	344
VOVP7	Omnivorous	9066617	363790	0.0401	9006591	0.9934	4259541	0.4729	347
VOVP8	Omnivorous	8877503	364833	0.0411	8767058	0.9876	4341984	0.4953	354
VOVP9	Vegetarian	10470847	452354	0.0432	10376951	0.991	3474729	0.3349	331
VOVP12	Vegan	7549027	311976	0.0413	7477867	0.9906	3243169	0.4337	357
VOVP14	Vegan	11213152	483096	0.0431	11110448	0.9908	4529145	0.4076	367
VOVP18	Vegan	7205138	295006	0.0409	7066109	0.9807	2357851	0.3337	351
VOVP24	Vegetarian	8259435	332417	0.0402	8138512	0.9854	4148778	0.5098	352
VOVP32	Vegetarian	8995280	392240	0.0436	8791707	0.9774	3736542	0.425	352
VOVP34	Vegetarian	7671350	338972	0.0442	7499397	0.9776	1908812	0.2545	357
VOVP41	Vegetarian	7097121	316150	0.0445	7030038	0.9905	2060193	0.2931	341
VOVP42	Omnivorous	7690267	333920	0.0434	7593106	0.9874	2516018	0.3314	342
VOVP43	Vegan	9613547	428521	0.0446	9489452	0.9871	3820574	0.4026	339
VOVP48	Vegetarian	5876134	258719	0.044	5803215	0.9876	1880087	0.324	342
VOVP50	Vegan	9819180	418907	0.0427	9570516	0.9747	2977748	0.3111	352
VOVP55	Vegan	7805889	335161	0.0429	7731622	0.9905	2184220	0.2825	339
VOVP56	Vegan	9071388	385743	0.0425	8975645	0.9894	3704576	0.4127	347
VOVP60	Vegetarian	8588624	364386	0.0424	8457303	0.9847	1793272	0.212	344
VOVP61	Vegetarian	9567818	449790	0.047	9441704	0.9868	3300779	0.3496	356
VOVP64	Vegan	7979988	380679	0.0477	7893354	0.9891	1461825	0.1852	343
VOVP71	Omnivorous	7489424	324693	0.0434	7421930	0.991	1786671	0.2407	348
VOVP94	Omnivorous	6986298	318787	0.0456	6924317	0.9911	1825829	0.2637	343
VOVP100	Omnivorous	9109914	97718	0.0107	9067453	0.9953	2733316	0.3014	341
VOVP101	Vegetarian	7107615	95787	0.0135	7067191	0.9943	2415244	0.3418	341
VOVP102	Omnivorous	6701342	75600	0.0113	6643685	0.9914	2912073	0.4383	341
VOVP104	Omnivorous	7175668	94624	0.0132	7147426	0.9961	2868821	0.4014	343
VOVP107	Omnivorous	5634307	67406	0.012	5559702	0.9868	3536851	0.6362	349
VOVP111	Vegetarian	6581174	81099	0.0123	6524257	0.9914	2480630	0.3802	358
VOVP113	Vegan	9096445	97079	0.0107	9062929	0.9963	2843894	0.3138	350
VOVP115	Omnivorous	8946553	100547	0.0112	8874722	0.992	2657100	0.2994	347
VOVP20	Vegan	5257379	63367	0.0121	5228430	0.9945	2329655	0.4456	350
VOVP26	Omnivorous	7193036	84337	0.0117	7147262	0.9936	2854463	0.3994	344
VOVP33	Omnivorous	6974497	80340	0.0115	6912017	0.991	3030201	0.4384	351
VOVP37	Vegetarian	9421482	118949	0.0126	9336720	0.991	4139475	0.4434	345
VOVP44	Vegan	6226309	72637	0.0117	6178454	0.9923	2777142	0.4495	339
VOVP47	Vegan	1716521	21456	0.0125	1700750	0.9908	679266	0.3994	358
VOVP58	Vegan	3695192	44668	0.0121	3676907	0.9951	1327231	0.361	331
VOVP59	Vegetarian	8391284	97882	0.0117	8347500	0.9948	3801913	0.4555	350
VOVP68	Vegetarian	4703268	56774	0.0121	4670714	0.9931	2110193	0.4518	342
VOVP69	Vegetarian	4127706	52743	0.0128	4094742	0.992	1489722	0.3638	347
VOVP75	Vegetarian	6730174	87345	0.013	6675543	0.9919	3410617	0.5109	343
VOVP78	Vegan	4818624	62673	0.013	4769092	0.9897	2293235	0.4809	348
VOVP88	Vegan	6636070	78293	0.0118	6575263	0.9908	2855702	0.4343	340
VOVP95	Omnivorous	7803652	101030	0.0129	7753274	0.9935	3355923	0.4328	355
VOVP96	Vegetarian	7422403	95564	0.0129	7377089	0.9939	3352609	0.4545	346
VOVP98	Vegan	5242449	77401	0.0148	5194823	0.9909	1540873	0.2966	350
VOVP105	Omnivorous	6529594	134295	0.0205671	6486324	0.993373	1930986	0.297701	340
VOVP106	Vegan	6126698	113103	0.0184607	6090320	0.994062	1672895	0.274681	345
VOVP108	Vegetarian	5423728	105173	0.0193913	5379200	0.99179	1211907	0.225295	357
VOVP109	Omnivorous	6224336	110950	0.0178252	6187136	0.994023	2131998	0.344586	348
VOVP10	Vegan	7996968	143107	0.0178952	7979103	0.997766	2803551	0.351362	347
VOVP110	Omnivorous	5712641	100311	0.0175595	5691036	0.996218	1440000	0.25303	353
VOVP112	Vegetarian	6110397	115229	0.0188579	6087001	0.996171	1611009	0.264664	346
VOVP114	Vegan	4656434	102395	0.02199	4636677	0.995757	1126121	0.242872	328
VOVP116	Omnivorous	6656605	107264	0.0161139	6619696	0.994455	1671972	0.252575	345
VOVP117	Omnivorous	7941765	165285	0.0208121	7910314	0.99604	1911199	0.241608	341
VOVP119	Omnivorous	6501934	108814	0.0167356	6477604	0.996258	1531719	0.236464	342
VOVP11	Omnivorous	5209185	82460	0.0158297	5193581	0.997005	1425636	0.2745	345
VOVP121	Vegan	6552944	119794	0.0182809	6533362	0.997012	2223286	0.340297	346
VOVP122	Vegan	6859371	127076	0.0185259	6813837	0.993362	1993215	0.292525	350
VOVP124	Vegetarian	5343280	90861	0.0170047	5311333	0.994021	1128150	0.212404	353
VOVP125	Vegan	6965751	131951	0.0189428	6927789	0.99455	1308535	0.188882	341
VOVP126	Vegan	6798587	103675	0.0152495	6745745	0.992228	1596894	0.236726	351
VOVP127	Vegan	5838701	94640	0.0162091	5805255	0.994272	1098794	0.189276	346
VOVP129	Vegetarian	5472460	86684	0.01584	5446335	0.995226	1406613	0.258268	349
VOVP130	Vegan	4073286	67840	0.0166549	4047315	0.993624	838301	0.207125	349
VOVP131	Vegan	5079489	82308	0.016204	5059070	0.99598	888473	0.17562	355
VOVP132	Vegan	7384217	145747	0.0197376	7370130	0.998092	1535044	0.208279	353
VOVP133	Vegan	5425961	73558	0.0135567	5396934	0.99465	879171	0.162902	348
VOVP134	Vegan	5574789	97518	0.0174927	5550274	0.995603	1072329	0.193203	354
VOVP135	Vegetarian	6515648	95596	0.0146718	6494159	0.996702	1354474	0.208568	346
VOVP136	Vegan	4402919	70686	0.0160543	4378587	0.994474	745276	0.170209	361
VOVP137	Vegetarian	7003211	102152	0.0145865	6971185	0.995427	1064089	0.152641	349
VOVP139	Omnivorous	5552225	88367	0.0159156	5525859	0.995251	1024381	0.18538	341
VOVP13	Omnivorous	6433143	101018	0.0157027	6409536	0.99633	1504479	0.234725	347
VOVP140	Vegetarian	5349882	67226	0.0125659	5335624	0.997335	832266	0.155983	356
VOVP141	Omnivorous	6152532	88518	0.0143872	6026449	0.979507	963046	0.159803	370
VOVP142	Vegetarian	8019935	149391	0.0186275	8002589	0.997837	2529754	0.316117	346
VOVP144	Vegan	6371896	110224	0.0172985	6348630	0.996349	1303842	0.205374	346
VOVP15	Omnivorous	6615022	126382	0.0191053	6591444	0.996436	2311739	0.350718	353
VOVP16	Omnivorous	7771048	149551	0.0192446	7736058	0.995497	2272744	0.293786	340
VOVP19	Vegan	6524909	107719	0.0165089	6515763	0.998598	1903295	0.292106	350
VOVP21	Vegan	6854235	121624	0.0177444	6812249	0.993874	1694344	0.24872	343
VOVP23	Omnivorous	6995083	125987	0.0180108	6980644	0.997936	1958235	0.280524	343
VOVP25	Vegetarian	6514684	109605	0.0168243	6501054	0.997908	2023536	0.311263	355
VOVP28	Omnivorous	8861273	158757	0.0179158	8813926	0.994657	2566943	0.291237	346
VOVP29	Vegan	3056759	60770	0.0198805	3025330	0.989718	943326	0.311809	343
VOVP35	Vegetarian	6537723	105628	0.0161567	6525494	0.998129	1984400	0.3041	353
VOVP36	Omnivorous	7284943	130264	0.0178813	7244307	0.994422	1828448	0.252398	348
VOVP38	Vegetarian	8103512	153266	0.0189135	8063725	0.99509	1565818	0.19418	346
VOVP39	Omnivorous	5994609	93146	0.0155383	5958967	0.994054	1724131	0.289334	363
VOVP40	Omnivorous	6609173	119941	0.0181477	6576931	0.995122	1602734	0.24369	346
VOVP45	Omnivorous	6582591	108447	0.0164748	6571415	0.998302	1423625	0.216639	344
VOVP46	Vegetarian	6796730	132720	0.019527	6769745	0.99603	2142688	0.316509	342
VOVP4	Omnivorous	7231721	129224	0.0178691	6971131	0.963966	2474766	0.355002	350
VOVP51	Omnivorous	6678121	122880	0.0184004	6663296	0.99778	1351790	0.202871	349
VOVP52	Vegan	6812948	115606	0.0169686	6795367	0.997419	1374612	0.202287	342
VOVP53	Vegetarian	4335803	75320	0.0173716	4330098	0.998684	1045938	0.241551	350
VOVP54	Vegan	6533535	125176	0.019159	6515164	0.997188	1610942	0.24726	345
VOVP62	Vegetarian	7216480	124634	0.0172707	7158955	0.992029	2856613	0.399027	353
VOVP63	Vegetarian	8407928	161539	0.0192127	8347113	0.992767	3392661	0.406447	352
VOVP67	Vegetarian	5670311	97510	0.0171966	5657631	0.997764	1219826	0.215607	343
VOVP70	Omnivorous	5847363	112313	0.0192075	5830686	0.997148	1659145	0.284554	351
VOVP72	Vegetarian	10431606	198898	0.0190669	10390601	0.996069	3615506	0.347959	343
VOVP73	Vegetarian	6490962	118104	0.0181951	6460322	0.99528	2693664	0.416955	350
VOVP74	Omnivorous	7671226	139054	0.0181267	7641307	0.9961	1533693	0.200711	353
VOVP77	Omnivorous	8511784	138787	0.0163053	8402930	0.987211	1872337	0.22282	349
VOVP79	Vegetarian	6681132	114692	0.0171666	6641663	0.994092	2069154	0.311542	348
VOVP80	Vegetarian	6621785	121609	0.018365	6599392	0.996618	1936334	0.293411	346
VOVP81	Vegan	7014174	121168	0.0172747	6811502	0.971105	1434675	0.210625	353
VOVP82	Vegan	5843505	105606	0.0180724	5837175	0.998917	1136589	0.194716	336
VOVP84	Vegetarian	7463003	137290	0.0183961	7449950	0.998251	1831796	0.24588	353
VOVP85	Omnivorous	6222762	96625	0.0155277	6175838	0.992459	1178401	0.190808	366
VOVP87	Vegetarian	5951231	119407	0.0200643	5915851	0.994055	1357331	0.22944	349
VOVP90	Vegan	3564721	59788	0.0167721	3549491	0.995728	453403	0.127737	373
VOVP91	Vegan	6245186	100498	0.0160921	6226818	0.997059	1676915	0.269305	343
VOVP92	Vegetarian	7238461	116897	0.0161494	7212511	0.996415	1767720	0.245091	350
VOVP97	Vegetarian	6867701	137265	0.019987	6835860	0.995364	1915627	0.280232	348

## Sheet: B_DE_analysis_result
	Median reads			log2FC			p-value			adjusted p-value
ID	Omnivorous	Vegetarian	Vegan	Vegetarian/Omnivorous	Vegan/Omnivorous	Vegan/Vegetarian	Vegan/Omnivorous	Vegetarian/Omnivorous	Vegan/Vegetarian	Vegan/Omnivorous	Vegetarian/Omnivorous	Vegan/Vegetarian
hsa-let-7a-2-3p	0	0	0	0.397656	0.173172	0.228254	0.910135	0.919474	1	1	1	1
hsa-let-7a-3p	56560	57209.9	53308.8	-0.0594295	-0.0184444	-0.0403627	0.3725	0.767188	0.549394	1	1	1
hsa-let-7a-5p	191.96	176.758	173.89	-0.10802	-0.0487692	-0.0595687	0.203664	0.569862	0.509433	1	1	1
hsa-let-7b-3p	45.902	38.5866	45.9678	0.0494355	-0.0969097	0.158685	0.577175	0.203523	0.0942417	1	1	1
hsa-let-7b-5p	10789.6	10969.7	11549.9	0.0050116	-0.0321509	0.0346191	0.933257	0.564481	0.559819	1	1	1
hsa-let-7c-3p	0	0	0	0.310912	0.244867	0.116385	1	0.810886	1	1	1	1
hsa-let-7c-5p	1875.47	1868.34	1761.85	-0.0673541	0.0100172	-0.0782597	0.38582	0.899569	0.316509	1	1	1
hsa-let-7d-3p	1189.81	1177.19	1276.73	0.0878342	0.0187984	0.0656035	0.256478	0.795426	0.39556	1	1	1
hsa-let-7d-5p	15798	15468	15488.7	-0.0578262	-0.0377865	-0.0199087	0.327147	0.518504	0.772793	1	1	1
hsa-let-7e-3p	5.72903	5.64681	5.3519	0.071398	0.028274	0.0408235	0.735778	0.882004	0.848845	1	1	1
hsa-let-7e-5p	1799.63	1878.16	1576.78	-0.156188	0.0396052	-0.192921	0.249816	0.758587	0.128652	1	1	1
hsa-let-7f-1-3p	77.3828	75.2327	77.6658	-0.105322	-0.0854575	-0.00387381	0.398757	0.516463	0.976198	1	1	1
hsa-let-7f-2-3p	16.2276	14.8959	13.2782	-0.203078	-0.222715	0.021757	0.26156	0.19928	0.905691	1	1	1
hsa-let-7f-5p	98.9055	90.0117	97.7914	-0.124555	-0.109627	-0.000424835	0.258233	0.353239	0.997045	1	1	1
hsa-let-7g-3p	0.80267	0.978573	0.991609	0.215703	-0.00659923	0.212617	0.587351	0.980696	0.536742	1	1	1
hsa-let-7g-5p	113849	113368	104391	-0.140033	-0.0500496	-0.0890929	0.0504242	0.451401	0.225341	1	1	1
hsa-let-7i-3p	5.31347	3.96168	4.22209	-0.206593	-0.48038	0.255941	0.316752	0.00677892	0.200926	1	1	1
hsa-let-7i-5p	154126	155740	141616	-0.0343326	-0.00159226	-0.0320304	0.688258	0.983683	0.703001	1	1	1
hsa-miR-1-2-5p	677.818	1025.28	698.324	0.523942	0.496469	0.0269456	0.0547589	0.040919	0.923896	1	1	1
hsa-miR-1-3p	0	0	0	0.396052	-0.320273	0.751659	0.556557	0.634127	0.220007	1	1	1
hsa-miR-1-5p	631.7	907.159	643.781	0.495072	0.484288	0.0117794	0.0701646	0.0483726	0.967112	1	1	1
hsa-miR-100-3p	0	0	0	-0.0593323	0.425584	-0.548409	0.896411	0.778179	0.79731	1	1	1
hsa-miR-100-5p	103.038	187.487	111.966	0.0816929	0.337729	-0.289862	0.770482	0.183146	0.298394	1	1	1
hsa-miR-101-2-5p	0	0	0	0.357183	-0.126356	0.506717	0.798762	0.851726	0.657223	1	1	1
hsa-miR-101-3p	0.937021	1.05581	0.532681	-0.440357	0.048139	-0.480569	0.278106	0.89134	0.197223	1	1	1
hsa-miR-101-5p	1860.38	1904.38	1565.93	-0.23814	-0.0622971	-0.169006	0.0481353	0.592238	0.141611	1	1	1
hsa-miR-10226	0	0	0	0.343728	0.366658	-0.0147167	0.903281	0.669699	0.949174	1	1	1
hsa-miR-10226-3p	0	0	0	0.0667351	0.191087	-0.1673	1	0.781462	0.704656	1	1	1
hsa-miR-10392-3p	0	0	0	0.530503	0.299282	0.227306	0.776548	0.727141	1	1	1	1
hsa-miR-10392-5p	1.26043	0.835528	1.2168	0.0898515	-0.229726	0.32659	0.783776	0.474164	0.348958	1	1	1
hsa-miR-10393-3p	0	0	0	0.175554	0.153647	0.0165963	1	0.898041	1	1	1	1
hsa-miR-10393-5p	0	0	0	0.175554	-0.0510953	0.232854	1	0.961898	0.98073	1	1	1
hsa-miR-10394-3p	0	0	0	0.513761	0.086423	0.438226	0.814753	0.95059	0.842445	1	1	1
hsa-miR-10394-5p	0	0	0	0.326798	0.0961513	0.233014	0.932705	0.94508	0.956797	1	1	1
hsa-miR-10395-3p	0.6234	0.527272	0.854412	0.45736	-0.206953	0.738389	0.358633	0.626956	0.10624	1	1	1
hsa-miR-10395-5p	0	0	0	0.165861	-0.408815	0.602301	1	0.689958	0.660957	1	1	1
hsa-miR-10396a-3p	0	0	0	0.0524784	-0.192582	0.232047	1	0.865535	1	1	1	1
hsa-miR-10396a-5p	0	0	0	-0.205335	-0.670739	0.477516	0.663172	0.332701	0.807173	1	1	1
hsa-miR-10396b-3p	0	0	0	0.205823	-0.0327937	0.237861	1	0.9708	1	1	1	1
hsa-miR-10396b-5p	0	0	0	0.0126874	-0.432664	0.469882	1	0.625391	0.853385	1	1	1
hsa-miR-10397-3p	0	0	0	0.107683	0.226168	-0.132628	1	0.73328	0.784276	1	1	1
hsa-miR-10397-5p	0	0	0	0.168397	-0.311484	0.461819	1	0.700567	0.726791	1	1	1
hsa-miR-10398-3p	0	0	0	0.268612	-0.408882	0.715485	0.802574	0.452934	0.347474	1	1	1
hsa-miR-10398-5p	0	0	0	0.520162	0.0171173	0.521367	0.624381	0.965746	0.689991	1	1	1
hsa-miR-10399-3p	135.808	132.724	125.673	0.0064835	0.025442	-0.024343	0.962481	0.849973	0.827956	1	1	1
hsa-miR-10399-5p	22.4301	22.288	17.4774	-0.203223	-0.0209878	-0.18384	0.15984	0.885262	0.230409	1	1	1
hsa-miR-103a-1-5p	0	0	0	0.186523	-0.932144	1.15494	1	0.203653	0.0794617	1	1	1
hsa-miR-103a-2-5p	4.468	3.39017	4.30344	-0.171096	-0.462027	0.313425	0.510047	0.0826601	0.243514	1	1	1
hsa-miR-103a-3p	2.30147	1.9242	2.19747	-0.205864	-0.525517	0.373967	0.467021	0.0832465	0.195202	1	1	1
hsa-miR-103b-3p	8438.97	9020.39	8754.41	-0.0351199	0.029038	-0.0645732	0.745282	0.800781	0.558042	1	1	1
hsa-miR-103b-5p	2.51231	1.45307	2.29469	-0.0922698	-0.553976	0.471971	0.759371	0.0706341	0.120981	1	1	1
hsa-miR-10400-3p	0	0	0	0.312119	0.385943	-0.0673736	0.938786	0.650456	0.866526	1	1	1
hsa-miR-10400-5p	1.23827	1.0073	1.3095	-0.106721	-0.31196	0.206549	0.746748	0.36834	0.579889	1	1	1
hsa-miR-10401-3p	7.5332	6.88321	6.75929	0.0309759	0.134065	-0.109667	0.856553	0.452579	0.531753	1	1	1
hsa-miR-10401-5p	0	0	0	0.524496	0.258216	0.240226	0.550658	0.65923	0.800217	1	1	1
hsa-miR-105-3p	0	0	0	1.14954	0.112761	1.06306	0.0567779	0.919701	0.0450659	1	1	1
hsa-miR-105-5p	0	0	0	-0.130881	-0.138186	-0.00487628	0.84376	0.92285	0.97354	1	1	1
hsa-miR-10522-3p	0	0	0	-0.0207111	-0.138705	0.0992164	0.95248	0.921615	1	1	1	1
hsa-miR-10522-5p	0	0	0	0.0463012	-0.00643974	0.0534109	1	1	1	1	1	1
hsa-miR-10523-3p	0	0	0	0.757692	-0.29328	1.09983	0.274491	0.766858	0.16543	1	1	1
hsa-miR-10523-5p	0	0	0	0.603556	-0.193289	0.835705	0.681618	0.877891	0.640274	1	1	1
hsa-miR-10524-3p	0	0	0	0.318028	0.305806	0.0185879	0.940133	0.779836	1	1	1	1
hsa-miR-10524-5p	0	0	0	0.313601	0.157896	0.160046	0.946675	0.934942	1	1	1	1
hsa-miR-10525-3p	0	0	0	0.546054	0.230875	0.306119	0.821104	0.860011	1	1	1	1
hsa-miR-10525-5p	0	0	0	0.559508	0.162127	0.396936	0.692663	0.923816	0.713382	1	1	1
hsa-miR-10526-3p	0	0	0	0.389059	-0.00958645	0.383527	0.840302	1	0.834452	1	1	1
hsa-miR-10526-5p	0	0	0	0.386309	0.136638	0.229762	0.883045	0.912103	1	1	1	1
hsa-miR-10527-3p	41.7566	42.5304	44.821	0.034077	-0.0310275	0.0655601	0.644909	0.676783	0.399854	1	1	1
hsa-miR-10527-5p	41.7566	42.5304	44.821	0.0300453	-0.0296731	0.0605316	0.683076	0.689956	0.434946	1	1	1
hsa-miR-106a-3p	1.25717	1.00213	1.11252	-0.300384	-0.370922	0.151304	0.418313	0.315651	0.67942	1	1	1
hsa-miR-106a-5p	51.5288	56.8102	57.6605	-0.182683	-0.0894581	-0.0734211	0.196937	0.536617	0.572086	1	1	1
hsa-miR-106b-3p	2800.33	2697.59	2804.02	0.0111221	0.00722485	0.00660693	0.853494	0.89158	0.904579	1	1	1
hsa-miR-106b-5p	145.795	153.3	135.98	-0.205538	-0.211268	0.0114476	0.157947	0.124223	0.932283	1	1	1
hsa-miR-107	0	0	0	-0.071007	-0.129487	0.0877713	0.9073	0.834564	1	1	1	1
hsa-miR-107-5p	250.433	231.539	243.848	-0.065028	-0.0951234	0.0277052	0.673456	0.571532	0.85831	1	1	1
hsa-miR-10a-3p	14.8853	14.9064	14.609	-0.0398289	0.0560601	-0.0975997	0.78237	0.694295	0.553812	1	1	1
hsa-miR-10a-5p	2768.32	3093.78	2822.53	0.0602021	0.12538	-0.076404	0.497364	0.165385	0.396101	1	1	1
hsa-miR-10b-3p	0	0	0.189117	0.916746	0.285763	0.553537	0.030321	0.557306	0.211592	1	1	1
hsa-miR-10b-5p	258.528	264.446	290.903	0.369838	0.0990565	0.258995	0.0124864	0.412431	0.0786289	1	1	1
hsa-miR-11181-3p	0	0	0	0.438201	0.234294	0.226256	0.903443	0.899411	1	1	1	1
hsa-miR-11181-5p	0	0	0	0.246434	-0.0542952	NA	1	0.963623	NA	1	1	NA
hsa-miR-11399	0	0.598035	0	0.101282	0.371958	-0.24734	0.971122	0.392409	0.554956	1	1	1
hsa-miR-11399-3p	0	0	0	0.806732	0.748879	0.00993667	0.235623	0.336851	1	1	1	1
hsa-miR-11400	0.736928	0.52513	0	-0.272406	-0.453257	0.241975	0.533372	0.256485	0.662837	1	1	1
hsa-miR-11400-3p	1363.34	1443.93	1275.49	-0.0862475	0.0821483	-0.167643	0.446811	0.488826	0.122977	1	1	1
hsa-miR-11401	0	0	0	0.198087	-0.124553	0.305175	1	0.923531	0.928806	1	1	1
hsa-miR-11401-3p	23.6775	30.13	21.1378	0.0504461	0.484068	-0.427442	0.86048	0.113939	0.179117	1	1	1
hsa-miR-1178-3p	0	0	0	0.610865	0.307597	0.309345	0.580937	0.747769	0.725249	1	1	1
hsa-miR-1178-5p	0	0	0	0.38545	0.161317	0.241022	0.899787	0.932268	0.96486	1	1	1
hsa-miR-1179	0	0	0	0.276634	0.0907912	0.16805	0.930243	0.887906	1	1	1	1
hsa-miR-1179-3p	0.814619	0.229028	0.901911	-0.0950769	-0.486183	0.403391	0.776728	0.198393	0.313994	1	1	1
hsa-miR-1180-3p	11.6559	11.6063	12.4324	0.00427865	0.0237905	-0.0451656	0.982335	0.897191	0.802161	1	1	1
hsa-miR-1180-5p	0	0	0	0.387776	0.158286	0.23222	0.928959	0.922054	1	1	1	1
hsa-miR-1181	1.55593	1.87478	2.85327	0.61238	0.203707	0.43752	0.0381454	0.512129	0.136289	1	1	1
hsa-miR-1181-3p	17.8546	19.351	19.47	0.0667577	0.290985	-0.2249	0.666889	0.0644558	0.115508	1	1	1
hsa-miR-1182	0	0	0	0.658891	0.0159306	0.630982	0.406736	1	0.436104	1	1	1
hsa-miR-1182-5p	0	0	0	-0.224555	-0.132675	-0.0708458	0.798319	1	0.855888	1	1	1
hsa-miR-1183	0	0	0	0.142301	-0.114144	0.193352	1	0.843051	0.900027	1	1	1
hsa-miR-1183-5p	0	0	0	0.0759151	-0.134505	0.210576	0.868788	0.871295	0.761532	1	1	1
hsa-miR-1184	1.235	1.51206	1.12841	0.0780876	0.200613	-0.174359	0.820419	0.47735	0.582992	1	1	1
hsa-miR-1184-5p	0	0	0	0.0730398	0.087737	-0.0157073	1	0.85829	0.888992	1	1	1
hsa-miR-1185-3p	67.9813	73.5959	75.7688	0.236491	0.214141	0.0244778	0.241808	0.284276	0.905248	1	1	1
hsa-miR-1185-5p	67.9813	73.5959	75.7688	0.236353	0.213828	0.0246709	0.24212	0.284972	0.904497	1	1	1
hsa-miR-1193	0	0	0	0.776881	0.271562	0.447945	0.129947	0.75243	0.430109	1	1	1
hsa-miR-1193-3p	0	0.598035	0	0.0750065	0.676538	-0.52415	1	0.110151	0.169052	1	1	1
hsa-miR-1197	0	0	0	-0.0851095	-0.195458	0.117595	0.755418	0.638532	1	1	1	1
hsa-miR-1197-5p	8.23192	11.2619	9.26512	0.132342	0.138208	-0.00638981	0.63254	0.582909	0.979946	1	1	1
hsa-miR-1199-3p	0	0	0	0.621837	0.086807	0.524831	0.618828	0.943628	0.764896	1	1	1
hsa-miR-1199-5p	0	0	0	0.281722	0.227949	0.0898498	0.84011	0.684725	1	1	1	1
hsa-miR-1200	0	0	0	0.996696	0.240368	0.745567	0.30718	0.886273	0.341348	1	1	1
hsa-miR-1200-3p	0	0	0	0.187782	0.416705	-0.243473	1	0.574637	0.719587	1	1	1
hsa-miR-1202	0	0	0	0.346174	-0.116665	0.446637	0.947941	0.888324	0.797216	1	1	1
hsa-miR-1202-3p	0	0	0	0.146305	0.0740391	0.029758	0.90128	0.889213	1	1	1	1
hsa-miR-1203	0	0	0	-0.00267666	-0.0321212	0.020325	0.969442	0.973534	1	1	1	1
hsa-miR-1203-3p	0	0	0	-0.286336	-0.100226	-0.118971	0.480759	0.762616	0.889804	1	1	1
hsa-miR-1204	0	0	0	0.314757	-0.0537366	0.376376	1	0.952996	0.923301	1	1	1
hsa-miR-1204-3p	0	0	0	0.34398	0.21147	0.157716	1	0.876907	1	1	1	1
hsa-miR-1205	0	0	0	1.00384	0.327586	0.719714	0.202461	0.584053	0.424833	1	1	1
hsa-miR-1205-3p	0	0	0	0.459514	0.233602	0.222313	0.841943	0.776571	1	1	1	1
hsa-miR-1206	0	0	0	0.387221	0.017815	0.382633	0.908726	0.980424	0.927711	1	1	1
hsa-miR-1206-3p	0	0	0	0.447897	0.0202875	0.471841	0.892043	1	0.849047	1	1	1
hsa-miR-1207-3p	0	0	0	0.0604995	-0.0331767	0.111359	1	1	1	1	1	1
hsa-miR-1207-5p	0	0	0	0.510237	-0.0651142	0.570547	0.360196	0.907881	0.2855	1	1	1
hsa-miR-1208	0	0	0	0.691381	0.162186	0.529393	0.698534	0.894704	0.77322	1	1	1
hsa-miR-1208-3p	0	0	0	-0.106494	0.275831	-0.347388	0.698767	0.600861	0.377371	1	1	1
hsa-miR-12113	0	0	0	-0.0484953	0.351218	-0.361418	0.876384	0.581035	0.513819	1	1	1
hsa-miR-12113-3p	0	0	0	0.552424	0.0200329	0.542711	0.683641	0.991185	0.665499	1	1	1
hsa-miR-12114	0	0	0	1.12331	0.301157	0.848237	0.550616	0.786746	0.627265	1	1	1
hsa-miR-12114-3p	4.79275	4.48951	5.30767	-0.00457743	-0.137564	0.151109	0.978409	0.401712	0.39006	1	1	1
hsa-miR-12115	0	0	0	0.33748	0.170621	0.179041	0.857517	0.863227	0.931091	1	1	1
hsa-miR-12115-3p	0	0	0	0.254417	0.0689946	0.182113	0.800762	0.891206	1	1	1	1
hsa-miR-12116	0	0	0	0.318907	0.25787	0.00646391	1	0.647397	1	1	1	1
hsa-miR-12116-3p	0	0	0	0.646466	0.820979	-0.186071	0.388522	0.152753	0.641674	1	1	1
hsa-miR-12117	0	0	0	0.411669	0.146382	0.253495	0.749352	0.890737	0.825165	1	1	1
hsa-miR-12117-3p	0	0	0	0.159116	0.0654919	0.0458296	0.968518	1	1	1	1	1
hsa-miR-12118	0.974042	0	0.688745	0.363861	-0.283775	0.766302	0.543805	0.640611	0.230698	1	1	1
hsa-miR-12118-3p	0	0	0	-0.137597	0.359914	-0.381918	0.728096	0.475119	0.376571	1	1	1
hsa-miR-12119	0	0	0	0.803887	0.16276	0.64336	0.459487	0.909127	0.509448	1	1	1
hsa-miR-12119-3p	1.0824	1.04185	1.49777	0.408092	0.13353	0.323485	0.254154	0.680604	0.343168	1	1	1
hsa-miR-12120	0	0	0	0.257824	0.087299	0.157569	0.925147	0.978036	0.935288	1	1	1
hsa-miR-12120-3p	0	0	0	0.160968	-0.10544	0.26204	1	0.767277	0.827441	1	1	1
hsa-miR-12121	1.8954	2.71964	2.65707	0.177876	0.231811	-0.105039	0.49728	0.31402	0.633994	1	1	1
hsa-miR-12121-3p	0	0	0	-0.011546	0.466422	-0.473924	0.937641	0.342236	0.274125	1	1	1
hsa-miR-12122	0	0	0	0.890556	0.23043	0.586957	0.857728	0.852277	1	1	1	1
hsa-miR-12122-3p	0	0	0	0.253648	0.365264	-0.0167404	1	0.906811	0.961915	1	1	1
hsa-miR-12123	0	0	0	NA	0.165608	0.167518	NA	0.906576	1	NA	1	1
hsa-miR-12123-3p	0	0	0	0.253678	0.0931875	0.163342	1	1	1	1	1	1
hsa-miR-12124	0	0	0	0.804385	0.580637	0.199174	0.244585	0.215931	0.882417	1	1	1
hsa-miR-12124-5p	0	0	0	0.414036	0.100194	0.314293	0.680058	0.855656	0.733817	1	1	1
hsa-miR-12125	0	0	0	0.251505	-0.120008	0.381183	0.864257	0.92527	0.87076	1	1	1
hsa-miR-12125-5p	0	0	0	0.463111	0.125524	0.364295	0.450662	0.817425	0.550576	1	1	1
hsa-miR-12126	0.175695	0	0	-0.342985	-0.230293	-0.110987	0.368041	0.594084	0.716968	1	1	1
hsa-miR-12126-5p	0	0	0	0.35315	0.0821063	0.282932	0.598695	0.877273	0.7011	1	1	1
hsa-miR-12127	0.537886	0.547783	1.04978	0.711506	0.0588804	0.682724	0.0778539	0.920475	0.0807583	1	1	1
hsa-miR-12127-5p	0	0	0	0.963681	0.163922	0.759875	0.115205	0.738611	0.166368	1	1	1
hsa-miR-12128	0	0	0	0.0409019	-0.618593	0.755939	1	0.231021	0.232906	1	1	1
hsa-miR-12128-5p	0	0	0	0.643861	0.661217	-0.0208986	0.422601	0.353121	0.94179	1	1	1
hsa-miR-12129	0	0	0	0.199568	0.0524236	0.163516	1	0.893531	1	1	1	1
hsa-miR-12129-5p	0	0	0	0.252686	-0.0672245	0.309058	1	0.830974	0.786004	1	1	1
hsa-miR-12130	0	0	0	0.628843	0.155474	0.470988	0.456413	0.814983	0.562198	1	1	1
hsa-miR-12130-5p	0	0	0	0.400606	0.226272	0.154399	1	0.89565	1	1	1	1
hsa-miR-12131	0	0	0	1.21755	0.280442	0.949592	0.303956	0.809879	0.298565	1	1	1
hsa-miR-12131-5p	0	0	0	0.241838	0.0207665	0.238255	1	0.981314	1	1	1	1
hsa-miR-12132	0	0	0	0.328149	0.178155	0.178623	0.952209	0.908609	1	1	1	1
hsa-miR-12132-5p	0	0	0	0.197255	-0.111512	0.31431	1	0.961979	1	1	1	1
hsa-miR-12133	0	0	0	0.500524	0.0104932	0.491793	0.842776	0.991751	0.854273	1	1	1
hsa-miR-12133-5p	0	0	0	NA	0.0862554	0.235534	NA	0.953856	1	NA	1	1
hsa-miR-12135	0	0	0	0.246434	-0.0542952	NA	1	0.962551	NA	1	1	NA
hsa-miR-12135-5p	3.05855	2.60694	3.41354	-0.0825441	-0.349909	0.305634	0.780637	0.250889	0.275949	1	1	1
hsa-miR-12136	9.39986	7.72718	8.36826	-0.221301	-0.192616	-0.0473557	0.236212	0.33775	0.813416	1	1	1
hsa-miR-12136-3p	154.694	123.973	117.438	-0.161598	-0.0444405	-0.120846	0.242995	0.781026	0.428069	1	1	1
hsa-miR-122-3p	0	0	0	0.366456	-0.225273	0.588796	0.709375	0.795942	0.54189	1	1	1
hsa-miR-122-5p	1116.37	994.415	1033.14	-0.163371	-0.287858	0.129015	0.592319	0.284353	0.657258	1	1	1
hsa-miR-1224-3p	0	0	0	0.161439	-0.203038	0.379793	1	0.889486	0.916975	1	1	1
hsa-miR-1224-5p	0	0	0	0.16856	0.272661	-0.114299	0.740139	0.549279	0.787828	1	1	1
hsa-miR-1225-3p	0	0	0	0.530426	0.230224	0.288897	0.376916	0.699194	0.663836	1	1	1
hsa-miR-1225-5p	0	0	0	0.457857	0.387463	0.0742647	0.688126	0.429404	1	1	1	1
hsa-miR-1226-3p	2.48698	2.72477	2.38712	0.285184	0.181325	0.0545439	0.313505	0.426699	0.830711	1	1	1
hsa-miR-1226-5p	0	0	0	-0.254752	-0.180897	-0.038738	0.635561	0.828789	0.872883	1	1	1
hsa-miR-1227-3p	0	0	0	-0.10224	-0.580583	0.444211	0.794982	0.251468	0.450322	1	1	1
hsa-miR-1227-5p	0	0	0	0.322993	0.349159	-0.0644696	1	0.65304	0.843415	1	1	1
hsa-miR-1228-3p	0	0	0	0.312196	0.0908077	0.234388	0.966898	0.967244	1	1	1	1
hsa-miR-1228-5p	0	0	0	0.741861	-0.181497	0.845921	0.393174	0.647764	0.245125	1	1	1
hsa-miR-1229-3p	4.32514	4.30854	4.39998	0.00774972	-0.0864025	0.0769133	0.967992	0.629011	0.687048	1	1	1
hsa-miR-1229-5p	0	0.423978	0	0.243467	-0.0316326	0.19986	0.680708	0.960271	0.728749	1	1	1
hsa-miR-122b-3p	0	0	0	0.477454	0.093746	0.384941	0.844588	0.935618	0.934279	1	1	1
hsa-miR-122b-5p	0	0	0	0.0859516	0.0694083	0.0231464	1	1	1	1	1	1
hsa-miR-1231	0	0	0	0.144429	-0.0448003	0.242657	0.985968	1	0.939077	1	1	1
hsa-miR-1231-3p	0	0	0	0.26226	0.439343	-0.180101	1	0.388247	0.605705	1	1	1
hsa-miR-1233-3p	0	0.225209	0	0.286576	0.298949	-0.0782041	0.58294	0.494878	0.79013	1	1	1
hsa-miR-1233-5p	0.760655	0.872332	0.614525	-0.00272346	-0.27081	0.269921	0.995925	0.59616	0.596109	1	1	1
hsa-miR-1234-3p	0.920594	0.701597	0	-0.217199	-0.602606	0.440184	0.577485	0.125532	0.278062	1	1	1
hsa-miR-1234-5p	0.974042	0.738918	0	-0.289351	-0.639646	0.408565	0.457981	0.0961723	0.292781	1	1	1
hsa-miR-1236-5p	0	0	0	0.30395	0.00532132	0.30267	1	1	0.84847	1	1	1
hsa-miR-1237-5p	0	0	0	0.307236	-0.166769	0.450967	0.685841	0.686651	0.408444	1	1	1
hsa-miR-1238-3p	0	0	0	0.725172	0.821861	-0.108666	0.358712	0.0924093	0.719446	1	1	1
hsa-miR-1238-5p	0	0	0	0.0857855	0.093665	0.0233282	1	0.973909	1	1	1	1
hsa-miR-124-3p	0	0	0	0.212692	0.170902	-0.0110339	1	0.951491	0.955613	1	1	1
hsa-miR-124-5p	1.36943	1.0822	0.920191	-0.110472	-0.16446	0.0709271	0.789799	0.669469	0.884943	1	1	1
hsa-miR-1243-3p	0	0	0	0.546343	-0.0502563	0.606846	0.755275	0.970335	0.723841	1	1	1
hsa-miR-1244	0	0	0	-0.147257	-0.364121	0.308012	0.818677	0.728652	0.853296	1	1	1
hsa-miR-1244-5p	0	0	0	0.819951	0.3225	0.462928	0.195663	0.550518	0.460588	1	1	1
hsa-miR-1245a	0	0	0	0.0203201	-0.132318	0.15651	1	0.911646	1	1	1	1
hsa-miR-1245a-5p	0	0	0	0.5328	NA	0.523144	0.793539	NA	0.788189	1	NA	1
hsa-miR-1245b-5p	0	0	0	0.387428	0.158845	0.235482	0.859857	0.932355	0.929404	1	1	1
hsa-miR-1246	0	0	0	0.316975	0.0138345	0.30781	0.967511	1	0.924886	1	1	1
hsa-miR-1246-3p	21.3638	21.1413	22.8074	-0.015398	-0.171517	0.175436	0.925271	0.309168	0.29434	1	1	1
hsa-miR-1247-3p	0	0	0	-0.772945	-0.462136	-0.292246	0.191182	0.430236	0.590194	1	1	1
hsa-miR-1247-5p	0	0	0	-6.03354e-05	-0.0648356	0.125285	0.998718	0.932666	0.948949	1	1	1
hsa-miR-1248	0	0	0	0.118369	-0.270015	0.392344	1	0.860342	0.884682	1	1	1
hsa-miR-1248-3p	1.04004	1.05378	0.639012	0.722122	0.221588	0.563218	0.14661	0.64702	0.262878	1	1	1
hsa-miR-1249-3p	16.6233	17.5234	16.6247	0.106976	-0.011158	0.12472	0.416054	0.926111	0.343564	1	1	1
hsa-miR-1249-5p	0	0	0	0.452255	0.309929	0.163205	1	0.794355	1	1	1	1
hsa-miR-1250-3p	0	0	0	0.315206	-0.0537366	0.376549	0.978609	0.973158	0.924568	1	1	1
hsa-miR-1250-5p	21.7413	22.3345	24.1872	0.0934435	0.0603812	0.0545062	0.43685	0.587417	0.608594	1	1	1
hsa-miR-1251-3p	0	0	0	0.264128	0.538735	-0.391897	1	0.758639	0.699122	1	1	1
hsa-miR-1251-5p	0	0	0	0.456528	0.161707	0.312641	0.822777	0.892416	0.950676	1	1	1
hsa-miR-1252-3p	0	0	0	NA	0.0901558	0.235516	NA	0.962301	1	NA	1	1
hsa-miR-1252-5p	0	0	0	0.237897	-0.129251	0.377448	1	0.927904	0.903404	1	1	1
hsa-miR-1253	0	0	0.528591	0.57088	-0.103722	0.706593	0.390741	0.878461	0.272129	1	1	1
hsa-miR-1253-3p	0	0	0	0.244203	0.186872	0.116629	1	0.792043	0.970413	1	1	1
hsa-miR-1255a	3.53053	4.04833	4.14823	0.266203	-0.0268395	0.241108	0.174793	0.896033	0.211886	1	1	1
hsa-miR-1255a-3p	61.3178	58.6545	72.6372	0.0390147	-0.20027	0.243819	0.856721	0.364332	0.24347	1	1	1
hsa-miR-1255b-1-3p	3.37092	3.70882	4.35503	0.153323	0.0842093	0.0822073	0.407555	0.631424	0.647293	1	1	1
hsa-miR-1255b-2-3p	0	0	0	0.387404	NA	0.376376	0.894963	NA	0.898927	1	NA	1
hsa-miR-1255b-5p	0	0	0	0.703422	-0.187985	0.895961	0.345668	0.69735	0.198781	1	1	1
hsa-miR-1256	0.892958	0.96861	0.98813	-0.00120773	-0.165805	0.29587	0.993218	0.649339	0.404042	1	1	1
hsa-miR-1256-3p	1.68325	1.55593	1.69384	0.0695404	-0.0571929	0.14801	0.792016	0.823891	0.577526	1	1	1
hsa-miR-1257	0	0	0	0.492163	0.450469	0.0583	0.48569	0.401904	0.969709	1	1	1
hsa-miR-1257-3p	0	0	0	-0.0661601	-0.178521	0.116005	0.814413	0.695341	1	1	1	1
hsa-miR-1258	0	0	0	-0.101384	-0.301644	0.211146	0.733536	0.519663	0.866892	1	1	1
hsa-miR-1258-5p	0	0	0	0.189958	-0.584741	0.797296	0.749463	0.609869	0.425133	1	1	1
hsa-miR-125a-3p	12.4064	11.7322	10.4455	-0.153786	-0.0187714	-0.142157	0.292006	0.889837	0.284933	1	1	1
hsa-miR-125a-5p	1230.4	1246.15	1110.21	0.0229255	0.0825241	-0.0637079	0.891374	0.589109	0.681682	1	1	1
hsa-miR-125b-1-3p	0	0.198769	0	0.00209862	0.114714	-0.0884822	1	1	0.788489	1	1	1
hsa-miR-125b-2-3p	3.9841	3.84839	4.31374	-0.00399506	-0.105833	0.106013	0.983437	0.546045	0.537519	1	1	1
hsa-miR-125b-5p	5.11737	5.32893	4.83305	-0.00778148	-0.0671518	0.0663076	0.965646	0.675165	0.681286	1	1	1
hsa-miR-126-3p	123841	122418	117308	-0.055693	0.0431084	-0.0945053	0.448959	0.543232	0.192428	1	1	1
hsa-miR-126-5p	1762.93	1796.17	1629.3	-0.124281	-0.105633	-0.0136838	0.33167	0.371266	0.913299	1	1	1
hsa-miR-1260a	0	0	0	0.252632	-0.289079	0.531512	1	0.580679	0.487527	1	1	1
hsa-miR-1260a-3p	180.04	178.06	181.967	0.050044	0.0313546	0.0194706	0.557928	0.740882	0.811017	1	1	1
hsa-miR-1260b	0	0	0	0.0310582	-0.0651839	0.0787391	1	0.869401	1	1	1	1
hsa-miR-1260b-3p	437.654	448.948	484.566	0.088141	0.024975	0.0619591	0.422896	0.836987	0.553447	1	1	1
hsa-miR-1261	0	0	0	0.456528	0.165607	0.307642	0.873878	0.894347	1	1	1	1
hsa-miR-1261-3p	35.2396	37.9875	36.2308	-0.016195	0.0633738	-0.0806967	0.884158	0.57582	0.512998	1	1	1
hsa-miR-1262	0	0	0	0.321653	0.0918233	0.235827	0.877718	0.959576	0.891574	1	1	1
hsa-miR-1262-3p	5.00123	5.96519	6.73665	0.531127	0.339766	0.204773	0.0106534	0.0741569	0.337422	1	1	1
hsa-miR-1263	0	0	0	0.0907958	-0.128192	0.235361	1	0.952483	1	1	1	1
hsa-miR-1263-3p	0	0	0	0.466847	0.165607	0.313081	0.802943	0.903087	0.91957	1	1	1
hsa-miR-1264	0	0	0	0.479699	0.101552	0.386409	0.737988	0.924874	0.774539	1	1	1
hsa-miR-1264-5p	0	0	0	0.251245	-0.206309	0.451224	1	0.879917	0.87348	1	1	1
hsa-miR-1265	0	0	0	0.116103	0.0436184	0.100584	1	1	1	1	1	1
hsa-miR-1265-3p	0	0	0	0.376693	-0.370677	0.807097	0.553014	0.641303	0.229027	1	1	1
hsa-miR-1266-3p	0	0.608227	0	0.294685	0.173564	0.0984533	0.661295	0.744721	0.851646	1	1	1
hsa-miR-1266-5p	0	0	0	-0.45996	-0.24017	-0.273953	0.329356	0.635987	0.485426	1	1	1
hsa-miR-1267	0	0	0	0.837474	0.0114146	0.833577	0.341649	1	0.373348	1	1	1
hsa-miR-1267-3p	0	0	0	-0.0447755	0.0172228	-0.0261507	0.879296	1	0.913925	1	1	1
hsa-miR-1268a	0	0	0	0.172707	0.0770442	0.150733	1	1	1	1	1	1
hsa-miR-1268a-3p	2.27388	1.91275	1.79344	-0.623241	-0.49989	-0.136209	0.0156482	0.0375879	0.596339	1	1	1
hsa-miR-1268b	0	0	0	0.170317	-0.0501471	0.239175	1	0.946051	1	1	1	1
hsa-miR-1268b-3p	1.87552	1.65895	1.81756	-0.141678	-0.00632287	-0.143269	0.56768	0.978805	0.559434	1	1	1
hsa-miR-1269a	0	0	0	0.0264799	-0.290599	0.268072	1	0.603499	0.81806	1	1	1
hsa-miR-1269a-5p	0	0	0	0.749119	0.755863	-0.00907639	0.353378	0.196991	0.927432	1	1	1
hsa-miR-1269b	0	0	0	0.469366	0.0149515	0.457441	0.903888	0.997974	0.876986	1	1	1
hsa-miR-1269b-3p	0	0	0	-1.16108	-1.27935	-0.709294	0.0294008	0.0349407	0.26094	1	1	1
hsa-miR-127-3p	4871.58	7250.96	7501.72	0.503115	0.488292	0.0146265	0.0256075	0.0299053	0.949839	1	1	1
hsa-miR-127-5p	24.9464	30.1298	32.1367	0.232162	0.286838	-0.0489478	0.201294	0.110469	0.806998	1	1	1
hsa-miR-1270	1.28094	1.59806	1.29601	0.273015	0.331539	-0.0259543	0.49194	0.331299	0.939838	1	1	1
hsa-miR-1270-3p	1.95015	1.54788	2.2287	0.377339	-0.207045	0.562792	0.233227	0.48141	0.065499	1	1	1
hsa-miR-1271-3p	0.754044	0	0	0.0517095	0.33457	-0.284962	0.937792	0.459964	0.602863	1	1	1
hsa-miR-1271-5p	34.4257	33.3158	36.286	0.0166598	-0.0167437	0.0509766	0.873125	0.864347	0.583801	1	1	1
hsa-miR-1272	0.534849	1.15589	0	-0.240714	0.296085	-0.491345	0.629356	0.469354	0.268762	1	1	1
hsa-miR-1272-3p	0	0	0	0.492946	0.242314	0.240364	0.783504	0.798774	1	1	1	1
hsa-miR-1273c	20.698	18.9394	20.0593	0.0809356	-0.126466	0.205485	0.505967	0.259194	0.0377605	1	1	1
hsa-miR-1273c-3p	2.98713	2.82686	2.63009	0.0058056	0.0149233	0.0173154	0.978741	0.940822	0.936855	1	1	1
hsa-miR-1273h-3p	226.903	200.68	214.215	0.0457312	0.0263541	0.0132244	0.657315	0.792018	0.89279	1	1	1
hsa-miR-1273h-5p	53.7885	51.8145	55.9328	0.0306547	-0.0742667	0.107791	0.769118	0.42214	0.289009	1	1	1
hsa-miR-1275	0	0	0	0.105318	0.0277784	0.0971103	1	0.967086	1	1	1	1
hsa-miR-1275-3p	20.8033	18.8423	25.6088	0.093669	-0.163995	0.294203	0.648558	0.514481	0.239554	1	1	1
hsa-miR-1276	0	0	0	-0.509016	-0.801611	0.24641	0.306096	0.124062	0.698079	1	1	1
hsa-miR-1276-3p	0	0	0.756771	0.435346	-0.212663	0.642278	0.293951	0.60542	0.121131	1	1	1
hsa-miR-1277-3p	5.90081	5.65917	5.38914	-0.0674838	-0.0364752	-0.0448883	0.719643	0.843182	0.817894	1	1	1
hsa-miR-1277-5p	40.1325	37.0985	41.2631	-0.0414824	-0.0411654	0.00394088	0.781457	0.779722	0.979726	1	1	1
hsa-miR-1278	0	0	0	0.72087	0.108298	0.647281	0.234937	0.8489	0.281998	1	1	1
hsa-miR-1278-5p	12.3393	13.961	10.7606	-0.276616	0.0326132	-0.297093	0.0588497	0.809376	0.0239837	1	1	1
hsa-miR-1279	0	0	0	NA	0.0941358	0.239175	NA	0.963283	1	NA	1	1
hsa-miR-1279-3p	0	0	0	-0.798064	-0.78608	0.0426972	0.239901	0.233613	1	1	1	1
hsa-miR-128-1-5p	7.12481	6.61685	6.12343	-0.171767	-0.0974285	-0.0628503	0.216869	0.458207	0.656617	1	1	1
hsa-miR-128-2-5p	0	0	0	0.277478	-0.0611231	0.306426	0.86599	1	0.90706	1	1	1
hsa-miR-128-3p	7.12481	6.75345	6.12343	-0.17599	-0.0802867	-0.088624	0.202125	0.541066	0.533288	1	1	1
hsa-miR-1281	0	0	0	-0.172694	-0.338368	0.170694	0.750617	0.695348	1	1	1	1
hsa-miR-1281-5p	0	0	0	-0.242062	-0.421314	0.228131	0.645416	0.567908	1	1	1	1
hsa-miR-1282	0	0	0	0.0996637	0.014445	0.112296	0.975025	0.952847	1	1	1	1
hsa-miR-1282-3p	0	0	0	-0.421939	-0.256896	-0.130667	0.408691	0.645602	0.795501	1	1	1
hsa-miR-1283	0	0	0	-0.000478909	0.062529	-0.0612018	0.990956	0.9638	0.878547	1	1	1
hsa-miR-1283-1-3p	0	0	0	-0.179642	0.154523	-0.33621	0.676219	0.876315	0.486342	1	1	1
hsa-miR-1283-2-3p	0	0	0	0.596014	-0.12989	0.727667	0.671365	0.951327	0.679783	1	1	1
hsa-miR-1284	0.412276	0	0.507175	0.0581627	-0.573727	0.584882	0.918227	0.343301	0.328217	1	1	1
hsa-miR-1284-3p	5.83391	8.45087	7.33989	0.244023	0.305771	-0.0762844	0.16499	0.0696508	0.644768	1	1	1
hsa-miR-1285-2	9.92433	8.88942	9.57158	-0.0721287	-0.0915879	0.0362584	0.594115	0.488044	0.77924	1	1	1
hsa-miR-1285-3p	19.141	20.5014	19.6569	0.0366616	0.16635	-0.137287	0.707897	0.0902233	0.130101	1	1	1
hsa-miR-1285-5p	14.0963	12.336	11.3143	-0.199837	-0.143371	-0.0442573	0.0704383	0.206874	0.701624	1	1	1
hsa-miR-1286	0	0	0	0.123042	-0.0460326	0.182883	1	0.887772	0.938827	1	1	1
hsa-miR-1286-5p	0	0	0	0.399427	-0.0472842	0.447459	0.903546	0.989746	0.916771	1	1	1
hsa-miR-1287-3p	0.624559	0.821891	0	-0.189204	0.120866	-0.281287	0.660329	0.78733	0.48773	1	1	1
hsa-miR-1287-5p	23.1411	23.7001	27.8143	0.224026	0.118845	0.105111	0.0263541	0.255223	0.302404	1	1	1
hsa-miR-1288-3p	4.15168	3.91026	4.25851	0.127282	0.0510808	0.0929189	0.579163	0.805234	0.691644	1	1	1
hsa-miR-1288-5p	0	0	0	0.0750154	0.297438	-0.165396	1	0.551388	0.604133	1	1	1
hsa-miR-1289	1.04769	1.42514	0	-0.636662	-0.138575	-0.50145	0.197006	0.732451	0.267546	1	1	1
hsa-miR-1289-1-5p	0	0	0.189117	0.259852	0.104458	0.133679	0.6811	0.856816	0.81319	1	1	1
hsa-miR-1289-2-5p	0	0	0	-0.0688659	0.239942	-0.366133	0.834128	0.665855	0.512288	1	1	1
hsa-miR-129-3p	0	0	0	0.221551	-0.127387	0.366407	1	0.804175	0.793942	1	1	1
hsa-miR-129-5p	0	0	0	0.276333	0.060421	0.2463	1	1	0.818065	1	1	1
hsa-miR-1290	0	0	0	0.916485	-0.214699	1.1538	0.216753	0.697846	0.102615	1	1	1
hsa-miR-1290-5p	4.04685	3.94179	4.1771	0.103388	-0.168486	0.272341	0.647905	0.45014	0.220147	1	1	1
hsa-miR-1291	0	0	0	0.636981	0.176256	0.492401	0.73254	0.795144	0.799365	1	1	1
hsa-miR-1291-3p	3.82452	3.14734	3.82966	-0.00918827	-0.253669	0.282669	0.971189	0.322854	0.246852	1	1	1
hsa-miR-1292-3p	0	0	0	0.321175	-0.150832	0.467692	0.799119	0.843194	0.667733	1	1	1
hsa-miR-1292-5p	18.7751	18.3124	19.8959	0.0339145	0.0982701	-0.0569517	0.758908	0.398123	0.610358	1	1	1
hsa-miR-1293	0	0	0	0.50445	-0.577789	1.02829	0.318755	0.22166	0.0362965	1	1	1
hsa-miR-1293-3p	1.15719	1.00648	0.262062	-0.429897	-0.0869278	-0.315679	0.22527	0.798292	0.394832	1	1	1
hsa-miR-1294	0	0	0.262062	0.447252	0.342166	0.147575	0.324346	0.50871	0.721837	1	1	1
hsa-miR-1294-3p	15.4496	12.6079	12.592	-0.303358	-0.368078	0.0686845	0.0410034	0.0054769	0.588488	1	1	1
hsa-miR-1295a	0	0	0	0.23893	0.017903	0.23222	1	0.984061	1	1	1	1
hsa-miR-1295a-5p	0	0	0	0.488112	0.425105	0.064514	0.56503	0.405648	1	1	1	1
hsa-miR-1295b-3p	0	0	0	0.170317	0.160343	0.0119902	1	0.936853	1	1	1	1
hsa-miR-1296-3p	0	0	0	0.234932	-0.067838	0.331015	1	0.924574	1	1	1	1
hsa-miR-1296-5p	20.2412	20.5558	21.2556	-0.0821145	-0.00854797	-0.0613223	0.502331	0.950185	0.649134	1	1	1
hsa-miR-1297	0	0	0	0.404566	0.382194	0.0316289	0.847347	0.531969	1	1	1	1
hsa-miR-1297-5p	2.36739	1.67554	1.59266	-0.354748	-0.553638	0.220221	0.321246	0.105727	0.546758	1	1	1
hsa-miR-1298-3p	0	0	0	0.389477	-0.196651	0.606245	0.891747	0.805179	0.64671	1	1	1
hsa-miR-1298-5p	0	0	0	0.164141	0.170011	-0.0266088	1	0.828826	0.906061	1	1	1
hsa-miR-1299	0	0	0	0.474259	0.218651	0.360343	0.433026	0.748549	0.551914	1	1	1
hsa-miR-1299-5p	11.7516	12.9309	18.2994	0.380437	0.33509	0.0896312	0.363221	0.388268	0.818509	1	1	1
hsa-miR-1301-3p	783.448	823.086	840.974	0.0729938	0.0598655	0.00605311	0.500517	0.546466	0.952137	1	1	1
hsa-miR-1301-5p	0	0	0	0.383482	0.38557	-0.0409972	0.677495	0.515103	0.867115	1	1	1
hsa-miR-1302	0	0	0	0.515991	0.0871757	0.63938	0.427163	1	0.378586	1	1	1
hsa-miR-1302	18.1834	16.2005	18.5994	0.0924469	-0.192061	0.294093	0.50347	0.114233	0.0277307	1	1	1
hsa-miR-1302-3-5p	0	0	0	0.152892	-0.199395	0.373216	1	0.894916	0.88944	1	1	1
hsa-miR-1302-4-5p	0	0	0	0.404237	0.336542	0.04736	0.476574	0.443314	1	1	1	1
hsa-miR-1302-5-5p	0	0	0	0.569142	0.8049	-0.238922	0.358999	0.116115	0.589272	1	1	1
hsa-miR-1302-6-5p	0	0	0	0.119352	-0.258337	0.376376	1	0.83793	0.923301	1	1	1
hsa-miR-1302-7-5p	0	0	0	0.32649	0.167412	0.183738	0.932004	0.932097	1	1	1	1
hsa-miR-1302-8-5p	0	0	0	0.635087	0.188975	0.447076	0.48591	0.836511	0.532124	1	1	1
hsa-miR-1303	0	0.507734	0	-0.00739756	0.513151	-0.450402	0.941177	0.200158	0.242813	1	1	1
hsa-miR-1303-5p	4.95306	4.29453	4.30215	-0.187533	-0.264351	0.1327	0.292448	0.154446	0.481321	1	1	1
hsa-miR-1304-3p	69.6186	65.9246	67.7098	-0.0524349	-0.0696162	0.0263534	0.465637	0.374125	0.706289	1	1	1
hsa-miR-1304-5p	38.8478	37.606	36.8548	-0.0826757	-0.108691	0.0336168	0.309062	0.167381	0.681595	1	1	1
hsa-miR-1305	0	0	0	0.39726	0.183269	0.226159	0.931399	0.903491	1	1	1	1
hsa-miR-1305-5p	0	0	0	0.336377	0.161182	0.161494	1	0.897461	1	1	1	1
hsa-miR-1306-3p	21.7521	24.7119	26.4925	0.244896	0.180351	0.0611423	0.0501101	0.138845	0.639834	1	1	1
hsa-miR-1306-5p	9.9139	9.81961	10.1804	0.00920888	-0.0368249	0.0405264	0.947434	0.795468	0.768526	1	1	1
hsa-miR-1307-3p	3961.53	3734.48	4075.37	0.156392	0.0981197	0.0536959	0.212245	0.406422	0.661874	1	1	1
hsa-miR-1307-5p	28.809	27.674	27.2081	-0.136512	-0.247936	0.116857	0.465824	0.134741	0.481864	1	1	1
hsa-miR-130a-3p	92.7915	95.6546	97.7713	0.00561241	0.0386672	-0.029329	0.953111	0.691158	0.762055	1	1	1
hsa-miR-130a-5p	2.55725	2.02372	2.73357	-0.318326	-0.394473	0.0940697	0.316483	0.224511	0.783781	1	1	1
hsa-miR-130b-3p	31.0758	28.8508	29.622	-0.0844745	-0.0856012	-0.000163777	0.466013	0.417524	0.998881	1	1	1
hsa-miR-130b-5p	190.804	243.051	236.63	0.183602	0.285631	-0.109066	0.290772	0.136516	0.554293	1	1	1
hsa-miR-132-3p	54.8927	59.0782	65.0656	0.182656	0.0842314	0.109618	0.041541	0.351075	0.233826	1	1	1
hsa-miR-132-5p	10.0284	11.601	12.7187	0.32032	0.106881	0.213139	0.0132208	0.418267	0.119596	1	1	1
hsa-miR-1321	0	0	0	0.242964	0.0177342	0.2321	1	0.993731	1	1	1	1
hsa-miR-1321-5p	0	0	0	0.524705	0.145785	0.376653	0.832866	0.915955	0.91796	1	1	1
hsa-miR-1322	0	0	0	0.030107	-0.199446	0.235516	1	0.890776	1	1	1	1
hsa-miR-1322-5p	0	0	0	0.324217	0.237328	0.101521	1	0.865939	1	1	1	1
hsa-miR-1323	0	0	0	0.38981	0.0830818	0.30825	0.917454	0.968651	1	1	1	1
hsa-miR-1323-3p	0	0	0	-0.575342	-0.46183	-0.171504	0.207784	0.34704	0.659172	1	1	1
hsa-miR-1324	0	0	0	0.942426	-0.412261	1.39528	0.21796	0.410325	0.031044	1	1	1
hsa-miR-1324-5p	0	0	0	0.409306	0.0152993	0.37427	0.942737	0.97871	1	1	1	1
hsa-miR-133a-3p	2.3425	2.90184	4.34155	0.775383	0.488627	0.288285	0.00149288	0.0695179	0.284485	1	1	1
hsa-miR-133a-5p	51.1721	58.1889	78.8626	0.435418	0.110601	0.325439	0.0984899	0.646808	0.203456	1	1	1
hsa-miR-133b	0	0	0	0.760009	-0.265952	1.05114	0.502087	0.755221	0.392727	1	1	1
hsa-miR-133b-5p	1.37742	2.15601	2.8403	0.631391	0.301964	0.344137	0.0639256	0.369486	0.246537	1	1	1
hsa-miR-134-3p	0.618066	0.613139	0.588137	0.0975931	-0.141683	0.263675	0.803217	0.710203	0.486799	1	1	1
hsa-miR-134-5p	1058.16	1192.2	1102.59	-0.0482131	-0.0195932	-0.0354736	0.809859	0.921295	0.847322	1	1	1
hsa-miR-1343-3p	9.51028	8.64034	10.6231	0.190565	-0.073985	0.247069	0.289468	0.696502	0.149521	1	1	1
hsa-miR-1343-5p	0	0	0	0.0965543	-0.208134	0.315603	0.872521	0.839637	0.723176	1	1	1
hsa-miR-135a-2-3p	0	0	0	0.469424	-0.0512648	0.526849	0.779873	0.984883	0.77967	1	1	1
hsa-miR-135a-3p	1.53005	1.92091	1.08597	-0.283277	0.0554623	-0.2731	0.381793	0.853102	0.43445	1	1	1
hsa-miR-135a-5p	4.72974	5.58528	5.69433	0.423719	0.397952	0.0182145	0.0286534	0.0699041	0.937738	1	1	1
hsa-miR-135b-3p	0	0	0	0.514797	0.0935772	0.44762	0.829292	0.932148	0.896465	1	1	1
hsa-miR-135b-5p	0	0	0	0.310465	-0.180654	0.519701	0.668669	0.78674	0.450623	1	1	1
hsa-miR-136-3p	55.9467	59.6737	64.9092	-0.0385244	-0.0651788	0.0168852	0.868433	0.771674	0.942115	1	1	1
hsa-miR-136-5p	47.8702	62.3285	59.0087	0.170436	0.27679	-0.10871	0.403589	0.197914	0.614196	1	1	1
hsa-miR-137-3p	0.236581	0.689574	0.918662	0.280852	-0.507337	0.812198	0.649804	0.385541	0.133936	1	1	1
hsa-miR-137-5p	0	0	0	0.46368	0.0172565	0.465288	0.847951	0.974953	0.889555	1	1	1
hsa-miR-138-1-3p	0	0	0	-0.224587	-0.32881	0.105208	0.577959	0.511692	1	1	1	1
hsa-miR-138-2-3p	0	0	0	0.470367	-0.273055	0.759442	0.594242	0.753248	0.385821	1	1	1
hsa-miR-138-5p	0	0	0	0.206416	-0.15534	0.440442	0.772558	0.704394	0.380481	1	1	1
hsa-miR-139-3p	249.79	196.77	224.591	-0.0868703	-0.0416297	-0.0402975	0.598622	0.802415	0.814644	1	1	1
hsa-miR-139-5p	2337.12	2252.46	2166.77	-0.0812039	-0.0763783	0.0140129	0.527852	0.548461	0.919282	1	1	1
hsa-miR-140-3p	8559.62	9034.78	8251.92	-0.00791014	-0.0460069	0.0492891	0.937433	0.645668	0.619304	1	1	1
hsa-miR-140-5p	449.574	444.75	459.293	0.0210061	-0.0106081	0.0339244	0.79624	0.904429	0.721725	1	1	1
hsa-miR-141-3p	1.66651	1.46987	1.54378	0.266911	0.216012	0.0560263	0.449173	0.466306	0.867403	1	1	1
hsa-miR-141-5p	0	0	0	-0.117675	0.0206735	-0.126496	0.750092	1	0.785188	1	1	1
hsa-miR-142-3p	1751.47	1689.62	1778.5	-0.0103799	-0.013178	0.00775074	0.924195	0.899753	0.946748	1	1	1
hsa-miR-142-5p	4240.58	3817.24	4016.39	-0.138819	-0.156035	0.0245517	0.154523	0.0890441	0.807707	1	1	1
hsa-miR-143-3p	5007.33	7317.06	5865.39	0.0927982	0.580751	-0.503399	0.548352	0.00166801	0.00304146	1	1	1
hsa-miR-143-5p	19.3351	21.4442	21.1264	0.304177	0.447348	-0.15183	0.120218	0.019503	0.456266	1	1	1
hsa-miR-144-3p	46.646	41.8318	39.7453	-0.100658	-0.0822888	-0.00914353	0.611747	0.621941	0.962884	1	1	1
hsa-miR-144-5p	43.4186	36.6835	36.6763	-0.23492	-0.0165104	-0.198862	0.198295	0.917655	0.229348	1	1	1
hsa-miR-145-3p	53.596	68.7844	54.7506	0.104417	0.344961	-0.25484	0.476633	0.0231278	0.0981596	1	1	1
hsa-miR-145-5p	90.0095	97.0497	98.4525	0.353164	0.243896	0.11517	0.0520458	0.177802	0.541618	1	1	1
hsa-miR-1468-5p	8.2071	10.8082	10.3632	0.238313	0.301793	-0.0995471	0.14593	0.0630089	0.472421	1	1	1
hsa-miR-1469	0	0	0	0.242964	0.0217148	0.239175	1	0.978732	1	1	1	1
hsa-miR-1469-3p	0	0	0	-0.183909	0.410141	-0.590785	0.61029	0.458203	0.258855	1	1	1
hsa-miR-146a-3p	19.4148	13.0377	5.60249	-0.815083	-0.352161	-0.441841	0.045419	0.369985	0.277322	1	1	1
hsa-miR-146a-5p	35334.5	36585	36393.1	-0.117441	-0.0765695	-0.0386426	0.159954	0.355778	0.623431	1	1	1
hsa-miR-146b-3p	76.6274	72.2181	74.512	-0.0397414	-0.0641698	0.0360744	0.699775	0.512821	0.702103	1	1	1
hsa-miR-146b-5p	13922.2	14390.2	13647.9	-0.0616125	-0.0491122	-0.00772924	0.48308	0.576548	0.919421	1	1	1
hsa-miR-1470	0	0	0	0.0924098	0.455646	-0.269397	1	0.587808	0.714762	1	1	1
hsa-miR-1470-3p	0	0	0	-0.181587	-0.0989562	-0.0726166	0.655672	0.848218	0.867294	1	1	1
hsa-miR-1471	0	0	0	0.310764	0.234464	0.0879432	1	0.87816	1	1	1	1
hsa-miR-1471-3p	0	0	0	0.102765	0.0682601	-0.021845	1	0.907361	0.887274	1	1	1
hsa-miR-147a	0	0	0	-0.0241701	-0.00150353	0.0208974	0.967919	1	1	1	1	1
hsa-miR-147a-5p	0	0	0	-0.133058	-0.22087	0.0877883	0.879023	0.842975	1	1	1	1
hsa-miR-147b-3p	0.434562	0.927759	0.912149	0.358591	0.407223	-0.0498819	0.372032	0.286417	0.894139	1	1	1
hsa-miR-147b-5p	0	0	0	0.671049	0.235861	0.480697	0.187665	0.613261	0.330411	1	1	1
hsa-miR-148a-3p	54444.5	54720.2	44795.4	-0.471983	-0.173011	-0.294582	0.000405126	0.205225	0.0181164	0.46819	1	1
hsa-miR-148a-5p	124.048	107.173	93.8078	-0.384274	-0.153102	-0.218622	7.9365e-05	0.0823353	0.0133901	0.137579	1	1
hsa-miR-148b-3p	8015.88	8401.74	7904.29	-0.080198	0.00549208	-0.0767749	0.314497	0.947907	0.381103	1	1	1
hsa-miR-148b-5p	57.9992	54.3239	52.1292	-0.00259072	-0.00447686	-0.00356079	0.974233	0.953358	0.969406	1	1	1
hsa-miR-149-3p	0.597427	0.774799	0.493131	0.272565	0.235723	0.0219056	0.560439	0.535811	1	1	1	1
hsa-miR-149-5p	1.37439	1.34508	1.11447	-0.13649	-0.275683	0.105664	0.663388	0.348062	0.733	1	1	1
hsa-miR-150-3p	30.8256	25.6164	34.358	0.0486966	-0.424159	0.497512	0.803771	0.032392	0.0125824	1	1	1
hsa-miR-150-5p	2094.44	1692.7	2451.4	0.0904186	-0.276934	0.38144	0.679001	0.221719	0.0898377	1	1	1
hsa-miR-151a-3p	74009.5	73475.8	66216	-0.0394935	0.0627353	-0.100523	0.726217	0.584117	0.365059	1	1	1
hsa-miR-151a-5p	355.814	336.335	309.846	-0.123143	-0.0406414	-0.0890731	0.243369	0.707346	0.390237	1	1	1
hsa-miR-151b	0	0	0	0.811587	0.211603	0.557713	0.25327	0.651116	0.424897	1	1	1
hsa-miR-151b-5p	29.8671	26.8993	23.9303	-0.225454	-0.119702	-0.107658	0.0606395	0.324263	0.341438	1	1	1
hsa-miR-152-3p	1871.42	1780.88	1645.95	-0.0994123	-0.0307739	-0.0715287	0.125488	0.642877	0.275329	1	1	1
hsa-miR-152-5p	3.42214	3.26042	3.38517	-0.0147238	-0.246673	0.253271	0.942187	0.213707	0.188065	1	1	1
hsa-miR-153-1-5p	0	0	0	-0.613852	-0.0957892	-0.55259	0.191992	0.849702	0.236054	1	1	1
hsa-miR-153-2-5p	0	0	0	0.582943	-0.013632	0.574898	0.49594	0.951989	0.464135	1	1	1
hsa-miR-153-3p	1.50762	1.52198	1.10633	-0.208033	-0.303724	0.0963661	0.495201	0.307475	0.786874	1	1	1
hsa-miR-1537-3p	0	0	0	0.736554	0.306578	0.401914	0.32121	0.729769	0.470876	1	1	1
hsa-miR-1537-5p	0	0	0	0.393796	0.441259	-0.00571138	0.662206	0.460241	0.94986	1	1	1
hsa-miR-1538	0	0	0	0.161398	-0.119558	0.308251	0.939876	1	0.948307	1	1	1
hsa-miR-1538-5p	4.15326	4.82265	4.95619	0.063744	0.189486	-0.141109	0.755999	0.361605	0.486044	1	1	1
hsa-miR-1539	0	0	0	0.558223	0.0625167	0.481862	0.780631	1	0.65068	1	1	1
hsa-miR-1539-5p	0	0	0	0.383781	0.0825232	0.303866	1	1	0.951753	1	1	1
hsa-miR-154-3p	1.233	1.33806	1.68287	-0.0775585	-0.319371	0.230405	0.841957	0.397565	0.4562	1	1	1
hsa-miR-154-5p	10.1916	7.66738	8.60331	0.0448847	-0.241173	0.277563	0.859307	0.333563	0.237079	1	1	1
hsa-miR-155-3p	0	0	0	0.243096	0.0138345	0.2321	1	0.985922	1	1	1	1
hsa-miR-155-5p	1226.25	1055.17	1198.79	-0.010953	-0.124156	0.116134	0.863927	0.0364905	0.0602052	1	1	1
hsa-miR-1587	0	0	0	0.330912	0.0937454	0.234216	1	0.970285	1	1	1	1
hsa-miR-1587-3p	0	0	0	0.146339	0.122067	0.0213474	1	0.898209	1	1	1	1
hsa-miR-15a-3p	0	0	0	-0.396086	-0.196513	-0.199156	0.42635	0.769976	0.7094	1	1	1
hsa-miR-15a-5p	34.3774	37.304	36.706	-0.0999945	-0.196727	0.104035	0.470003	0.147699	0.394305	1	1	1
hsa-miR-15b-3p	117.521	124.387	112.285	-0.291476	-0.254119	-0.0276057	0.0711202	0.0973836	0.850514	1	1	1
hsa-miR-15b-5p	351.211	331.427	345.587	-0.0836463	-0.15222	0.076267	0.484574	0.211873	0.531953	1	1	1
hsa-miR-16-1-3p	1.23827	1.55917	1.36678	-0.292647	-0.118094	-0.126319	0.337943	0.679727	0.647678	1	1	1
hsa-miR-16-2-3p	1029.38	999.473	990.9	-0.0686225	-0.0301011	-0.0424393	0.404124	0.722758	0.572499	1	1	1
hsa-miR-16-5p	1031.6	1001.21	992.043	-0.0690932	-0.0303473	-0.0426178	0.399178	0.719778	0.569882	1	1	1
hsa-miR-17-3p	11.6705	11.9006	12.3595	0.00706502	-0.102958	0.121065	0.958689	0.392294	0.339247	1	1	1
hsa-miR-17-5p	1878.29	1825.07	1891.2	-0.10213	-0.0639995	-0.0329365	0.367663	0.600837	0.756983	1	1	1
hsa-miR-181a-2-3p	202.662	210.421	224.19	0.137264	0.0892302	0.0443279	0.0495104	0.227104	0.457385	1	1	1
hsa-miR-181a-3p	1952.1	2029.87	1954.87	0.101698	0.0994418	0.00273299	0.371091	0.283264	0.980396	1	1	1
hsa-miR-181a-5p	299.351	317.834	303.365	0.046344	0.0860487	-0.040243	0.466654	0.174065	0.483758	1	1	1
hsa-miR-181b-2-3p	1.45481	1.59013	1.45168	-0.126254	-0.0886403	-0.0415141	0.670634	0.755151	0.886203	1	1	1
hsa-miR-181b-3p	234.894	242.303	230.796	-0.0306543	-0.00187996	-0.0322445	0.759773	0.982903	0.753429	1	1	1
hsa-miR-181b-5p	3.14497	2.7432	2.76054	-0.100641	-0.131003	0.0502996	0.687567	0.579862	0.837177	1	1	1
hsa-miR-181c-3p	64.9421	59.257	57.2286	-0.122934	-0.068512	-0.0556061	0.239613	0.515936	0.615319	1	1	1
hsa-miR-181c-5p	12.4376	12.1154	11.7382	-0.0555322	-0.0705347	0.00418495	0.68883	0.588288	0.977652	1	1	1
hsa-miR-181d-3p	0	0	0	0.571624	0.359045	0.194711	0.314798	0.459667	0.757986	1	1	1
hsa-miR-181d-5p	222.686	233.791	227.068	-0.0216486	0.0434917	-0.072693	0.763244	0.540719	0.227256	1	1	1
hsa-miR-182-3p	1.62951	1.36565	1.10402	-0.0870942	0.0501233	-0.123794	0.761813	0.851842	0.667496	1	1	1
hsa-miR-182-5p	828.207	931.425	989.001	0.119686	0.102783	0.0133165	0.264705	0.361001	0.903169	1	1	1
hsa-miR-1825	0	0	0	0.221852	-0.30615	0.504615	1	0.567951	0.504689	1	1	1
hsa-miR-1825-5p	0	0	0	0.153244	-0.134857	0.307827	1	0.929376	0.934565	1	1	1
hsa-miR-1827	0	0	0	0.394253	-0.274908	0.690013	0.687268	0.697107	0.419996	1	1	1
hsa-miR-1827-5p	6.85576	6.75198	6.078	-0.108487	-0.0254134	-0.108506	0.508	0.872003	0.471238	1	1	1
hsa-miR-183-3p	0	0	0	0.0794014	-0.0765351	0.0964544	1	1	1	1	1	1
hsa-miR-183-5p	119.032	102.069	121.73	-0.0280742	-0.0688317	0.0514859	0.849192	0.661211	0.733432	1	1	1
hsa-miR-184	0	0	0	-0.342898	-0.332119	-0.0434083	0.675764	1	0.829475	1	1	1
hsa-miR-184-5p	1.11026	1.45949	1.36678	-0.0770932	-0.252554	0.292154	0.896912	0.626495	0.548214	1	1	1
hsa-miR-1843	147.795	175.802	175.209	0.168229	0.205356	-0.0442177	0.0574349	0.0284078	0.638096	1	1	1
hsa-miR-1843-3p	574.626	612.003	582.228	0.0910921	0.119447	-0.0316373	0.176144	0.0488486	0.601541	1	1	1
hsa-miR-185-3p	486.149	460.153	484.428	-0.0224954	-0.0916881	0.0692948	0.739419	0.160148	0.23702	1	1	1
hsa-miR-185-5p	5389.82	5643.15	5450.73	-0.136287	-0.10873	-0.0280625	0.218252	0.331614	0.794031	1	1	1
hsa-miR-186-3p	0	0.198769	0	-0.0180025	0.102015	-0.124644	0.910619	0.782922	0.660901	1	1	1
hsa-miR-186-5p	1827.2	1679.68	1657.42	-0.126085	-0.172286	0.0490719	0.207134	0.088942	0.627435	1	1	1
hsa-miR-187-3p	1.30932	1.45872	1.58659	0.189882	0.0395492	0.17442	0.551263	0.896706	0.569688	1	1	1
hsa-miR-187-5p	0	0	0	-0.239754	0.303264	-0.576982	0.589977	0.536466	0.205906	1	1	1
hsa-miR-188-3p	0	0	0	0.141304	0.351747	-0.190694	1	0.488637	0.56504	1	1	1
hsa-miR-188-5p	0.642732	0.50324	0	-0.509802	-0.0499723	-0.460037	0.15655	0.880234	0.198931	1	1	1
hsa-miR-18a-3p	32.1033	31.6469	30.2401	0.117461	0.00373185	0.103057	0.268959	0.973146	0.334229	1	1	1
hsa-miR-18a-5p	54.4806	56.1582	53.8169	0.054774	0.109703	-0.0498183	0.515792	0.144381	0.522207	1	1	1
hsa-miR-18b-3p	0.555899	0.620689	0.684025	0.437468	0.39297	0.108926	0.305213	0.325191	0.849987	1	1	1
hsa-miR-18b-5p	0.956018	0.812121	1.10402	-0.159722	-0.342777	0.187005	0.625466	0.305429	0.622723	1	1	1
hsa-miR-1908-3p	2.28841	2.4674	2.52193	0.0997922	-0.0167684	0.105643	0.686278	0.9395	0.629715	1	1	1
hsa-miR-1908-5p	85.2235	80.5285	83.6621	-0.0213096	0.00529923	-0.0375654	0.890645	0.972632	0.796856	1	1	1
hsa-miR-1909-3p	0	0	0	-0.380189	-0.604103	0.292137	0.308638	0.188636	0.888583	1	1	1
hsa-miR-1909-5p	0	0	0	-0.109516	-0.0961408	-0.0575702	0.765905	0.828678	0.857852	1	1	1
hsa-miR-190a-3p	0	0	0	0.080984	-0.183159	0.297656	1	0.870148	1	1	1	1
hsa-miR-190a-5p	10.2891	10.3357	10.3118	0.0659774	0.172642	-0.12882	0.735599	0.415181	0.546844	1	1	1
hsa-miR-190b-5p	8.22875	8.83542	9.79036	0.0401506	-0.0189328	0.0836853	0.756747	0.879845	0.468745	1	1	1
hsa-miR-191-3p	55.3384	54.7901	50.4896	0.0272578	0.0927783	-0.0661637	0.805594	0.358811	0.486051	1	1	1
hsa-miR-191-5p	29051.4	28308.9	30642.1	0.0134693	-0.0645815	0.079429	0.817577	0.31149	0.106637	1	1	1
hsa-miR-1910-3p	0	0	0	0.235927	-0.189444	0.38483	0.865377	0.680344	0.63761	1	1	1
hsa-miR-1910-5p	0	0	0	0.229344	0.219982	0.0169506	1	0.830332	1	1	1	1
hsa-miR-1911-3p	0	0	0	0.311488	0.0182934	0.307637	1	0.981088	1	1	1	1
hsa-miR-1911-5p	0	0	0	0.181117	-0.119536	0.304603	1	1	1	1	1	1
hsa-miR-1912-3p	0	0	0	0.321906	0.0168655	0.321914	0.903675	0.9937	0.899108	1	1	1
hsa-miR-1912-5p	0	0	0	0.207118	-0.291594	0.524803	1	0.770167	0.835301	1	1	1
hsa-miR-1913	0.175695	0	0	-0.425287	-0.308728	-0.117602	0.369132	0.460194	0.83649	1	1	1
hsa-miR-1913-5p	0	0	0	0.558785	0.210773	0.336845	0.673733	0.805114	0.827007	1	1	1
hsa-miR-1914-3p	0	0	0	0.355644	-0.173339	0.534061	0.745817	0.913597	0.65255	1	1	1
hsa-miR-1914-5p	1.3175	1.5641	1.58327	0.0797332	-0.0085181	0.0737931	0.787481	0.976248	0.793158	1	1	1
hsa-miR-1915-3p	0	0	0	-0.0137477	-0.0375041	-0.000476188	0.922205	0.919575	0.98683	1	1	1
hsa-miR-1915-5p	0	0	0	0.3771	0.226272	0.167471	0.876555	0.857882	1	1	1	1
hsa-miR-192-3p	0	0	0	0.0555241	-0.128291	0.190653	1	0.836387	0.904582	1	1	1
hsa-miR-192-5p	825.918	830.927	827.157	-0.108697	-0.0635868	-0.0366841	0.279923	0.52594	0.658634	1	1	1
hsa-miR-193a-3p	0	0	0	0.173577	-0.139089	0.306829	1	0.872477	0.896581	1	1	1
hsa-miR-193a-5p	11.1315	10.971	12.227	0.281327	0.0710952	0.197467	0.113334	0.61904	0.265732	1	1	1
hsa-miR-193b-3p	0.517152	0	0	-0.184007	-0.435771	0.345446	0.643098	0.315472	0.566075	1	1	1
hsa-miR-193b-5p	0	0	0	-0.0330986	-0.343754	0.428555	0.892524	0.427067	0.433031	1	1	1
hsa-miR-194-1-3p	44.8443	44.099	39.5512	-0.042805	-0.044497	0.011755	0.733997	0.683095	0.929404	1	1	1
hsa-miR-194-3p	49.9977	42.7548	44.8455	-0.096381	-0.149826	0.0659068	0.472902	0.195734	0.617448	1	1	1
hsa-miR-194-5p	2.02498	1.81651	2.17585	0.0326812	-0.178145	0.211089	0.891323	0.438553	0.373943	1	1	1
hsa-miR-195-3p	5.92364	6.45023	6.04451	-0.0538568	0.0479402	-0.114844	0.770762	0.790401	0.547932	1	1	1
hsa-miR-195-5p	11.9064	10.3137	10.2525	-0.193157	-0.121464	-0.0524918	0.123014	0.331086	0.69801	1	1	1
hsa-miR-196a-1-3p	0	0	0	0.188687	0.024747	0.163342	1	1	1	1	1	1
hsa-miR-196a-3p	2.81632	2.72029	3.07262	0.130617	0.134615	-0.0142605	0.596941	0.562585	0.95119	1	1	1
hsa-miR-196a-5p	0	0.423978	0	-0.534195	0.0647503	-0.795923	0.233735	0.879677	0.0964261	1	1	1
hsa-miR-196b-3p	0	0	0	-0.159447	-0.397591	0.239542	0.725663	0.553604	1	1	1	1
hsa-miR-196b-5p	116.335	117.107	122.475	-0.00057473	-0.0173651	0.0232719	0.99334	0.823745	0.749615	1	1	1
hsa-miR-197-3p	454.167	471.798	520.571	0.197851	0.0556799	0.138533	0.0685798	0.599942	0.186633	1	1	1
hsa-miR-197-5p	1.22012	1.50972	1.07065	0.0216637	0.147594	-0.140529	0.945785	0.603623	0.630076	1	1	1
hsa-miR-1972	0	0	0	-0.0242647	-0.224033	0.258833	0.910027	0.718822	0.872481	1	1	1
hsa-miR-1972-5p	1.45481	1.45528	1.57082	0.00724385	0.108223	-0.0464369	0.994207	0.702042	0.866334	1	1	1
hsa-miR-1973	0	0	0	0.0238443	-0.788432	0.560971	1	1	0.887927	1	1	1
hsa-miR-1973-5p	0	0	0	0.638618	0.0907138	0.524139	0.753543	0.958031	0.801859	1	1	1
hsa-miR-1976	0.733019	0.882103	0.799796	0.414393	0.322408	0.132248	0.298922	0.362539	0.732803	1	1	1
hsa-miR-1976-5p	0.778981	1.12718	1.05733	0.328627	0.384669	-0.029676	0.373692	0.246099	0.919907	1	1	1
hsa-miR-198	0	0	0	0.243096	-0.0581956	NA	1	0.972894	NA	1	1	NA
hsa-miR-198-3p	0	0	0	-0.155971	-0.235106	0.0471626	0.653127	0.669802	1	1	1	1
hsa-miR-199a-3p, hsa-miR-199b-3p	24102.8	26744.9	24724.9	-0.134881	-0.0688741	-0.0670945	0.262357	0.544916	0.570793	1	1	1
hsa-miR-199a-5p	12700.2	13967.7	12495.1	-0.170183	-0.082695	-0.0891935	0.188092	0.50781	0.490876	1	1	1
hsa-miR-199b-5p	66.6391	70.8373	69.8764	-0.0608273	-0.0214516	-0.0308051	0.590375	0.847895	0.758606	1	1	1
hsa-miR-19a-3p	204.226	210.853	223.602	-0.0392219	-0.0940619	0.0579278	0.677894	0.29464	0.521793	1	1	1
hsa-miR-19a-5p	0	0	0	0.165327	-0.0236435	0.200461	1	0.938102	1	1	1	1
hsa-miR-19b-3p	1.2175	1.10999	0.854412	-0.218419	-0.0837629	-0.132732	0.498873	0.793074	0.68625	1	1	1
hsa-miR-19b-5p	0.937021	0.899253	0.802356	-0.129516	0.00205901	-0.157	0.689091	0.99759	0.6434	1	1	1
hsa-miR-200a-3p	20.9822	22.178	18.2639	0.181882	0.0206084	0.157452	0.332441	0.875041	0.398575	1	1	1
hsa-miR-200a-5p	3.0435	3.27306	3.69297	0.158805	0.0229014	0.114153	0.488237	0.920882	0.589239	1	1	1
hsa-miR-200b-3p	150.667	153.803	149.349	-0.0346069	0.0403667	-0.0685638	0.559888	0.532853	0.301276	1	1	1
hsa-miR-200b-5p	1.29807	1.77688	1.82081	0.177718	0.404319	-0.142196	0.547487	0.137792	0.628819	1	1	1
hsa-miR-200c-3p	352.28	348.049	353.644	0.0572413	0.0285594	0.0317084	0.308953	0.649315	0.532214	1	1	1
hsa-miR-200c-5p	0	0	0	-0.0687359	-0.524836	0.471729	0.874692	0.65256	0.837212	1	1	1
hsa-miR-202-3p	0	0	0	0.325094	-0.111033	0.475151	0.723178	0.8513	0.600964	1	1	1
hsa-miR-202-5p	0	0	0	0.843052	0.835103	0.17411	0.293625	0.654442	0.70688	1	1	1
hsa-miR-203a-3p	12.9094	11.181	9.93826	0.301249	0.0818145	0.176415	0.279437	0.761301	0.560124	1	1	1
hsa-miR-203a-5p	0	0	0	-0.0327734	-0.121811	0.096266	0.930137	0.916323	1	1	1	1
hsa-miR-203b-3p	0	0	0	0.848963	0.230315	0.608711	0.653505	0.858624	0.722352	1	1	1
hsa-miR-203b-5p	0	0	0	0.168312	-0.198578	0.376376	1	0.887392	0.923301	1	1	1
hsa-miR-204-3p	1.01584	0.811153	1.39347	-0.0395981	-0.344031	0.210168	0.920986	0.41917	0.579845	1	1	1
hsa-miR-204-5p	13.4837	13.6188	13.5699	0.00281838	0.104659	-0.112999	0.991295	0.681602	0.631096	1	1	1
hsa-miR-205-3p	0	0	0	0.387776	NA	0.376549	0.928959	NA	0.929107	1	NA	1
hsa-miR-205-5p	0.175695	0.689277	0	-0.229371	0.465092	-0.647278	0.561218	0.250073	0.10942	1	1	1
hsa-miR-2052	0	0	0	0.251209	0.0126422	0.214329	0.916166	0.964551	1	1	1	1
hsa-miR-2052-3p	0	0	0	0.248036	-0.0546855	0.307792	1	0.972076	0.992205	1	1	1
hsa-miR-2053	0	0	0	0.430353	-0.461372	0.885002	0.635753	0.461623	0.210861	1	1	1
hsa-miR-2053-5p	0	0	0	0.253423	-0.0585976	0.307637	0.992619	1	1	1	1	1
hsa-miR-2054-3p	0	0	0	0.253678	-0.0508738	NA	1	0.960775	NA	1	1	NA
hsa-miR-206	0	0	0	0.181312	-0.0757297	0.281405	1	0.934355	0.952656	1	1	1
hsa-miR-206-5p	1.78631	1.38194	1.69896	0.281069	-0.224261	0.591348	0.527511	0.611529	0.194005	1	1	1
hsa-miR-208a-3p	0	0	0	0.0904101	-0.199568	0.294784	1	0.838845	1	1	1	1
hsa-miR-208a-5p	0	0	0	0.258784	-0.131543	0.384388	0.926493	0.927108	0.899555	1	1	1
hsa-miR-208b-3p	0	0	0	0.365408	0.174491	0.19975	0.808705	0.855238	1	1	1	1
hsa-miR-208b-5p	0	0	0	NA	0.166166	0.163585	NA	0.912236	1	NA	1	1
hsa-miR-20a-3p	2.47345	2.03234	1.98322	-0.0906415	-0.3118	0.21283	0.725572	0.20589	0.387408	1	1	1
hsa-miR-20a-5p	3146.36	3092.82	3068.9	-0.167813	-0.060164	-0.102148	0.179469	0.645088	0.390787	1	1	1
hsa-miR-20b-3p	1.29807	1.38451	0.772772	-0.415892	0.051317	-0.42271	0.22769	0.869358	0.191529	1	1	1
hsa-miR-20b-5p	88.0206	88.9927	92.896	-0.0708178	-0.0640066	0.00903605	0.582697	0.653678	0.941652	1	1	1
hsa-miR-21-3p	57.1297	47.9954	53.0457	-0.138518	-0.187303	0.0497298	0.240802	0.100799	0.651481	1	1	1
hsa-miR-21-5p	173336	185470	157056	-0.111825	-0.0100573	-0.104488	0.319807	0.931491	0.318799	1	1	1
hsa-miR-210-3p	74.7941	73.6987	76.0158	0.128041	0.103709	0.0365076	0.201132	0.35576	0.778446	1	1	1
hsa-miR-210-5p	0.494222	0.479232	0.566076	0.290343	0.255702	0.0087948	0.476151	0.524527	1	1	1	1
hsa-miR-211-3p	0	0	0	0.213878	-0.277171	0.508268	1	0.825307	0.868243	1	1	1
hsa-miR-211-5p	1.47011	0.633008	1.11252	-0.233869	-0.506161	0.199656	0.450483	0.121677	0.577693	1	1	1
hsa-miR-2110	23.6791	30.4952	34.6355	0.323214	0.230193	0.0832528	0.1054	0.260877	0.680869	1	1	1
hsa-miR-2110-3p	100.002	102.826	103.559	0.0464219	-0.0239036	0.0587927	0.651327	0.833557	0.590866	1	1	1
hsa-miR-2113	0	0	0	0.692921	NA	0.681303	0.72989	NA	0.740603	1	NA	1
hsa-miR-2113-5p	0	0	0	0.669861	0.148966	0.558415	0.495964	0.934384	0.53658	1	1	1
hsa-miR-2114-3p	0	0	0	0.301069	0.0936876	0.237315	1	0.916879	1	1	1	1
hsa-miR-2114-5p	0	0	0	0.821922	0.378876	0.459132	0.498641	0.778583	0.638221	1	1	1
hsa-miR-2115-3p	0.663756	0.593602	0	-0.43205	-0.0898525	-0.334464	0.283997	0.812541	0.377216	1	1	1
hsa-miR-2115-5p	0	0	0	0.516011	0.0671251	0.497572	0.525923	0.907393	0.529242	1	1	1
hsa-miR-2116-3p	0.302614	0.49287	0	0.182042	0.0558585	0.0748939	0.680529	0.879208	0.912148	1	1	1
hsa-miR-2116-5p	0	0	0	0.265024	-0.244637	0.520009	1	0.631468	0.52713	1	1	1
hsa-miR-2117	0	0	0	1.05523	-0.206064	1.23808	0.175681	0.829964	0.133735	1	1	1
hsa-miR-2117-5p	0	0	0	0.316116	0.304668	0.0166693	1	0.712793	1	1	1	1
hsa-miR-212-3p	1.235	1.80124	2.00242	0.434966	0.108108	0.275202	0.143105	0.748993	0.342194	1	1	1
hsa-miR-212-5p	10.9051	12.8702	12.5924	0.30138	0.314064	-0.00423187	0.042255	0.0411288	0.973549	1	1	1
hsa-miR-214-3p	0	0	0.22217	0.283004	-0.290545	0.539306	0.58258	0.532157	0.254637	1	1	1
hsa-miR-214-5p	0	0	0	0.888254	0.00661736	0.798551	0.0987041	1	0.0932116	1	1	1
hsa-miR-215-3p	0	0	0	0.317284	0.306975	0.00996702	0.888615	0.680468	1	1	1	1
hsa-miR-215-5p	30.1629	27.805	28.8937	0.336721	0.127842	0.210796	0.0793714	0.399918	0.294131	1	1	1
hsa-miR-216a-3p	0	0	0	-0.574599	-0.959671	0.402414	0.416017	0.224653	0.806588	1	1	1
hsa-miR-216a-5p	0	0	0	0.177966	0.230196	-0.049696	1	0.902436	0.93834	1	1	1
hsa-miR-216b-3p	0	0	0	0.479262	0.653427	-0.188857	0.54855	0.331609	0.677867	1	1	1
hsa-miR-216b-5p	0	0	0	0.551271	-0.203306	0.752903	0.565111	0.772843	0.414465	1	1	1
hsa-miR-217-3p	0	0	0	0.253678	-0.0508738	NA	1	0.960793	NA	1	1	NA
hsa-miR-217-5p	0	0	0	0.240776	0.298559	-0.0629691	1	0.823883	0.901422	1	1	1
hsa-miR-218-1-3p	0	0	0	0.242964	-0.0542958	NA	1	0.971351	NA	1	1	NA
hsa-miR-218-2-3p	0	0	0	0.0421809	-0.195726	0.239175	1	0.903346	1	1	1	1
hsa-miR-218-5p	0	0	0	0.191144	-0.223251	0.380645	1	0.828416	0.816842	1	1	1
hsa-miR-219a-1-3p	4.7831	5.03113	4.24886	0.174021	-0.0894708	0.246803	0.480419	0.615649	0.310718	1	1	1
hsa-miR-219a-2-3p	0	0	0	0.780933	0.283031	0.498931	0.159241	0.584583	0.354308	1	1	1
hsa-miR-219a-5p	6.83058	6.15473	6.41064	0.258044	0.000620545	0.237557	0.221922	0.996667	0.252646	1	1	1
hsa-miR-219b-3p	0	0	0	0.329749	0.27765	0.0916377	1	0.731791	1	1	1	1
hsa-miR-219b-5p	1.28112	1.23088	0.920191	-0.140932	-0.0597236	-0.109958	0.671012	0.847188	0.735973	1	1	1
hsa-miR-22-3p	4518.47	4368.3	4622.02	0.0632705	0.0108536	0.0531124	0.390977	0.890618	0.497007	1	1	1
hsa-miR-22-5p	207.102	195.799	216.312	-0.0424003	0.00264425	-0.0454429	0.652738	0.979452	0.664359	1	1	1
hsa-miR-221-3p	21374.7	20389.1	19855	-0.0515956	-0.0472028	-0.00699712	0.509508	0.560778	0.91934	1	1	1
hsa-miR-221-5p	552.809	545.72	527.033	0.0209342	-0.0271061	0.0536331	0.805801	0.755872	0.518469	1	1	1
hsa-miR-222-3p	11203.2	10818.6	11190.5	0.0738774	0.0513067	0.0167288	0.605695	0.70919	0.905235	1	1	1
hsa-miR-222-5p	1.24349	1.24439	1.10402	-0.147414	-0.0167172	-0.0893914	0.627355	0.950662	0.766634	1	1	1
hsa-miR-223-3p	8127.02	6704.73	7168.54	-0.0660707	-0.137298	0.0749783	0.676082	0.395729	0.650041	1	1	1
hsa-miR-223-5p	2861.74	2869.15	2743.87	0.00949096	0.0352661	-0.0253164	0.924165	0.713675	0.770696	1	1	1
hsa-miR-224-3p	1.0824	1.0776	1.57414	-0.220842	-0.447731	0.22573	0.550288	0.223163	0.544316	1	1	1
hsa-miR-224-5p	1469.02	1521.79	1426.41	0.00928722	0.208208	-0.185295	0.963346	0.293259	0.349117	1	1	1
hsa-miR-2276-3p	1.0824	1.14605	0.841437	0.0071842	0.0957405	-0.159652	0.983887	0.760793	0.615947	1	1	1
hsa-miR-2276-5p	0	0	0	0.535667	0.401615	0.0618361	0.547345	0.45082	1	1	1	1
hsa-miR-2277-3p	0.970363	0.496689	1.16814	0.239454	-0.320659	0.587428	0.511729	0.387587	0.109376	1	1	1
hsa-miR-2277-5p	13.3661	14.5911	13.5107	-0.0140861	0.0127881	-0.0140341	0.910894	0.913541	0.908939	1	1	1
hsa-miR-2278	0	0	0	0.301027	0.236687	0.0302191	0.653408	0.634297	1	1	1	1
hsa-miR-2278-3p	2.02055	2.41036	2.22079	-0.0664478	0.0638399	-0.0875664	0.786374	0.785346	0.692543	1	1	1
hsa-miR-2355-3p	61.162	62.1109	59.0009	-0.0886044	0.000263136	-0.0897196	0.380036	0.997858	0.361129	1	1	1
hsa-miR-2355-5p	2.56189	2.90583	2.26253	-0.423366	-0.394148	-0.0186777	0.152756	0.120135	0.946309	1	1	1
hsa-miR-2392	0	0	0	0.673178	0.325172	0.355307	0.48175	0.597718	0.766106	1	1	1
hsa-miR-2392-5p	166.55	174.966	162.363	-0.221967	-0.00386272	-0.22681	0.0990046	0.977322	0.091505	1	1	1
hsa-miR-23a-3p	8123.9	7045.02	7673.02	-0.0540446	-0.127875	0.0776281	0.71004	0.393705	0.598432	1	1	1
hsa-miR-23a-5p	28.3374	29.6899	27.1541	0.0270046	0.143422	-0.131502	0.851737	0.341313	0.372614	1	1	1
hsa-miR-23b-3p	3708.93	3546.64	3764.69	0.0993317	0.00184052	0.10336	0.399367	0.988245	0.400087	1	1	1
hsa-miR-23b-5p	16.8044	21.5367	23.0804	0.223037	0.208089	-0.00907618	0.222432	0.216807	0.956151	1	1	1
hsa-miR-23c	0	0	0	0.549559	-0.195617	0.759722	0.565182	0.76342	0.3174	1	1	1
hsa-miR-23c-5p	5.17602	5.0542	5.52182	0.162373	0.198641	-0.0472875	0.51001	0.445686	0.859015	1	1	1
hsa-miR-24-1-5p	11.0129	10.6703	11.3471	0.0505882	0.0336872	-0.0111074	0.677704	0.782877	0.929273	1	1	1
hsa-miR-24-2-5p	231.979	239.401	239.549	0.0056895	0.021619	-0.0144589	0.923547	0.699263	0.763998	1	1	1
hsa-miR-24-3p	236.83	246.299	246.407	0.00934756	0.0222843	-0.0123241	0.872828	0.690383	0.796422	1	1	1
hsa-miR-2467-3p	0	0	0	0.519445	0.320034	0.177891	0.784288	0.872068	0.876134	1	1	1
hsa-miR-2467-5p	0	0	0	-0.0994385	-0.670914	0.623018	0.717284	0.193187	0.605778	1	1	1
hsa-miR-25-3p	10938.3	10985.4	10551.2	-0.0195911	-0.00353195	-0.0177176	0.658242	0.937248	0.694519	1	1	1
hsa-miR-25-5p	30.1121	26.3141	32.0577	0.039174	-0.167287	0.210879	0.675685	0.0611638	0.0139236	1	1	1
hsa-miR-2681-3p	0	0	0	0.0945565	0.0851677	0.0121626	1	0.955294	1	1	1	1
hsa-miR-2681-5p	0	0	0	0.192858	0.126377	0.0807935	1	0.856946	1	1	1	1
hsa-miR-2682-3p	0	0	0	0.246029	0.0864242	0.16336	1	0.966852	1	1	1	1
hsa-miR-2682-5p	0	0	0	0.256648	-0.199266	0.452523	1	0.813887	0.818756	1	1	1
hsa-miR-26a-1-3p	8.76956	9.13519	10.2898	0.092633	0.0349598	0.046907	0.536589	0.816526	0.731833	1	1	1
hsa-miR-26a-2-3p	6.82267	7.72995	8.4906	0.121954	0.00992016	0.121374	0.398793	0.94275	0.345038	1	1	1
hsa-miR-26a-5p	14.7847	16.0796	16.6367	0.0888602	0.0159067	0.0713522	0.450163	0.893109	0.504051	1	1	1
hsa-miR-26b-3p	47.876	46.0236	49.4723	0.0618639	-0.0802578	0.133766	0.585565	0.504392	0.204243	1	1	1
hsa-miR-26b-5p	15363.2	15702	15528.1	-0.10677	-0.101252	-0.00304021	0.390876	0.358849	0.980315	1	1	1
hsa-miR-27a-3p	3700.55	3611.6	3360.77	-0.124757	-0.0848104	-0.0380446	0.232466	0.398512	0.728864	1	1	1
hsa-miR-27a-5p	29.187	28.8802	27.7311	-0.0989247	-0.0353281	-0.0444096	0.460919	0.770228	0.659306	1	1	1
hsa-miR-27b-3p	8835.23	9256.9	8694.35	-0.15519	-0.00950331	-0.137801	0.149427	0.927076	0.219675	1	1	1
hsa-miR-27b-5p	63.4012	65.5143	66.247	0.0628738	0.0873983	-0.0263297	0.415059	0.231662	0.744707	1	1	1
hsa-miR-28-3p	3932.81	3931.88	4062.52	0.0687953	0.0851514	-0.0175881	0.27225	0.169286	0.760284	1	1	1
hsa-miR-28-5p	676.794	660.997	653.946	-0.0653313	0.0105448	-0.0758984	0.400874	0.896353	0.334171	1	1	1
hsa-miR-2861	0.849784	0.633008	0	-0.374185	-0.127447	-0.273987	0.309323	0.712678	0.449717	1	1	1
hsa-miR-2861-5p	1.26043	0.835528	1.22529	0.145694	-0.260213	0.312049	0.656322	0.423975	0.40976	1	1	1
hsa-miR-2909	0	0	0	0.397945	NA	0.381442	0.924144	NA	0.924731	1	NA	1
hsa-miR-2909-3p	0	0.510505	0	0.835723	0.66437	0.189355	0.0888219	0.112128	0.727223	1	1	1
hsa-miR-296-3p	2.07548	2.38567	1.87022	-0.0821739	-0.16794	0.116449	0.77281	0.471197	0.651979	1	1	1
hsa-miR-296-5p	3.18084	2.15367	3.04957	-0.146618	-0.298562	0.188386	0.564927	0.211421	0.486345	1	1	1
hsa-miR-297-3p	0	0	0	-0.11428	-0.00888278	-0.0902596	0.827642	0.975803	0.882885	1	1	1
hsa-miR-298	0	0	0	-0.0611821	-0.27247	0.364636	0.867553	0.738885	0.804784	1	1	1
hsa-miR-298-3p	0	0	0	0.861057	-0.0526683	0.876773	0.192154	0.915668	0.170621	1	1	1
hsa-miR-299-3p	3.03559	4.69105	4.16638	0.0260714	0.0816762	-0.0727951	0.93841	0.790815	0.815222	1	1	1
hsa-miR-299-5p	4.47519	4.60085	3.67259	-0.0463194	-0.0786705	0.0398245	0.862936	0.737413	0.87558	1	1	1
hsa-miR-29a-3p	805.004	717.992	801.595	0.00337281	-0.123378	0.137064	0.97683	0.299154	0.260071	1	1	1
hsa-miR-29a-5p	0	0	0	0.302013	0.0620337	0.19259	0.625824	0.938604	0.819762	1	1	1
hsa-miR-29b-1-5p	0.952339	0.7374	0.97841	0.0499518	-0.35126	0.465899	0.904119	0.309825	0.182386	1	1	1
hsa-miR-29b-2-5p	7.13804	7.57983	6.0346	-0.173556	0.00206107	-0.164331	0.276065	0.989955	0.268665	1	1	1
hsa-miR-29b-3p	8.12403	8.10171	7.56155	-0.149657	-0.0365021	-0.0923429	0.307886	0.812181	0.501514	1	1	1
hsa-miR-29c-3p	15.3245	13.0341	13.0113	-0.144295	-0.343945	0.218799	0.419915	0.041785	0.209258	1	1	1
hsa-miR-29c-5p	45.7179	47.835	46.5967	0.185888	0.0910255	0.101128	0.0531044	0.278416	0.336128	1	1	1
hsa-miR-300	0	0	0	0.433528	0.0428935	0.436493	0.616864	1	0.563608	1	1	1
hsa-miR-300-5p	0	0	0	1.01538	0.464935	0.55873	0.348143	0.632194	0.563973	1	1	1
hsa-miR-301a-3p	5.50774	5.24627	6.02461	0.00299059	0.0168773	-0.00696389	0.984823	0.91287	0.96425	1	1	1
hsa-miR-301a-5p	37.0357	32.3274	31.2787	-0.12713	-0.144129	0.00669004	0.159728	0.124261	0.937162	1	1	1
hsa-miR-301b-3p	6.45273	6.79819	7.18848	0.22804	0.201125	0.0185632	0.124199	0.180021	0.899707	1	1	1
hsa-miR-301b-5p	0.640472	0.530043	0	-0.242186	-0.155325	-0.033791	0.538347	0.717703	0.920001	1	1	1
hsa-miR-302a-3p	0	0	0	0.097816	-0.127586	0.2321	1	0.915343	1	1	1	1
hsa-miR-302a-5p	0	0	0	-0.424154	-0.438917	0.015535	0.380619	0.415619	1	1	1	1
hsa-miR-302b-3p	0	0	0	-0.11572	-0.150435	0.0155978	0.823506	0.786215	1	1	1	1
hsa-miR-302b-5p	0	0	0	0.236787	-0.0538793	0.31346	1	1	1	1	1	1
hsa-miR-302c-5p	0	0	0	0.33218	0.00704283	0.312437	0.905463	1	0.864201	1	1	1
hsa-miR-302d-3p	0	0	0	NA	0.158844	0.159772	NA	0.907437	1	NA	1	1
hsa-miR-302d-5p	0	0	0	0.536066	0.0935772	0.463086	0.839817	0.941953	0.909738	1	1	1
hsa-miR-302e	0	0	0	0.176702	0.307537	-0.130263	1	0.686001	0.816609	1	1	1
hsa-miR-302e-3p	0	0	0	0.117987	0.247968	-0.132779	1	0.739645	0.838696	1	1	1
hsa-miR-302f	0	0	0	0.251084	-0.127195	0.379983	1	0.944054	0.908089	1	1	1
hsa-miR-302f-5p	0	0	0	0.387404	NA	0.376376	0.920661	NA	0.923301	1	NA	1
hsa-miR-3059-3p	0	0	0	0.416059	-0.144356	0.566174	0.799001	0.900811	0.741024	1	1	1
hsa-miR-3059-5p	0	0	0	0.234479	0.0137021	0.252624	1	1	0.976477	1	1	1
hsa-miR-3064-3p	0	0	0	0.489756	-0.318743	0.834028	0.470165	0.668814	0.287808	1	1	1
hsa-miR-3064-5p	8.24571	8.10393	9.08797	0.111024	0.0122075	0.0886011	0.344644	0.923904	0.509177	1	1	1
hsa-miR-3065-3p	0.698085	0.840626	0.576349	-0.261292	-0.181504	-0.0719845	0.449678	0.60073	0.828415	1	1	1
hsa-miR-3065-5p	9.92963	8.41822	8.42651	-0.169303	-0.203743	0.0443952	0.388594	0.280278	0.820711	1	1	1
hsa-miR-3074-3p	2.43509	2.44411	2.95656	0.0897509	0.162824	-0.0387477	0.69937	0.425721	0.869307	1	1	1
hsa-miR-3074-5p	28.5308	27.4414	25.3384	-0.0497474	0.0499743	-0.106687	0.631954	0.607516	0.275305	1	1	1
hsa-miR-3085-3p	0	0	0	0.119699	0.0285093	0.0969483	1	1	1	1	1	1
hsa-miR-3085-5p	0	0	0	0.530496	-0.0476742	0.598428	0.705242	0.976996	0.666676	1	1	1
hsa-miR-30a-3p	390.002	400.812	375.272	-0.0415041	0.0220587	-0.063175	0.704166	0.834487	0.51561	1	1	1
hsa-miR-30a-5p	836.433	716.516	656.76	-0.17856	-0.225077	0.0502833	0.110013	0.0415038	0.645774	1	1	1
hsa-miR-30b-3p	28.1668	30.5018	28.1202	-0.00419928	0.0194642	-0.00568267	0.966297	0.84695	0.946654	1	1	1
hsa-miR-30b-5p	731.197	636.022	670.433	-0.172775	-0.232392	0.0699606	0.361412	0.218883	0.712216	1	1	1
hsa-miR-30c-1-3p	31.8644	35.6139	33.9994	0.037201	0.156779	-0.123212	0.698942	0.102849	0.174143	1	1	1
hsa-miR-30c-2-3p	6.02036	5.39372	5.25178	-0.404421	-0.264173	-0.116282	0.0264534	0.102827	0.498063	1	1	1
hsa-miR-30c-5p	40.7088	43.4451	39.8796	-0.0265942	0.0896148	-0.116403	0.759796	0.28606	0.171976	1	1	1
hsa-miR-30d-3p	30.5794	30.6532	26.653	-0.0463273	0.00961385	-0.0453612	0.783269	0.952221	0.795909	1	1	1
hsa-miR-30d-5p	61120.8	66634.8	68450.1	0.0795983	0.0262497	0.0549435	0.459033	0.799577	0.618538	1	1	1
hsa-miR-30e-3p	3622.98	3650.05	3549.13	-0.0466072	0.00218922	-0.0458462	0.522326	0.976187	0.489394	1	1	1
hsa-miR-30e-5p	5521.43	5135.74	5586.88	-0.0343249	-0.103357	0.0740233	0.650421	0.192882	0.368803	1	1	1
hsa-miR-31-3p	0	0	0	0.0758051	-0.239565	0.309421	1	0.761966	1	1	1	1
hsa-miR-31-5p	4.44035	3.13904	3.45982	-0.0682672	-0.516492	0.50691	0.814599	0.0770721	0.0876058	1	1	1
hsa-miR-3115	0	0	0	0.242964	0.014393	0.235361	1	0.98344	1	1	1	1
hsa-miR-3115-3p	1.88823	1.99631	2.21742	0.165036	0.254649	-0.127365	0.486142	0.267908	0.573676	1	1	1
hsa-miR-3116	0	0	0	0.166977	0.244939	-0.0247634	0.968446	0.81043	0.957657	1	1	1
hsa-miR-3116-5p	0	0	0	0.533434	0.0864236	0.45178	0.837911	0.935791	0.970975	1	1	1
hsa-miR-3117-3p	0	0	0	0.234106	-0.0346736	0.276225	1	0.931332	0.977639	1	1	1
hsa-miR-3117-5p	0	0	0	0.543285	0.307236	0.246648	0.721291	0.760185	0.934093	1	1	1
hsa-miR-3118	0	0	0	-0.508176	-0.874307	0.377894	0.331062	0.108521	0.672838	1	1	1
hsa-miR-3118-2-5p, hsa-miR-3118-3-5p, hsa-miR-3118-4-5p	0	0	0	0.456342	-0.276909	0.609247	1	0.758792	0.823745	1	1	1
hsa-miR-3119	0	0	0	0.879228	0.157975	0.70592	0.470517	0.894475	0.493565	1	1	1
hsa-miR-3119-3p	0	0	0	0.370315	-0.0482568	0.399078	0.814109	0.922504	0.705666	1	1	1
hsa-miR-3120-3p	102.539	106.319	103.519	-0.0222558	-0.0233895	0.00542969	0.654834	0.58859	0.909741	1	1	1
hsa-miR-3120-5p	16.5958	20.3128	17.5848	0.197142	0.297798	-0.122058	0.24239	0.0545621	0.434224	1	1	1
hsa-miR-3121-3p	0.623251	0.958759	0.952375	0.469564	0.569684	-0.162468	0.203827	0.110528	0.644829	1	1	1
hsa-miR-3121-5p	0	0	0	NA	0.086814	0.235361	NA	0.942053	1	NA	1	1
hsa-miR-3122	0	0	0	0.454903	0.165788	0.329764	0.801054	0.862337	0.97123	1	1	1
hsa-miR-3122-3p	0	0	0	0.356485	0.684916	-0.320386	0.90455	0.191065	0.452056	1	1	1
hsa-miR-3123	0	0	0	0.473872	0.219384	0.279065	0.833028	0.889426	1	1	1	1
hsa-miR-3123-5p	0	0	0	0.135525	-0.490457	0.648195	1	0.44891	0.73672	1	1	1
hsa-miR-3124-3p	0	0	0	0.445681	-0.199056	0.654846	1	0.86996	0.791683	1	1	1
hsa-miR-3124-5p	3.6214	3.8255	4.20177	0.140051	-0.0116673	0.143206	0.460262	0.95267	0.473638	1	1	1
hsa-miR-3125	1.25717	1.51964	1.34711	0.371104	0.0887903	0.286327	0.242251	0.769464	0.326225	1	1	1
hsa-miR-3125-3p	0	0	0	0.168511	-0.07166	0.185533	1	0.875798	0.88147	1	1	1
hsa-miR-3126-3p	0	0	0	0.250131	-0.0472842	0.31409	0.925206	0.992208	0.894166	1	1	1
hsa-miR-3126-5p	0	0	0	0.432617	0.298635	0.127177	0.751817	0.646038	1	1	1	1
hsa-miR-3127-3p	5.27717	6.44282	5.41418	0.0570211	0.356849	-0.351112	0.785162	0.0766503	0.0561717	1	1	1
hsa-miR-3127-5p	2.04513	1.5232	1.98284	-0.0255683	-0.347427	0.276718	0.924936	0.155086	0.313122	1	1	1
hsa-miR-3128	0	0	0	0.311344	-0.057637	0.376549	1	0.956238	0.929107	1	1	1
hsa-miR-3128-3p	1.04004	1.33806	0.684025	-0.577166	-0.0410322	-0.496585	0.0991553	0.897484	0.139338	1	1	1
hsa-miR-3129-3p	0	0	0	0.172979	-0.196026	0.376496	1	0.900507	0.936612	1	1	1
hsa-miR-3129-5p	0	0	0	0.302077	0.0769482	0.242893	1	1	0.970747	1	1	1
hsa-miR-3130-3p	0.535759	0.884729	0.484232	0.200798	0.327974	-0.126932	0.690502	0.410216	0.721568	1	1	1
hsa-miR-3130-5p	0.560173	0	0.569852	0.203933	0.0988957	0.0859628	0.6726	0.809908	0.876595	1	1	1
hsa-miR-3131	0	0	0	0.246263	0.371428	-0.133539	1	0.695927	0.806516	1	1	1
hsa-miR-3131-3p	0.762463	0.479908	0	-0.504672	-0.274524	-0.17162	0.274487	0.50367	0.640236	1	1	1
hsa-miR-3132	0	0	0	0.275838	-0.0567519	0.359891	1	0.91463	1	1	1	1
hsa-miR-3132-3p	0	0	0	0.170382	-0.173018	0.367886	1	0.743513	0.58999	1	1	1
hsa-miR-3133	0	0	0	-0.0141043	-0.0251905	0.0133176	0.945245	0.990098	1	1	1	1
hsa-miR-3133-3p	0.456603	0.198769	0	-0.568429	-0.177581	-0.421959	0.188498	0.674882	0.325199	1	1	1
hsa-miR-3134	0	0	0	0.638912	0.0968327	0.533274	0.504712	0.863142	0.660586	1	1	1
hsa-miR-3134-5p	0	0	0	0.513378	0.217833	0.334538	0.512376	0.695921	0.730057	1	1	1
hsa-miR-3135a	1.10701	0.882103	0.572573	-0.271165	-0.0132416	-0.29773	0.454149	0.967593	0.433087	1	1	1
hsa-miR-3135a-3p	2.41568	2.61105	2.66654	0.0403616	0.0270346	0.00614072	0.881534	0.913605	0.979687	1	1	1
hsa-miR-3135b	1.89149	1.92091	1.45168	-0.137932	-0.110639	0.00645809	0.600874	0.64774	0.980708	1	1	1
hsa-miR-3135b-3p	106.109	113.154	110.932	0.169164	0.0948527	0.0762449	0.275318	0.542874	0.63027	1	1	1
hsa-miR-3136-3p	0	0	0	0.317403	0.158399	0.154443	1	1	0.962146	1	1	1
hsa-miR-3136-5p	0.664915	0	0	-0.289936	-0.249848	-0.0287662	0.444226	0.55747	0.901254	1	1	1
hsa-miR-3137	0	0.527272	0	0.477046	0.651664	-0.192651	0.432839	0.132379	0.603259	1	1	1
hsa-miR-3137-3p	0	0	0	0.299409	-0.299122	0.626539	0.785889	0.646723	0.383197	1	1	1
hsa-miR-3138	1.96127	1.7724	1.8168	-0.0149992	-0.128495	0.111732	0.95191	0.63061	0.679099	1	1	1
hsa-miR-3138-5p	9.65007	9.67534	8.34621	-0.106271	0.0246306	-0.122167	0.411856	0.828959	0.322951	1	1	1
hsa-miR-3139	0	0	0	0.161305	0.0816612	0.0948463	1	0.951791	1	1	1	1
hsa-miR-3139-3p	0	0.250204	0	0.317401	0.148804	0.243309	0.579552	0.707695	0.726069	1	1	1
hsa-miR-3140-3p	3.81736	3.27076	3.31206	-0.0301828	0.0108463	-0.0289827	0.877486	0.954423	0.888267	1	1	1
hsa-miR-3140-5p	0	0	0	-0.0641044	-0.478144	0.439474	0.824677	0.423442	0.543589	1	1	1
hsa-miR-3141	0	0	0	0.316975	0.0931863	0.238255	1	0.923367	1	1	1	1
hsa-miR-3141-3p	0.672176	0.229028	0	-1.00283	-0.606737	-0.417502	0.0115247	0.124845	0.245024	1	1	1
hsa-miR-3142	0	0	0	0.789914	0.0278549	0.781225	0.142829	0.942153	0.171202	1	1	1
hsa-miR-3142-5p	0	0	0	0.220754	-0.10791	0.280372	0.87577	0.904875	0.857444	1	1	1
hsa-miR-3143	2.66658	3.03189	3.38522	0.143439	-0.00101406	0.140795	0.665074	0.997583	0.685741	1	1	1
hsa-miR-3143-3p	5.72506	6.60106	6.71105	-0.260225	-0.163859	-0.07435	0.172845	0.401126	0.673878	1	1	1
hsa-miR-3144-3p	1.04004	0.945247	0.446747	0.220078	0.308397	-0.162702	0.551869	0.378039	0.698546	1	1	1
hsa-miR-3144-5p	0	0	0	-0.0827248	0.0657533	-0.145735	0.840679	0.85536	0.692889	1	1	1
hsa-miR-3145-3p	0	0	0	-0.322644	-0.0356425	-0.262904	0.567665	0.903973	0.725121	1	1	1
hsa-miR-3145-5p	0	0	0	0.316975	0.0143936	0.304221	1	0.994113	1	1	1	1
hsa-miR-3146	0	0	0	-1.27818	-2.21286	0.227101	0.219508	0.641439	0.859885	1	1	1
hsa-miR-3146-5p	1.8833	1.60764	1.68253	-0.267847	-0.233505	-0.0138463	0.322767	0.373378	0.95749	1	1	1
hsa-miR-3147	0	0	0	0.260257	-0.122235	0.334796	0.729725	0.800247	0.615239	1	1	1
hsa-miR-3147-3p	0	0	0	1.36629	-0.0546517	1.48664	0.12591	0.962111	0.10457	1	1	1
hsa-miR-3148	0	0	0	0.180796	-0.195331	0.376353	1	0.780399	0.871621	1	1	1
hsa-miR-3148-3p	0	0	0	0.311563	-0.0615091	0.376564	1	0.877078	0.770661	1	1	1
hsa-miR-3149	0	0	0	0.355396	0.0216064	0.326456	0.764946	1	0.747315	1	1	1
hsa-miR-3149-5p	0.961641	0.9876	1.22529	0.285993	-0.0503087	0.251554	0.393398	0.897615	0.483215	1	1	1
hsa-miR-3150a-3p	0	0	0	0.135472	-0.0678431	0.199276	1	0.943162	0.914006	1	1	1
hsa-miR-3150a-5p	2.67077	3.31789	3.16911	0.0743584	0.251043	-0.21179	0.760458	0.318045	0.387314	1	1	1
hsa-miR-3150b-3p	0.806545	0	0	-0.684379	-0.492336	-0.111781	0.0861618	0.207513	0.785452	1	1	1
hsa-miR-3150b-5p	0	0	0	0.508066	-0.0548255	0.555053	0.70565	0.957926	0.687333	1	1	1
hsa-miR-3151-3p	0.37343	0.250204	0	0.0575245	-0.202166	0.252132	0.894831	0.661583	0.608421	1	1	1
hsa-miR-3151-5p	0	0	0	0.34954	-0.34631	0.708559	0.853499	0.763186	0.715029	1	1	1
hsa-miR-3152-3p	0	0	0	0.182607	0.0187465	0.154534	1	0.976514	1	1	1	1
hsa-miR-3152-5p	0	0	0	0.664744	-0.129081	0.831053	0.386226	0.828562	0.272183	1	1	1
hsa-miR-3153	0	0	0	-0.209405	-0.49437	0.261413	0.669842	0.47371	1	1	1	1
hsa-miR-3153-5p	0	0	0	0.182807	0.242568	-0.0586495	1	0.811849	0.897001	1	1	1
hsa-miR-3154	0	0	0	-0.316753	-0.121305	-0.158123	0.42933	0.811087	0.635282	1	1	1
hsa-miR-3154-5p	0.175695	0	0	-0.335353	-0.456887	0.120688	0.380348	0.285709	0.943976	1	1	1
hsa-miR-3155a	0.692847	0.96861	0.984434	0.286889	0.299001	0.0268491	0.42146	0.37029	0.934673	1	1	1
hsa-miR-3155a-5p	0	0	0	0.228129	-0.460161	0.683621	0.785563	0.315818	0.245469	1	1	1
hsa-miR-3155b	0	0	0	0.268927	-0.198077	0.455323	1	0.79969	0.763433	1	1	1
hsa-miR-3155b-5p	0	0.842569	0	0.543845	0.804708	-0.282471	0.240443	0.0430367	0.399948	1	1	1
hsa-miR-3156-3p	0	0	0	0.698135	0.172859	0.526393	0.640038	0.860349	0.723929	1	1	1
hsa-miR-3156-5p	0	0	0	0.282816	-0.355083	0.608659	1	0.61869	0.612349	1	1	1
hsa-miR-3157-3p	2.08134	1.9242	2.10572	0.00144913	0.134149	-0.086533	0.99508	0.583446	0.739383	1	1	1
hsa-miR-3157-5p	1.20713	1.55282	1.25714	0.0879341	0.263497	-0.153431	0.767475	0.370338	0.589758	1	1	1
hsa-miR-3158-3p	15.0578	14.7459	14.5327	-0.169845	-0.00294036	-0.150122	0.280292	0.98515	0.315337	1	1	1
hsa-miR-3158-5p	13.4792	14.9174	13.8767	0.042383	0.151343	-0.106415	0.77107	0.277853	0.466719	1	1	1
hsa-miR-3159	13.2059	13.1589	12.2268	0.0241566	0.0606793	-0.0177233	0.828046	0.536717	0.867062	1	1	1
hsa-miR-3159-3p	2.04967	1.53103	1.56281	-0.246534	-0.389278	0.162557	0.342816	0.12788	0.555978	1	1	1
hsa-miR-3160-3p	0	0	0	0.230929	-0.279937	0.492124	0.709476	0.54511	0.336063	1	1	1
hsa-miR-3160-5p	0	0	0	0.652276	-0.147751	0.797476	0.269387	0.825763	0.19998	1	1	1
hsa-miR-3161	0	0	0	-0.0571443	-0.214017	0.162761	0.934608	0.856062	1	1	1	1
hsa-miR-3161-3p	0	0	0	0.380765	-0.0140566	0.34683	0.676248	0.988551	0.734797	1	1	1
hsa-miR-3162-3p	0	0	0	0.322958	0.165775	0.15177	1	0.950745	1	1	1	1
hsa-miR-3162-5p	0	0	0	0.667147	0.00933224	0.680408	0.493749	1	0.415191	1	1	1
hsa-miR-3163	0	0	0	0.511723	0.155622	0.342332	0.696996	0.880317	0.818146	1	1	1
hsa-miR-3163-3p	0	0	0	0.44349	-0.224545	0.656635	0.534718	0.706001	0.280605	1	1	1
hsa-miR-3164	0.733019	0.483726	0	-0.918309	-0.768534	-0.150517	0.0512366	0.107588	0.756068	1	1	1
hsa-miR-3164-3p	2.77454	2.7432	2.63172	-0.0404926	-0.028793	0.0169276	0.861118	0.898752	0.937713	1	1	1
hsa-miR-3165	0	0	0	0.288739	0.111599	0.158225	0.914317	0.836684	1	1	1	1
hsa-miR-3165-3p	0	0	0	0.323782	-0.0191515	0.418431	0.745688	1	0.877054	1	1	1
hsa-miR-3166	4.15107	4.09114	4.57435	0.177186	0.0233995	0.119619	0.303937	0.883621	0.477183	1	1	1
hsa-miR-3166-5p	3.26	3.72735	3.44807	0.112791	0.234003	-0.135214	0.590948	0.185316	0.481682	1	1	1
hsa-miR-3167	0	0	0	0.297996	0.0863041	0.239359	0.91505	1	0.851866	1	1	1
hsa-miR-3167-5p	0	0	0	0.0493563	0.24434	-0.183601	1	0.818942	0.751091	1	1	1
hsa-miR-3168	0	0	0	-0.145523	-0.166215	0.0907067	0.669289	0.734767	1	1	1	1
hsa-miR-3168-3p	1.54753	1.58018	2.17315	0.316759	0.299985	0.0138355	0.541941	0.594391	0.980248	1	1	1
hsa-miR-3169	0.981594	0.981828	1.14634	0.657025	0.374252	0.270687	0.0541699	0.319321	0.464018	1	1	1
hsa-miR-3169-3p	0	0	0	0.698513	0.430245	0.289409	0.306509	0.530827	0.736987	1	1	1
hsa-miR-3170	0	0	0	0.45642	0.0593901	0.410264	0.59717	1	0.643875	1	1	1
hsa-miR-3170-3p	0	0	0	0.413827	0.519889	-0.15456	0.40047	0.258552	0.697005	1	1	1
hsa-miR-3171	0	0	0	0.387776	0.0901558	0.304375	0.904906	0.962301	0.95399	1	1	1
hsa-miR-3171-3p	0	0	0	0.1669	0.221544	-0.0331498	1	0.702365	0.894483	1	1	1
hsa-miR-3173-3p	0.537886	0.454237	0	0.189984	0.00867624	0.168369	0.6905	1	0.712555	1	1	1
hsa-miR-3173-5p	3.96573	3.32445	3.81177	-0.134764	-0.0727432	-0.0847138	0.531135	0.764365	0.712437	1	1	1
hsa-miR-3174	0	0	0	0.193376	-0.243843	0.459208	1	0.776095	0.838302	1	1	1
hsa-miR-3174-3p	8.78886	8.77493	10.0571	-0.080494	-0.00513784	-0.05819	0.645562	0.971276	0.736753	1	1	1
hsa-miR-3175	0	0	0	-0.183775	0.38641	-0.58902	0.715879	0.591141	0.370205	1	1	1
hsa-miR-3175-3p	1.3996	1.6676	1.41973	-0.347145	0.0983526	-0.426819	0.302851	0.750901	0.151993	1	1	1
hsa-miR-3176	0	0	0	0.478406	-0.11004	0.584915	0.541387	1	0.428982	1	1	1
hsa-miR-3176-5p	2.74748	2.28201	2.11466	-0.340892	-0.408979	0.122592	0.257524	0.118826	0.713092	1	1	1
hsa-miR-3177-3p	56.4914	55.0657	57.2418	0.0635553	0.00644045	0.0483343	0.538585	0.948685	0.636393	1	1	1
hsa-miR-3177-5p	0.512562	0	0	0.176264	-0.158745	0.346213	0.717873	0.6955	0.451218	1	1	1
hsa-miR-3178	0	0	0	-0.181487	-0.314237	0.13335	0.665473	0.699123	1	1	1	1
hsa-miR-3178-3p	0.859331	0	0.378234	-0.359144	-0.140696	-0.070743	0.369546	0.75385	0.890155	1	1	1
hsa-miR-3179	0	0	0	0.0296804	0.282155	-0.202805	1	0.538842	0.585583	1	1	1
hsa-miR-3179-5p	2.51434	2.42594	3.08918	0.173539	-0.175614	0.373674	0.451453	0.439378	0.0880413	1	1	1
hsa-miR-3180	2.98334	2.94796	2.67058	-0.0361582	-0.0175322	-0.0389987	0.87953	0.929896	0.859773	1	1	1
hsa-miR-3180-3p	3.20341	3.09138	3.6044	0.208529	0.0463628	0.135865	0.3164	0.823194	0.55529	1	1	1
hsa-miR-3180-4-3p, hsa-miR-3180-5-3p	0.69436	0.512168	0.709272	-0.0992856	0.377465	-0.428526	0.795124	0.422644	0.390255	1	1	1
hsa-miR-3180-5p	1.2766	1.33913	0.791636	-0.337123	0.103392	-0.434357	0.314238	0.726574	0.201197	1	1	1
hsa-miR-3181	0	0	0	0.723275	-0.0730103	0.783331	0.428145	0.965784	0.41014	1	1	1
hsa-miR-3181-3p	0	0	0	0.624524	0.304969	0.316467	0.559752	0.593182	1	1	1	1
hsa-miR-3182	0	0	0	0.865505	0.900499	-0.0482518	0.209136	0.0923893	0.842346	1	1	1
hsa-miR-3182-3p	4.03274	5.12605	5.40916	0.269104	0.222526	0.0598693	0.329057	0.447415	0.845915	1	1	1
hsa-miR-3183	0	0	0	0.27173	-0.218411	0.489144	0.782551	0.574202	0.397933	1	1	1
hsa-miR-3183-3p	0.945744	1.00981	0	-0.461508	0.705806	-1.1948	0.304084	0.0676683	0.00668286	1	1	1
hsa-miR-3184-3p	0	0	0	0.264978	-0.485215	0.759023	0.807458	0.538694	0.435575	1	1	1
hsa-miR-3184-5p	0.62114	0	0.189117	-0.0608192	-0.196196	0.211025	0.820596	0.643414	0.66659	1	1	1
hsa-miR-3185	0	0	0	0.0818268	0.124886	-0.0480966	1	0.930658	0.942921	1	1	1
hsa-miR-3185-3p	0	0	0	-0.0874154	0.128322	-0.217315	0.855611	0.788005	0.72411	1	1	1
hsa-miR-3186-3p	0	0	0	0.236458	-0.331375	0.675609	0.853442	0.550797	0.372996	1	1	1
hsa-miR-3186-5p	0	0	0	-0.0248295	0.096255	-0.198973	0.931964	0.838806	0.603856	1	1	1
hsa-miR-3187-3p	3.52268	3.2305	3.21196	0.0284189	-0.0200366	0.0297241	0.88494	0.91357	0.877049	1	1	1
hsa-miR-3187-5p	1.04832	1.58784	1.43882	0.226088	0.476123	-0.191563	0.470508	0.109444	0.527678	1	1	1
hsa-miR-3188	0	0	0	-0.181827	-0.473992	0.282225	0.666778	0.458053	1	1	1	1
hsa-miR-3188-5p	4.10829	4.52227	5.37791	0.275141	0.199735	0.0542141	0.256135	0.403631	0.813585	1	1	1
hsa-miR-3189-3p	0	0	0	0.305742	0.0168661	0.315847	0.92936	1	0.900932	1	1	1
hsa-miR-3189-5p	0	0	0	0.177966	0.0962185	0.0950008	1	0.980676	1	1	1	1
hsa-miR-3190-3p	7.32728	7.80516	9.01272	0.22479	-0.0448925	0.289285	0.101565	0.752545	0.0446072	1	1	1
hsa-miR-3190-5p	0	0	0	0.24577	-0.126729	0.412471	1	0.83021	1	1	1	1
hsa-miR-3191-3p	13.8696	13.4123	11.5916	0.0485042	0.14469	-0.107744	0.75227	0.365511	0.49798	1	1	1
hsa-miR-3191-5p	0.806545	0.96861	0.974807	0.472035	0.29218	0.19719	0.195456	0.405064	0.590955	1	1	1
hsa-miR-3192-3p	0	0	0	0.300463	0.338552	-0.00379156	1	0.545215	0.957445	1	1	1
hsa-miR-3192-5p	1.07932	0.522359	1.1369	0.260453	-0.255182	0.571574	0.458974	0.470399	0.129188	1	1	1
hsa-miR-3193	0	0	0	0.30684	0.0104932	0.307655	0.940929	1	0.933394	1	1	1
hsa-miR-3193-3p	0	0	0	-0.00401019	0.748884	0.122093	0.962655	0.362179	1	1	1	1
hsa-miR-3194-3p	0.691592	0.479232	0.677187	-0.506543	-0.941359	0.413099	0.255043	0.0436177	0.273284	1	1	1
hsa-miR-3194-5p	0	0	0	0.179263	0.161741	0.0153692	1	1	1	1	1	1
hsa-miR-3195	2.13934	1.96383	2.21742	0.107525	0.0523812	0.0682528	0.690337	0.859713	0.815596	1	1	1
hsa-miR-3195-3p	0.259778	0	0.622072	-0.0557748	-0.806195	0.780681	0.872308	0.0986271	0.0855512	1	1	1
hsa-miR-3196	0	0	0	0.532537	0.157976	0.376133	0.820945	0.937916	0.851389	1	1	1
hsa-miR-3196-3p	2.88492	2.56069	3.01712	0.0821306	-0.116935	0.166543	0.734632	0.61324	0.500628	1	1	1
hsa-miR-3197	0	0	0	0.243686	-0.287598	0.529661	0.822091	0.817339	0.692673	1	1	1
hsa-miR-3197-3p	0	0	0	0.774936	0.0903234	0.687255	0.553561	0.963664	0.567664	1	1	1
hsa-miR-3198	0	0	0	0.274999	-0.0957539	0.448297	1	0.770748	0.488544	1	1	1
hsa-miR-3198-5p	3.06553	2.19113	2.25682	-0.281283	-0.163067	-0.124432	0.246927	0.44736	0.596629	1	1	1
hsa-miR-3199	0.713998	0	0	-0.37413	-0.599992	0.214587	0.353844	0.13694	0.665558	1	1	1
hsa-miR-3199-3p	0.62114	0.533158	1.0558	0.630233	0.0169935	0.645249	0.107093	0.972705	0.0939104	1	1	1
hsa-miR-32-3p	16.4456	18.1217	14.7612	-0.0277039	0.0717259	-0.0917205	0.846856	0.556126	0.486814	1	1	1
hsa-miR-32-5p	134.258	129.593	130.394	-0.157642	-0.0813495	-0.070755	0.256518	0.53226	0.615162	1	1	1
hsa-miR-3200-3p	0	0	0	0.219097	-0.098259	0.364841	0.659535	0.878552	0.430632	1	1	1
hsa-miR-3200-5p	0	0	0	-0.13672	-0.0109801	-0.135132	0.745747	1	0.701529	1	1	1
hsa-miR-3201	0	0	0	0.387056	0.0901552	0.304221	0.894338	0.944569	1	1	1	1
hsa-miR-3201-3p	0	0	0	0.32437	-0.0521575	0.386588	0.864722	0.973419	0.837098	1	1	1
hsa-miR-3202	0	0	0	0.314141	-0.370066	0.744952	0.619674	0.481181	0.146575	1	1	1
hsa-miR-3202-3p	0	0	0	0.369131	0.586055	-0.148339	0.566143	0.220306	0.698385	1	1	1
hsa-miR-320a-3p	9974.6	9920.56	10286.4	0.0311206	-0.0268423	0.0547841	0.756815	0.759847	0.574867	1	1	1
hsa-miR-320a-5p	0.495448	0	0	-0.515544	-0.783515	0.191492	0.209808	0.0731544	0.862732	1	1	1
hsa-miR-320b	0	0	0	0.223791	0.0917947	0.167678	1	0.895216	1	1	1	1
hsa-miR-320b-1-5p	236.559	209.698	259.594	0.0787663	-0.101713	0.173685	0.477219	0.290141	0.1063	1	1	1
hsa-miR-320b-2-5p	116.347	100.524	108.371	0.030551	-0.107907	0.133348	0.796489	0.278646	0.270931	1	1	1
hsa-miR-320c	0	0	0	-0.143543	-0.989357	1.0246	1	0.289133	0.125311	1	1	1
hsa-miR-320c-1-5p	20.463	18.7899	17.537	-0.00919733	-0.0873208	0.0730947	0.949002	0.455012	0.594765	1	1	1
hsa-miR-320c-2-5p	20.4101	19.3711	20.4154	0.079421	-0.0763296	0.139306	0.580917	0.550979	0.323871	1	1	1
hsa-miR-320d	0	0	0	0.452854	0.0469209	0.346355	0.547647	0.884419	0.702806	1	1	1
hsa-miR-320d-1-5p	18.0162	18.151	19.76	-0.0363506	-0.168737	0.143015	0.828703	0.274544	0.322923	1	1	1
hsa-miR-320d-2-5p	5.55217	4.8844	6.08803	0.205357	-0.0509079	0.263198	0.242805	0.774058	0.129714	1	1	1
hsa-miR-320e	0	0	0	0.681868	-0.563629	1.23694	0.511166	0.473986	0.083677	1	1	1
hsa-miR-320e-5p	12.3549	9.60951	10.4174	-0.0375384	-0.0904485	0.0556551	0.816652	0.516383	0.724843	1	1	1
hsa-miR-323a-3p	159.012	194.698	197.071	0.32977	0.392742	-0.0602841	0.0751721	0.0443475	0.772508	1	1	1
hsa-miR-323a-5p	2.27112	2.92986	3.45734	0.370464	0.37733	0.0465474	0.178468	0.271888	0.886793	1	1	1
hsa-miR-323b-3p	196.706	219.295	248.673	0.231531	0.210023	0.0113396	0.262603	0.32138	0.95571	1	1	1
hsa-miR-323b-5p	0	0	0	0.218514	-0.0362528	0.234828	0.760227	0.927507	0.72778	1	1	1
hsa-miR-324-3p	43.012	37.4895	40.8175	-0.0388606	-0.131991	0.0985426	0.746913	0.300611	0.421673	1	1	1
hsa-miR-324-5p	21.5459	17.1015	21.2823	-0.0742807	-0.228504	0.156553	0.648708	0.183647	0.36383	1	1	1
hsa-miR-325	0	0	0	0.330377	0.258462	0.081103	0.887244	0.754838	1	1	1	1
hsa-miR-325-3p	0	0	0	0.246526	0.307026	-0.057188	1	0.826916	0.933441	1	1	1
hsa-miR-326	0	0	0	0.00669503	-0.623677	0.670392	1	0.173604	0.228748	1	1	1
hsa-miR-326-5p	255.282	221.353	221.97	-0.0983863	-0.214606	0.125896	0.53379	0.182128	0.428757	1	1	1
hsa-miR-328-3p	1101.69	1211.29	1233.61	0.193836	0.161417	0.0279373	0.122965	0.197004	0.824027	1	1	1
hsa-miR-328-5p	0	0	0	-0.524028	-0.540773	0.0860288	0.265914	0.302496	1	1	1	1
hsa-miR-329-3p	5.80839	5.58507	7.51736	0.475299	0.142843	0.330428	0.0428128	0.524241	0.156974	1	1	1
hsa-miR-329-5p	108.452	113.672	132.225	0.200548	0.218825	-0.0214045	0.334321	0.296351	0.918071	1	1	1
hsa-miR-330-3p	889.84	812.433	877.541	0.101136	0.0438606	0.056297	0.334965	0.634459	0.578172	1	1	1
hsa-miR-330-5p	71.4256	74.7008	71.3888	0.0061331	0.0739777	-0.0614917	0.929266	0.236976	0.342389	1	1	1
hsa-miR-331-3p	149.543	150.565	165.05	0.165801	-0.0715643	0.241564	0.0629188	0.444505	0.0135909	1	1	1
hsa-miR-331-5p	36.7368	38.5537	37.6143	0.00806622	0.0209097	-0.0100924	0.924577	0.79768	0.908852	1	1	1
hsa-miR-335-3p	788.314	950.396	800.437	-0.146102	0.16199	-0.306286	0.286776	0.118197	0.0168025	1	1	1
hsa-miR-335-5p	184.463	181.319	168.962	-0.253609	-0.122558	-0.124239	0.0283025	0.256308	0.244807	1	1	1
hsa-miR-337-3p	51.7344	58.3762	58.0656	0.13464	0.224433	-0.0951223	0.508852	0.306416	0.66283	1	1	1
hsa-miR-337-5p	4.14168	5.58507	5.89009	0.255541	0.202745	0.0551069	0.298232	0.395048	0.80485	1	1	1
hsa-miR-338-3p	2.26517	2.71347	2.48811	0.237411	-0.0168268	0.256691	0.339956	0.939852	0.271257	1	1	1
hsa-miR-338-5p	104.971	111.309	117.398	0.161643	0.076006	0.0861157	0.0545798	0.376817	0.264137	1	1	1
hsa-miR-339-3p	192.1	196.071	211.253	0.0951053	0.0817266	0.0212277	0.177765	0.366719	0.80852	1	1	1
hsa-miR-339-5p	729.483	771.479	837.428	0.0829539	-0.0114087	0.0993891	0.436026	0.920047	0.351265	1	1	1
hsa-miR-33a-3p	1.70049	1.39029	1.58754	-0.358649	-0.373482	0.0329315	0.369622	0.33655	0.929398	1	1	1
hsa-miR-33a-5p	5.09127	4.91818	4.58536	-0.189548	-0.00647177	-0.181199	0.320536	0.972074	0.308217	1	1	1
hsa-miR-33b-3p	0	0	0	-0.43029	-0.090722	-0.316654	0.357556	0.802656	0.487568	1	1	1
hsa-miR-33b-5p	0	0	0	0.216381	-0.0530035	0.223608	1	0.967917	1	1	1	1
hsa-miR-340-3p	692.95	784.099	755.447	0.134022	0.137931	-0.00728854	0.176927	0.121684	0.929504	1	1	1
hsa-miR-340-5p	2980.19	2682.75	2680.2	-0.12011	-0.069204	-0.0440607	0.274915	0.520088	0.687124	1	1	1
hsa-miR-342-3p	909.403	797.545	846.735	-0.0784467	-0.173764	0.106827	0.539486	0.235101	0.443981	1	1	1
hsa-miR-342-5p	151.158	142.131	173.912	0.0385922	-0.154241	0.199854	0.808168	0.340499	0.206033	1	1	1
hsa-miR-345-3p	2.28683	2.71412	2.26253	0.0998848	0.201496	-0.092174	0.715969	0.453586	0.761401	1	1	1
hsa-miR-345-5p	107.301	104.465	117.686	0.048369	0.0018265	0.0562076	0.601205	0.98617	0.577467	1	1	1
hsa-miR-346	0	0	0	0.265422	0.182505	0.0942849	0.87374	0.701319	1	1	1	1
hsa-miR-346-3p	0	0	0	0.28246	0.0260128	0.306863	0.818885	1	0.852198	1	1	1
hsa-miR-34a-3p	0	0	0	0.23893	0.0832505	0.167047	1	0.9676	1	1	1	1
hsa-miR-34a-5p	2.47001	3.17294	2.64898	0.307439	0.39507	-0.0503099	0.304865	0.130405	0.861631	1	1	1
hsa-miR-34b-3p	0	0	0	-0.0536791	-0.280599	0.232755	0.893892	0.720526	1	1	1	1
hsa-miR-34b-5p	0	0	0	0.854337	-0.0952473	0.986606	0.20954	0.831457	0.128885	1	1	1
hsa-miR-34c-3p	0	0	0	0.240974	0.0880575	0.158888	1	0.957257	1	1	1	1
hsa-miR-34c-5p	0.175695	0	0	-0.0605181	-0.0170201	0.0383298	0.79932	0.939004	1	1	1	1
hsa-miR-3529-3p	0	0	0	0.10258	0.0211358	0.0913597	1	0.98216	1	1	1	1
hsa-miR-3529-5p	0	0	0	0.32931	-0.29287	0.592782	0.809445	0.718799	0.617201	1	1	1
hsa-miR-3605-3p	7.75425	7.6103	8.70341	0.283245	0.19793	0.0869506	0.13344	0.313488	0.685091	1	1	1
hsa-miR-3605-5p	8.66601	7.70413	8.9333	0.122117	-0.0733307	0.161517	0.429649	0.620036	0.275961	1	1	1
hsa-miR-3606-3p	0	0	0	0.393155	NA	0.379965	0.928849	NA	0.921046	1	NA	1
hsa-miR-3606-5p	0	0	0	0.324217	0.154554	0.159892	1	0.905453	1	1	1	1
hsa-miR-3609	0	0	0	0.0317565	-0.185309	0.246255	1	0.807933	1	1	1	1
hsa-miR-3609-5p	1.07492	1.04739	1.43363	0.304844	-0.243245	0.53043	0.54926	0.577343	0.26047	1	1	1
hsa-miR-361-3p	1803.56	1720.38	1807.52	-0.0202057	-0.0239025	0.0068735	0.774036	0.711431	0.915687	1	1	1
hsa-miR-361-5p	313.483	296.513	306.68	-0.0455659	-0.0876987	0.0462635	0.650547	0.373542	0.607185	1	1	1
hsa-miR-3610	0	0	0	0.666901	0.0217324	0.641293	0.64329	1	0.562313	1	1	1
hsa-miR-3610-5p	0	0	0	0.216818	-0.0883909	0.326453	1	0.880127	0.935338	1	1	1
hsa-miR-3611	0	0	0	0.462193	0.239306	0.236302	0.867522	0.897502	1	1	1	1
hsa-miR-3611-5p	0.175695	0	0	-0.194113	-0.116532	0.0320141	0.561279	0.779566	1	1	1	1
hsa-miR-3612	0	0	0	1.15156	0.834304	0.419051	0.0426117	0.138014	0.462181	1	1	1
hsa-miR-3612-3p	0	0	0	0.27702	0.461194	-0.127288	0.715437	0.277901	0.692732	1	1	1
hsa-miR-3613-3p	8.77974	6.90793	7.61846	-0.047952	-0.0409508	-0.00301683	0.812476	0.839834	0.988416	1	1	1
hsa-miR-3613-5p	158.88	148.127	138.61	-0.156588	-0.124465	-0.0160197	0.334925	0.421397	0.916417	1	1	1
hsa-miR-3614-3p	3.6612	2.60334	3.265	-0.0358263	-0.231817	0.214052	0.897363	0.369494	0.387953	1	1	1
hsa-miR-3614-5p	1.01171	1.0073	0.936935	-0.022972	-0.0282625	0.038094	0.955765	0.935472	0.915944	1	1	1
hsa-miR-3615	0	0	0.394538	0.758756	-0.266047	1.11044	0.167752	0.643171	0.0319428	1	1	1
hsa-miR-3615-5p	425.154	453.238	478.779	0.222267	0.0894618	0.12555	0.117783	0.503272	0.317747	1	1	1
hsa-miR-3616-3p	0	0	0	0.15464	0.0832783	0.0860525	1	0.914397	1	1	1	1
hsa-miR-3616-5p	0	0	0	0.376275	0.0138351	0.376669	0.960642	1	0.916559	1	1	1
hsa-miR-3617-3p	0.760655	1.07504	1.07783	0.270474	0.165109	0.164539	0.50587	0.652287	0.658161	1	1	1
hsa-miR-3617-5p	8.53837	9.42607	9.43076	0.0400973	0.0714448	0.017114	0.843152	0.73198	0.93026	1	1	1
hsa-miR-3618	0	0	0	0.0920037	0.0238776	0.13323	1	1	1	1	1	1
hsa-miR-3618-5p	0	0	0	0.546608	0.169197	0.378136	0.812156	0.902072	0.935017	1	1	1
hsa-miR-3619-3p	0	0	0	0.00660453	0.00949248	0.015985	1	1	1	1	1	1
hsa-miR-3619-5p	0	0	0	0.185821	-0.19075	0.382633	1	0.877734	0.875994	1	1	1
hsa-miR-362-3p	0	0	0	-0.156135	-0.199776	0.0537202	0.79134	0.793451	1	1	1	1
hsa-miR-362-5p	22.6013	22.4083	27.1173	0.0940765	-0.0324142	0.123122	0.436637	0.783234	0.280489	1	1	1
hsa-miR-3620-5p	4.86331	4.81604	3.97921	-0.287385	-0.00512694	-0.29635	0.153969	0.975762	0.116686	1	1	1
hsa-miR-3621	0	0	0	-0.260405	-0.628501	0.386838	0.614326	0.425176	0.901684	1	1	1
hsa-miR-3621-3p	0	0	0	0.607612	0.773124	-0.0836066	0.322376	0.0969594	0.787313	1	1	1
hsa-miR-3622a-3p	0	0	0	0.426973	0.0941139	0.327812	0.739296	0.922659	0.784066	1	1	1
hsa-miR-3622a-5p	0	0	0	0.528915	0.13202	0.360109	0.833358	0.914364	0.968944	1	1	1
hsa-miR-3622b-3p	0	0	0	0.361356	0.0226107	0.347309	0.896122	0.964792	0.963034	1	1	1
hsa-miR-3622b-5p	0	0	0	0.433929	0.0119701	0.457587	0.801092	0.972381	0.802486	1	1	1
hsa-miR-363-3p	1133.83	1096.44	1126.25	-0.00977531	-0.0337405	0.0280877	0.89401	0.585913	0.700435	1	1	1
hsa-miR-363-5p	4.94125	4.41861	4.02822	-0.247141	-0.182481	-0.0735131	0.160693	0.286116	0.683799	1	1	1
hsa-miR-3646	0	0	0	0.619785	0.0777454	0.581017	0.429383	0.908524	0.392859	1	1	1
hsa-miR-3646-5p	0	0	0	0.172187	-0.127026	0.307792	1	0.911537	0.904076	1	1	1
hsa-miR-3648	1.01908	1.22085	1.22529	0.326643	0.636292	-0.292671	0.294077	0.0596556	0.367479	1	1	1
hsa-miR-3648-3p	3.44527	3.5148	3.57224	0.056347	-0.0886967	0.168214	0.772511	0.632753	0.370821	1	1	1
hsa-miR-3649	0	0	0	-0.251592	-0.377206	0.129004	0.562136	0.432293	1	1	1	1
hsa-miR-3649-5p	0	0	0	0.0151323	0.138146	-0.119589	1	0.847303	0.791535	1	1	1
hsa-miR-3650	0	0	0	0.0933959	0.0136959	0.0919029	1	1	1	1	1	1
hsa-miR-3650-3p	0	0	0	-0.132641	0.111532	-0.248666	0.754469	0.820667	0.536562	1	1	1
hsa-miR-3651	0	0	0	0.398718	0.56869	-0.163509	1	0.552175	0.73645	1	1	1
hsa-miR-3651-5p	0	0	0	-0.0253439	-0.0548388	0.0156362	0.940114	1	1	1	1	1
hsa-miR-3652	0	0	0	0.180315	0.0448962	0.239162	1	0.933805	1	1	1	1
hsa-miR-3652-3p	0.874721	0	0.189117	-0.5321	-0.648975	0.107831	0.151515	0.100742	0.880173	1	1	1
hsa-miR-3654	0	0	0	0.654904	0.0526137	0.629953	0.370643	1	0.384861	1	1	1
hsa-miR-3654-5p	0	0	0	0.0391298	-0.201585	0.232047	1	0.858131	1	1	1	1
hsa-miR-3655	0	0	0	0.35812	0.0167689	0.367344	0.869869	1	0.839887	1	1	1
hsa-miR-3655-3p	0	0	0	0.327302	0.00535549	0.364652	0.794872	1	0.748566	1	1	1
hsa-miR-3657	0	0	0	0.20396	0.431601	-0.281949	0.955393	0.47853	0.609418	1	1	1
hsa-miR-3657-5p	0	0	0	0.346548	0.260401	0.0433285	0.92582	0.850474	1	1	1	1
hsa-miR-3658	0	0	0	0.473183	0.0971668	0.375899	0.855993	0.943769	0.928317	1	1	1
hsa-miR-3658-3p	0	0	0	0.301807	-0.261407	0.539015	0.621615	0.638797	0.420579	1	1	1
hsa-miR-3659	0	0	0	0.838765	1.03309	-0.232163	0.329004	0.0748498	0.593302	1	1	1
hsa-miR-3659-5p	0	0	0	0.483287	0.242843	0.269238	0.682846	0.794088	0.777028	1	1	1
hsa-miR-365a-3p, hsa-miR-365b-3p	3.23581	3.1276	3.72364	0.0362619	-0.128171	0.187959	0.902129	0.691186	0.589667	1	1	1
hsa-miR-365a-5p	0.236581	0	0	-0.0606201	-0.817672	0.806489	0.880918	0.140055	0.125314	1	1	1
hsa-miR-365b-5p	0	0	0	-0.351156	-0.19795	-0.10738	0.409907	1	0.6898	1	1	1
hsa-miR-3660	0	0	0	0.0892391	-0.548383	0.603444	1	0.310617	0.439326	1	1	1
hsa-miR-3660-5p	0	0	0	0.115398	0.120426	-0.0270642	1	0.914272	0.914715	1	1	1
hsa-miR-3661	0	0	0.310511	-0.383825	-2.17168	1.47165	0.584491	0.112134	0.0303193	1	1	1
hsa-miR-3661-3p	1.00222	1.31493	0.715156	-0.147669	0.132248	-0.30603	0.707792	0.685549	0.363963	1	1	1
hsa-miR-3662	0	0	0	0.0125184	0.922858	-0.919093	1	0.103341	0.0893883	1	1	1
hsa-miR-3662-5p	0	0	0	1.01107	-0.062031	1.14932	0.472146	0.923406	0.401338	1	1	1
hsa-miR-3663-3p	0	0	0	0.15605	-0.423809	0.583659	1	0.407433	0.27985	1	1	1
hsa-miR-3663-5p	0	0	0	0.803016	-0.181157	0.934714	0.238776	0.800305	0.258433	1	1	1
hsa-miR-3664-3p	0	0	0	0.168312	-0.198019	0.376549	1	0.883381	0.905189	1	1	1
hsa-miR-3664-5p	0	0	0	0.842978	0.163304	0.682849	0.542935	0.928677	0.588797	1	1	1
hsa-miR-3665	0	0	0	0.216585	0.177942	0.076072	0.854987	0.726388	1	1	1	1
hsa-miR-3665-3p	5.97444	6.17834	5.45041	0.113292	0.193793	-0.084969	0.487893	0.245692	0.629315	1	1	1
hsa-miR-3666	0	0	0	0.429372	0.392873	0.0779702	0.779106	0.562801	1	1	1	1
hsa-miR-3666-3p	0	0	0	-0.0130434	0.0660174	-0.0211467	0.945076	0.902489	0.914521	1	1	1
hsa-miR-3667-3p	0	0	0	0.113939	-0.285839	0.450006	0.822295	0.540441	0.335057	1	1	1
hsa-miR-3667-5p	0	0	0	-0.216337	0.556361	-0.730251	0.576218	0.234258	0.141229	1	1	1
hsa-miR-3668	0	0	0	-0.22287	-0.816595	0.442045	0.752995	0.604671	0.764473	1	1	1
hsa-miR-3668-3p	0	0	0	0.88726	-0.131938	0.98615	0.122074	0.805193	0.0875421	1	1	1
hsa-miR-367-3p	0	0	0	0.0392067	-0.140195	0.160782	1	0.870927	1	1	1	1
hsa-miR-367-5p	0	0	0	0.315206	-0.0542952	0.376376	1	0.953656	0.898927	1	1	1
hsa-miR-3670	0	0	0	0.326059	0.165879	0.165682	0.893619	0.922563	0.963858	1	1	1
hsa-miR-3670-5p	0	0	0	0.730182	0.529636	0.212415	0.37115	0.551453	0.777696	1	1	1
hsa-miR-3671	0	0	0	0.351534	-0.125909	0.471391	1	0.939432	0.920007	1	1	1
hsa-miR-3671-5p	0	0	0	0.516084	NA	0.511838	0.841863	NA	0.847527	1	NA	1
hsa-miR-3672	0	0	0	0.326157	0.0927085	0.239488	0.949081	0.963828	1	1	1	1
hsa-miR-3672-3p	0	0	0	0.0296921	-0.130029	0.158888	1	0.869482	1	1	1	1
hsa-miR-3674	0	0	0	0.240802	0.0886291	0.158291	1	0.936589	1	1	1	1
hsa-miR-3674-3p	0	0	0	0.238833	0.0121044	0.238475	1	0.977671	1	1	1	1
hsa-miR-3675-3p	1.00989	0.847739	0.85691	-0.0139991	0.491342	-0.460395	0.949389	0.310326	0.302998	1	1	1
hsa-miR-3675-5p	2.07613	3.02411	3.44865	0.526779	0.632728	-0.0933482	0.192029	0.116388	0.816019	1	1	1
hsa-miR-3677-3p	0	0	0	-0.586769	0.572011	-1.18852	0.119908	0.219056	0.010371	1	1	1
hsa-miR-3677-5p	0	0	0	0.55871	-0.0662195	0.608848	0.373318	1	0.436563	1	1	1
hsa-miR-3678-3p	0	0	0	0.519836	0.297643	0.167327	0.45291	0.581029	0.778197	1	1	1
hsa-miR-3678-5p	1.54463	1.76377	1.4752	-0.0398228	0.0974595	-0.202595	0.898813	0.736113	0.457985	1	1	1
hsa-miR-3679-3p	0	0	0	0.26825	0.225284	0.0647997	0.821191	0.675005	1	1	1	1
hsa-miR-3679-5p	12.5916	11.8792	12.4999	-0.0375417	-0.0580614	0.00387252	0.750859	0.586	0.973865	1	1	1
hsa-miR-3680-3p	0	0	0	0.127736	0.132051	0.0200599	1	0.88981	1	1	1	1
hsa-miR-3680-5p	0	0	0	0.832213	0.507233	0.30682	0.161148	0.296527	0.728592	1	1	1
hsa-miR-3681-3p	0	0	0	0.242244	-0.057637	NA	1	0.968018	NA	1	1	NA
hsa-miR-3681-5p	0	0	0	0.292841	0.0170347	0.31548	1	1	1	1	1	1
hsa-miR-3682-3p	0.999619	0.816198	0.684025	-0.213564	0.113544	-0.349666	0.567535	0.742314	0.319119	1	1	1
hsa-miR-3682-5p	0	0	0	0.470208	NA	0.457458	0.829284	NA	0.840668	1	NA	1
hsa-miR-3683	0	0	0	0.133024	-0.341192	0.499126	1	0.626412	0.800512	1	1	1
hsa-miR-3683-3p	0	0	0	0.462833	0.349834	0.15698	0.563833	0.583322	0.926053	1	1	1
hsa-miR-3684	0	0	0	0.0974333	-0.297996	0.450653	1	0.853178	0.894143	1	1	1
hsa-miR-3684-5p	0.642732	0	0.304014	-0.328458	-0.57491	0.272656	0.418691	0.171862	0.546724	1	1	1
hsa-miR-3685	0	0	0	0.23074	0.0855558	0.169273	1	0.958375	1	1	1	1
hsa-miR-3685-3p	0.624559	0	0.189117	-0.88445	-0.519304	-0.335789	0.118189	0.444775	0.548889	1	1	1
hsa-miR-3686	0	0	0	0.104259	-0.226737	0.297855	1	0.796673	1	1	1	1
hsa-miR-3686-5p	0	0	0	0.270454	-0.265866	0.520053	0.91673	0.820458	0.74122	1	1	1
hsa-miR-3688-3p	1.42322	1.49836	0.94411	-0.382686	0.0560874	-0.378664	0.252133	0.836008	0.190159	1	1	1
hsa-miR-3688-5p	1.2081	1.31905	1.46609	0.236125	0.0914015	0.158289	0.423478	0.757121	0.566115	1	1	1
hsa-miR-3689a-3p	0	0	0	0.319369	-0.133958	0.453678	0.962311	0.923734	0.85623	1	1	1
hsa-miR-3689a-5p, hsa-miR-3689b-5p, hsa-miR-3689e	0	0	0	0.819976	-0.214123	0.975629	0.525164	0.887392	0.428425	1	1	1
hsa-miR-3689b-3p, hsa-miR-3689c	0	0	0	0.0226099	-0.546747	0.551628	1	0.504057	0.691096	1	1	1
hsa-miR-3689c-5p	0	0	0	0.0900042	-0.0589189	0.156612	1	0.934049	1	1	1	1
hsa-miR-3689d	0	0	0	0.0990157	-0.272417	0.377286	1	0.776994	0.808471	1	1	1
hsa-miR-3689d-3p	0	0	0	0.347038	-0.113417	0.451967	0.705555	0.94735	0.688226	1	1	1
hsa-miR-3689e-3p	0	0	0	0.241497	-0.13435	0.378767	1	0.900028	0.901182	1	1	1
hsa-miR-3689f	0	0	0	0.179512	-0.127195	NA	1	0.944276	NA	1	1	NA
hsa-miR-3689f-3p	0	0	0	0.408353	0.230915	0.150059	0.730698	0.723145	1	1	1	1
hsa-miR-369-3p	179.359	160.64	143.368	-0.0617563	0.00894047	-0.0781412	0.835447	0.974458	0.795901	1	1	1
hsa-miR-369-5p	96.5486	95.8169	108.4	0.060894	0.140072	-0.0736587	0.758783	0.494811	0.707302	1	1	1
hsa-miR-3690	0	0	0	0.467647	0.017903	0.454054	0.866824	0.97205	1	1	1	1
hsa-miR-3690-3p	1.22992	1.36377	0.991733	-0.159893	0.207945	-0.181825	0.711637	0.629362	0.675871	1	1	1
hsa-miR-3691-3p	0	0	0	-0.288715	-0.63871	0.401456	0.562165	0.311294	0.801082	1	1	1
hsa-miR-3691-5p	2.52086	2.31179	2.53382	0.131133	0.0282411	0.10892	0.578886	0.895249	0.636749	1	1	1
hsa-miR-3692-3p	0	0	0	0.0187252	-0.522561	0.526174	1	0.373462	0.570011	1	1	1
hsa-miR-3692-5p	0	0	0	1.20717	0.166937	1.02793	0.0546529	0.940295	0.0748424	1	1	1
hsa-miR-370-3p	3238.92	4134.91	3674.07	0.240678	0.321509	-0.0800843	0.229123	0.128407	0.701185	1	1	1
hsa-miR-370-5p	5.54353	7.57851	6.51946	0.263339	0.632011	-0.356772	0.187028	0.00477971	0.112214	1	1	1
hsa-miR-3713	0	0	0	0.246322	0.0861128	0.157134	1	0.95477	1	1	1	1
hsa-miR-3713-3p	0	0	0	0.391539	0.0971674	0.321693	0.927372	0.930223	1	1	1	1
hsa-miR-3714	0	0	0	0.0904456	-0.0414929	0.16901	1	0.974021	1	1	1	1
hsa-miR-3714-3p	0	0	0	0.208212	0.458348	-0.210928	1	0.399305	0.580067	1	1	1
hsa-miR-371a-5p	0	0	0	0.329326	0.0944721	0.237395	1	0.965125	1	1	1	1
hsa-miR-371b-3p	0	0	0	0.27054	-0.12201	0.391117	0.964734	0.932771	0.894174	1	1	1
hsa-miR-371b-5p	0	0	0	0.158635	0.171443	0.037738	0.896371	0.674564	1	1	1	1
hsa-miR-372-3p	0	0	0	0.23208	-0.32258	0.544852	1	0.791182	0.759811	1	1	1
hsa-miR-372-5p	0	0	0	0.892302	-0.0447642	0.953413	0.202455	0.957409	0.204383	1	1	1
hsa-miR-373-3p	0	0	0	0.432408	0.235389	0.221552	0.789256	0.768044	1	1	1	1
hsa-miR-373-5p	0	0	0	0.387709	-0.053893	0.408339	0.716566	0.919602	0.684026	1	1	1
hsa-miR-374a-3p	117.148	115.508	93.2806	-0.276342	-0.0620364	-0.211377	0.0494607	0.644938	0.137301	1	1	1
hsa-miR-374a-5p	433.387	393.199	392.03	-0.170964	-0.0984564	-0.0643221	0.168547	0.413127	0.607379	1	1	1
hsa-miR-374b-3p	26.0892	25.2903	23.7672	-0.178281	-0.147318	-0.03045	0.286864	0.343379	0.852338	1	1	1
hsa-miR-374b-5p	1816.08	1505.32	1798.54	-0.137342	-0.156016	0.0247282	0.425006	0.347464	0.88829	1	1	1
hsa-miR-374c-3p	0	0	0	0.327355	-0.127245	0.448346	0.808522	0.903536	0.74414	1	1	1
hsa-miR-374c-5p	1.89356	0.964531	0.684025	-0.368961	-0.234294	-0.20025	0.356597	0.518263	0.607429	1	1	1
hsa-miR-375-3p	19.7715	23.5073	23.7681	1.41976	0.524537	0.840957	4.35077e-05	0.0149917	0.0248554	0.137579	1	1
hsa-miR-375-5p	1.31997	1.03369	1.07065	-0.237689	-0.262372	0.0600427	0.448443	0.375619	0.855243	1	1	1
hsa-miR-376a-2-5p	0	0	0	0.315325	-0.339572	0.666336	0.625082	0.571786	0.310031	1	1	1
hsa-miR-376a-3p	1.11026	1.74423	1.77054	0.527627	0.3287	0.189896	0.13833	0.308728	0.585585	1	1	1
hsa-miR-376a-5p	6.61734	6.31697	7.51736	0.122781	-0.0316992	0.131956	0.649803	0.900807	0.603136	1	1	1
hsa-miR-376b-3p	0	0.505332	0	0.637821	0.793902	-0.156692	0.277685	0.11372	0.668959	1	1	1
hsa-miR-376b-5p	0	0	0	0.428211	0.286205	0.131683	0.592615	0.574402	0.917189	1	1	1
hsa-miR-376c-3p	14.236	15.7682	15.0668	-0.096309	-0.0778086	-0.0207804	0.711607	0.757356	0.935667	1	1	1
hsa-miR-376c-5p	0.296121	0.730773	0	0.274598	0.336541	-0.0321758	0.586412	0.43179	0.914671	1	1	1
hsa-miR-377-3p	5.67023	5.67187	5.69931	-0.0306353	-0.148031	0.115842	0.909908	0.569454	0.63229	1	1	1
hsa-miR-377-5p	9.35336	10.0533	9.07447	-0.0742009	0.0316037	-0.0882229	0.7465	0.889385	0.721778	1	1	1
hsa-miR-378a-3p	1181.91	1168.15	1186.74	-0.0258127	-0.0726105	0.055919	0.763594	0.386786	0.421738	1	1	1
hsa-miR-378a-5p	6.70347	7.97922	6.9776	0.10385	0.187123	-0.0593021	0.537524	0.300481	0.742549	1	1	1
hsa-miR-378b	0	0	0	0.380238	0.306501	0.0370559	0.608253	0.616116	1	1	1	1
hsa-miR-378b-5p	0	0	0	-0.239268	-0.0810675	-0.196819	0.498296	0.863616	0.53442	1	1	1
hsa-miR-378c	0.197736	0.733225	0	0.18584	0.409239	-0.269863	0.734572	0.309016	0.493797	1	1	1
hsa-miR-378c-3p	20.3964	17.8132	21.5786	-0.0342634	-0.154857	0.138267	0.832576	0.324022	0.354591	1	1	1
hsa-miR-378d	0	0.423978	0	0.109645	0.0575432	0.0813043	1	1	0.963145	1	1	1
hsa-miR-378d-1	6.1143	4.93613	6.47292	-0.00821378	-0.199671	0.225017	0.963494	0.260803	0.257371	1	1	1
hsa-miR-378d-2-3p	16.9122	16.8001	16.3058	0.00661976	0.0594766	-0.0408503	0.956028	0.596881	0.741564	1	1	1
hsa-miR-378e	0	0	0	0.115382	-0.0858487	0.230885	1	0.886606	1	1	1	1
hsa-miR-378e-5p	1.24349	1.04185	1.147	-0.0210568	-0.475387	0.440822	0.93971	0.114487	0.167759	1	1	1
hsa-miR-378f	0	0	0	-0.0449966	0.504065	-0.492358	0.922986	0.676216	0.667944	1	1	1
hsa-miR-378f-5p	3.96738	4.24559	4.00562	-0.0971481	0.198708	-0.255611	0.623916	0.25593	0.127485	1	1	1
hsa-miR-378g	0	0	0	0.217295	-0.10998	0.361847	0.763782	0.868867	0.656173	1	1	1
hsa-miR-378g-3p	4.10411	3.89647	4.09336	-0.0472699	-0.0745694	0.0511926	0.809615	0.68103	0.775605	1	1	1
hsa-miR-378h	0	0	0	0.0988517	0.0122584	0.0839511	1	0.965928	1	1	1	1
hsa-miR-378h-3p	1.08257	1.33256	1.18837	0.0927625	0.326813	-0.221992	0.775093	0.286444	0.461113	1	1	1
hsa-miR-378i	0	0	0	0.604705	0.234545	0.394372	0.712736	0.892696	0.758991	1	1	1
hsa-miR-378i-3p	41.6224	39.3331	41.736	-0.0380223	-0.117901	0.0821652	0.723328	0.27369	0.443562	1	1	1
hsa-miR-378j	0	0	0	0.710312	-0.00733496	0.774687	0.396524	0.982062	0.372774	1	1	1
hsa-miR-378j-3p	1.01582	0.855594	1.15987	0.582416	-0.172848	0.769667	0.312031	0.756526	0.212799	1	1	1
hsa-miR-379-3p	78.9458	85.9714	89.2487	0.188097	0.175467	0.00932931	0.340996	0.381201	0.963499	1	1	1
hsa-miR-379-5p	2095.21	2372.34	2213.99	0.12438	0.269854	-0.147652	0.535841	0.19314	0.485888	1	1	1
hsa-miR-380-3p	1.87552	1.54144	2.17315	0.0644886	-0.186222	0.250614	0.855073	0.594064	0.417807	1	1	1
hsa-miR-380-5p	8.88067	10.4357	10.8809	0.372715	0.409136	-0.0497024	0.108789	0.114772	0.834743	1	1	1
hsa-miR-381-3p	1791.48	1856.8	1805.93	0.139874	0.223266	-0.078166	0.499983	0.298734	0.717461	1	1	1
hsa-miR-381-5p	0	0	0	0.574976	0.0634429	0.538467	0.402145	0.906331	0.434952	1	1	1
hsa-miR-382-3p	99.0603	104.572	99.012	-0.0644104	-0.032672	-0.0464382	0.779274	0.877446	0.835714	1	1	1
hsa-miR-382-5p	972.239	1051.86	1075.54	0.0497952	0.101981	-0.0573447	0.800005	0.602125	0.769286	1	1	1
hsa-miR-383-3p	0	0	0	0.0972973	-0.129331	0.235534	1	0.914659	1	1	1	1
hsa-miR-383-5p	0	0	0	-0.0750308	-0.187662	0.171009	0.838873	0.771925	1	1	1	1
hsa-miR-384	0	0	0	-0.000778569	0.0922337	-0.11169	0.980353	0.891773	0.755243	1	1	1
hsa-miR-384-5p	0	0	0	0.636681	0.262372	0.316601	0.631802	0.845915	0.794713	1	1	1
hsa-miR-3907	0	0	0	0.285576	0.605438	-0.187245	0.78789	0.291503	0.742969	1	1	1
hsa-miR-3907-5p	1.37742	1.09412	1.05733	-0.12751	-0.288645	0.152377	0.688225	0.340153	0.642574	1	1	1
hsa-miR-3908	1.36087	1.50012	1.41286	0.182025	-0.0605092	0.173268	0.576821	0.855366	0.572308	1	1	1
hsa-miR-3908-3p	0.495448	0.448973	0	-0.411677	-0.25009	-0.122842	0.353422	0.537331	0.749775	1	1	1
hsa-miR-3909	0.738441	0	0.968463	0.512385	-0.527568	1.11323	0.155445	0.193212	0.00556923	1	1	1
hsa-miR-3909-5p	5.65732	6.47938	5.47605	-0.0277785	0.00657146	-0.054723	0.889414	0.971874	0.759585	1	1	1
hsa-miR-3910	0	0	0	0.234163	-0.135853	0.368009	1	0.828334	0.850746	1	1	1
hsa-miR-3910-5p	0	0	0	0.316115	0.155724	0.161494	0.883952	0.901299	1	1	1	1
hsa-miR-3911	0	0.479232	0	0.563639	0.226206	0.31636	0.261059	0.622159	0.531018	1	1	1
hsa-miR-3911-3p	3.67878	2.87628	3.19471	0.260519	0.115347	0.165795	0.378446	0.691595	0.618985	1	1	1
hsa-miR-3912-3p	3.06565	3.0774	2.12901	-0.162587	-0.00422673	-0.14224	0.47139	0.983271	0.524546	1	1	1
hsa-miR-3912-5p	0	0	0	0.111463	-0.0563956	0.148188	1	0.960068	1	1	1	1
hsa-miR-3913-3p	7.45664	8.5895	6.57884	-0.0660636	0.125562	-0.173784	0.666051	0.33972	0.196142	1	1	1
hsa-miR-3913-5p	6.37933	6.90218	6.3386	0.0100969	0.157696	-0.149174	0.953313	0.304155	0.313986	1	1	1
hsa-miR-3914	0	0	0	-0.155362	-0.252509	0.0850674	0.740843	0.793732	1	1	1	1
hsa-miR-3914-5p	0	0	0	0.39641	0.0119785	0.350607	0.858689	1	0.84692	1	1	1
hsa-miR-3915	0	0	0	0.225851	-0.126468	0.369214	1	0.937817	0.95226	1	1	1
hsa-miR-3915-3p	0	0	0	-0.00252471	0.822487	-0.768849	0.954077	0.191432	0.149489	1	1	1
hsa-miR-3916	0	0	0	0.261027	-0.0015694	0.297989	1	1	1	1	1	1
hsa-miR-3916-3p	0.555899	0.537592	0	-0.154758	0.0133413	-0.236783	0.64467	0.981029	0.495346	1	1	1
hsa-miR-3917	4.00887	4.58082	3.43902	-0.0256914	0.211402	-0.223975	0.904316	0.381684	0.333581	1	1	1
hsa-miR-3917-5p	0	0	0	-0.037279	0.300254	-0.351702	0.851414	0.513528	0.393472	1	1	1
hsa-miR-3918	0	0	0	0.321698	0.339982	0.105319	1	0.907887	1	1	1	1
hsa-miR-3918-3p	0	0	0	0.56926	0.260511	0.305627	0.392702	0.736151	0.665366	1	1	1
hsa-miR-3919	0	0	0	0.141988	-0.125379	0.317523	1	0.891387	0.795947	1	1	1
hsa-miR-3919-5p	0	0	0	0.328479	-0.195974	0.521621	1	0.885635	0.818568	1	1	1
hsa-miR-3920	0.258867	0	0.639012	-0.0342024	-0.143792	0.00488677	0.902728	0.701749	1	1	1	1
hsa-miR-3920-5p	3.7715	3.92108	3.26764	-0.389893	-0.36189	-0.0365084	0.105413	0.126574	0.859666	1	1	1
hsa-miR-3921	0	0	0	0.308046	-0.193548	0.518216	1	0.818818	0.816475	1	1	1
hsa-miR-3921-5p	0	0	0	0.331456	0.0996849	0.252283	0.94302	1	0.885775	1	1	1
hsa-miR-3922-3p	4.94339	4.22091	4.27608	-0.2705	-0.154305	-0.1091	0.161919	0.441241	0.572174	1	1	1
hsa-miR-3922-5p	0	0	0	0.324216	0.240849	0.105534	0.898941	0.911024	1	1	1	1
hsa-miR-3923	0	0	0	0.803342	0.181412	0.626476	0.362962	0.850588	0.406291	1	1	1
hsa-miR-3923-5p	0	0	0	0.934413	0.381679	0.55766	0.481983	0.784194	0.707938	1	1	1
hsa-miR-3924	0	0	0	0.461716	0.0866722	0.390649	0.84461	0.971136	0.843295	1	1	1
hsa-miR-3924-5p	0	0	0	0.530326	0.190258	0.364612	0.453304	0.742597	0.730906	1	1	1
hsa-miR-3925-3p	0	0	0	0.391385	NA	0.379793	0.919171	NA	0.916975	1	NA	1
hsa-miR-3925-5p	1.00621	0.633008	0.901911	-0.0813154	0.501179	-0.532232	0.796416	0.200261	0.218931	1	1	1
hsa-miR-3926	0	0	0	0.311611	0.0908826	0.232029	1	0.94712	1	1	1	1
hsa-miR-3926-3p	0	0	0	0.54921	0.237638	0.315707	0.739618	0.867633	0.884187	1	1	1
hsa-miR-3927-3p	0	0	0	0.388012	0.0895181	0.337986	0.786833	1	0.797192	1	1	1
hsa-miR-3927-5p	0	0	0	NA	0.0935772	0.240146	NA	0.964196	1	NA	1	1
hsa-miR-3928-3p	15.0801	13.2911	13.7561	-0.116043	-0.20263	0.0980404	0.30094	0.0736144	0.395042	1	1	1
hsa-miR-3928-5p	0	0	0	0.258137	-0.256751	0.516422	1	0.78238	0.816249	1	1	1
hsa-miR-3929	6.1143	6.5989	5.0999	-0.137265	-0.0371494	-0.103632	0.37753	0.788103	0.496505	1	1	1
hsa-miR-3929-5p	0	0	0	0.351148	0.329293	0.0278381	0.921199	0.763804	1	1	1	1
hsa-miR-3934-3p	0	0	0	0.0902364	-0.590433	0.657102	1	0.425946	0.481299	1	1	1
hsa-miR-3934-5p	0.663402	1.31493	1.54494	-0.00121586	0.0186608	0.150299	0.991946	0.967256	0.650031	1	1	1
hsa-miR-3935	0	0	0	0.173496	0.452582	-0.209244	0.968049	0.543067	0.79323	1	1	1
hsa-miR-3935-5p	0	0	0	0.146373	-0.188484	0.331237	1	0.894755	1	1	1	1
hsa-miR-3936	0	0	0	0.836288	0.399015	0.351939	0.3377	0.490019	0.688083	1	1	1
hsa-miR-3936-5p	0	0	0	0.312693	0.0689732	0.196065	1	0.925853	1	1	1	1
hsa-miR-3937	0	0	0	0.236002	-0.113034	0.347264	1	0.883409	0.856185	1	1	1
hsa-miR-3937-5p	1.17533	1.03369	0.44434	-0.484232	-0.446612	-0.0340346	0.320517	0.315041	0.94208	1	1	1
hsa-miR-3938	0	0	0	0.0233067	-0.109589	0.118245	1	0.858597	1	1	1	1
hsa-miR-3938-5p	0	0	0	-0.174233	-0.143552	-0.0527659	0.620022	0.753988	0.820811	1	1	1
hsa-miR-3939	0.645584	1.08869	0.834507	0.296626	0.380551	-0.0970732	0.422005	0.273239	0.786799	1	1	1
hsa-miR-3939-5p	1.76629	1.61389	1.08597	-0.159451	0.0712686	-0.161178	0.581558	0.778204	0.593123	1	1	1
hsa-miR-3940-3p	1.76847	1.52302	1.98284	-0.118303	-0.243172	0.0938496	0.659258	0.364401	0.720539	1	1	1
hsa-miR-3940-5p	0	0	0	0.102322	-0.34949	0.473088	1	0.422729	0.541676	1	1	1
hsa-miR-3941	6.51608	6.67654	6.17545	0.0459596	0.097225	-0.0316319	0.875081	0.74309	0.915393	1	1	1
hsa-miR-3941-5p	0	0	0	0.426595	-0.292817	0.770229	0.376092	0.588584	0.123195	1	1	1
hsa-miR-3942-3p	0	0	0	0.215709	-0.24792	0.498362	1	0.6315	0.573927	1	1	1
hsa-miR-3942-5p	0.62114	0.598035	0.878403	0.704599	0.176503	0.510523	0.0728984	0.641539	0.19144	1	1	1
hsa-miR-3943	2.02373	2.02126	2.78365	-0.267171	-0.0585529	-0.194142	0.546248	0.897885	0.651164	1	1	1
hsa-miR-3943-3p	0	0	0	0.541969	0.163499	0.368299	0.596431	0.841501	0.712699	1	1	1
hsa-miR-3944-3p	0	0	0	0.785091	0.1584	0.639621	0.450005	0.897527	0.468187	1	1	1
hsa-miR-3944-5p	0	0	0	-0.264125	-0.279391	0.0395724	0.543401	0.717898	1	1	1	1
hsa-miR-3945	0	0	0	0.572192	-0.196026	0.761021	0.517354	0.899348	0.492547	1	1	1
hsa-miR-3945-3p	0	0	0	0.169933	-0.361847	0.48052	1	0.525032	0.563837	1	1	1
hsa-miR-3960	0.537886	0	0	-0.492628	-0.389775	-0.0428378	0.216975	0.347705	0.857394	1	1	1
hsa-miR-3960-5p	6.68456	7.25041	7.56155	0.150493	0.0456114	0.0912347	0.434356	0.803433	0.622193	1	1	1
hsa-miR-3972	0	0	0	0.51939	-0.296249	0.781016	0.555785	0.661157	0.353855	1	1	1
hsa-miR-3972-5p	0	0	0	0.178666	0.361383	-0.25333	0.964685	0.430295	0.501275	1	1	1
hsa-miR-3973	0	0	0	0.156702	-0.446507	0.640775	1	0.807473	0.80462	1	1	1
hsa-miR-3973-5p	0	0	0	0.118607	0.00152325	0.107571	1	0.995758	0.953487	1	1	1
hsa-miR-3974	0	0	0	0.262254	0.0926063	0.155404	1	0.911361	1	1	1	1
hsa-miR-3974-3p	0	0	0	0.0946982	-0.0576726	0.165846	1	0.901465	1	1	1	1
hsa-miR-3975	0	0	0	0.482467	-0.198035	0.80346	0.67567	0.763105	0.394867	1	1	1
hsa-miR-3975-5p	0	0	0	0.242592	0.0182934	0.235516	1	0.994388	1	1	1	1
hsa-miR-3976	0.644071	0.704257	0.791636	0.5831	0.652608	-0.0886431	0.145175	0.0985224	0.790617	1	1	1
hsa-miR-3976-3p	2.07977	1.59122	1.71451	-0.034646	-0.0772311	0.172106	0.936633	0.847487	0.68724	1	1	1
hsa-miR-3977	0	0	0	0.0964953	-0.267578	0.376549	1	0.854738	0.929107	1	1	1
hsa-miR-3977-3p	0	0	0	0.506798	0.0928769	0.408179	0.872615	0.929749	1	1	1	1
hsa-miR-3978	0	0	0	0.256017	0.0591374	0.156853	1	0.884124	1	1	1	1
hsa-miR-3978-3p	0	0	0	-0.0851433	-0.189792	-0.00607675	0.776549	0.779867	0.959738	1	1	1
hsa-miR-409-3p	3296.61	3767.62	4401.83	0.294662	0.288563	-0.00273085	0.181904	0.195892	0.990246	1	1	1
hsa-miR-409-5p	95.4243	98.4778	110.461	0.0976893	0.0385446	0.0565677	0.632624	0.846487	0.779235	1	1	1
hsa-miR-410-3p	49.4192	48.9809	58.4575	-0.0564095	-0.0785819	0.0197733	0.797272	0.712641	0.924978	1	1	1
hsa-miR-410-5p	0	0	0	0.205078	0.548562	-0.291917	1	0.219913	0.440893	1	1	1
hsa-miR-411-3p	123.687	146.117	140.465	0.180727	0.296988	-0.120236	0.34207	0.125242	0.54433	1	1	1
hsa-miR-411-5p	397.414	400.645	410.956	0.084912	0.146403	-0.0608789	0.665075	0.445549	0.764398	1	1	1
hsa-miR-412-3p	1.08072	0.52513	2.01045	0.571527	-0.10046	0.68325	0.247792	0.850445	0.16156	1	1	1
hsa-miR-412-5p	20.2343	11.9163	18.6584	0.0535305	-0.208733	0.262128	0.86429	0.537432	0.410812	1	1	1
hsa-miR-421	0	0	0	0.315783	-0.153851	0.514841	0.821166	0.833072	0.675222	1	1	1
hsa-miR-421-5p	169.911	184.05	188.951	-0.00122556	-0.0145229	0.0124787	0.987419	0.86776	0.860036	1	1	1
hsa-miR-422a	0	0	0	0.270912	0.116701	0.176565	0.944932	0.974508	0.850768	1	1	1
hsa-miR-422a-3p	3.52077	3.13497	3.23348	0.0611477	-0.183463	0.271628	0.757345	0.317412	0.199341	1	1	1
hsa-miR-423-3p	14006	14612	15543.1	0.159601	0.0777649	0.0804717	0.112824	0.391848	0.397808	1	1	1
hsa-miR-423-5p	13140.9	12552.1	13493.6	0.115153	0.110835	-0.00133805	0.392764	0.393065	0.992107	1	1	1
hsa-miR-424-3p	57.1756	62.7439	58.2311	0.100448	0.119288	-0.0202022	0.471336	0.396447	0.895093	1	1	1
hsa-miR-425-3p	530.8	474.439	519.408	-0.106766	-0.189451	0.0884157	0.256888	0.0590535	0.347383	1	1	1
hsa-miR-425-5p	2604.18	2560.22	2722.97	0.0691751	-0.0104682	0.0832743	0.155683	0.818228	0.0613156	1	1	1
hsa-miR-4251	0	0	0	1.0495	0.380173	0.623141	0.491196	0.740418	0.570925	1	1	1
hsa-miR-4251-5p	0	0	0	0.551654	0.166894	0.386009	0.773727	0.89014	0.891871	1	1	1
hsa-miR-4252	0	0	0	0.683585	0.951636	-0.257065	0.433587	0.148449	0.53267	1	1	1
hsa-miR-4252-5p	0	0	0	0.393054	0.0251693	0.393094	0.780699	0.97775	0.776981	1	1	1
hsa-miR-4253	0	0	0	0.472364	0.00971484	0.457368	0.690628	0.997898	0.703139	1	1	1
hsa-miR-4253-5p	0	0	0	0.528505	NA	0.519656	0.843907	NA	0.846558	1	NA	1
hsa-miR-4254	0	0	0	0.0715619	-0.117318	0.130441	1	0.758356	1	1	1	1
hsa-miR-4254-5p	0	0	0	0.0282006	0.477988	-0.54586	0.927029	0.365029	0.298157	1	1	1
hsa-miR-4255	0	0	0	0.172975	-0.343656	0.527005	1	0.740622	0.823243	1	1	1
hsa-miR-4255-3p	0	0	0	0.179171	-0.4924	0.667196	0.886631	0.467105	0.273764	1	1	1
hsa-miR-4256	0	0	0	-0.306156	-0.0306073	-0.182938	0.654495	1	0.722207	1	1	1
hsa-miR-4256-3p	0	0	0	0.154694	-0.290986	0.410418	1	0.710523	0.851256	1	1	1
hsa-miR-4257	0	0	0	0.398451	0.0109732	0.382372	0.86475	0.984758	0.836955	1	1	1
hsa-miR-4257-5p	0	0	0	-0.105125	-0.51204	0.47002	0.733829	0.418535	1	1	1	1
hsa-miR-4258	0	0	0	0.407116	0.229932	0.189471	0.823761	0.666208	1	1	1	1
hsa-miR-4258-3p	1.27863	1.38451	1.52297	0.178321	-0.0799055	0.312087	0.556742	0.79395	0.32005	1	1	1
hsa-miR-4259	0	0	0	0.487568	0.15739	0.377931	0.400203	0.73218	0.506221	1	1	1
hsa-miR-4259-5p	0	0.819452	0	0.175292	0.717673	-0.676206	0.850931	0.127617	0.123892	1	1	1
hsa-miR-4260	0	0	0	-0.0474284	0.544494	-0.549363	0.891359	0.299668	0.300645	1	1	1
hsa-miR-4260-3p	0	0	0	-0.219391	-0.912781	0.679455	0.646606	0.182587	0.553515	1	1	1
hsa-miR-4261	0	0	0	0.44033	0.402802	0.0976667	0.821101	0.698623	1	1	1	1
hsa-miR-4261-5p	0.614648	1.33806	1.09588	0.518993	0.540554	-0.0490025	0.221694	0.1849	0.897169	1	1	1
hsa-miR-4262	0	0	0	0.0154178	-0.129946	0.160117	1	0.833533	1	1	1	1
hsa-miR-4262-3p	0	0	0	0.412273	0.307246	0.137098	0.726603	0.781304	0.880364	1	1	1
hsa-miR-4263	0	0	0	0.473183	0.230118	0.228993	0.891484	0.873932	1	1	1	1
hsa-miR-4263-5p	0	0	0	0.259534	0.0228473	0.250839	0.977808	1	0.93305	1	1	1
hsa-miR-4264	0	0	0	0.174419	0.0891503	0.0881334	1	0.944568	1	1	1	1
hsa-miR-4264-3p	0	0	0	0.395292	0.0945546	0.320835	0.909094	0.940579	0.957572	1	1	1
hsa-miR-4265	0.236581	0	0	-0.13569	-0.430054	0.252635	0.704586	0.337219	0.676679	1	1	1
hsa-miR-4265-5p	0	0	0	-0.0229357	-0.193052	0.166921	0.913108	0.663034	0.80466	1	1	1
hsa-miR-4266	0	0	0	0.391289	-0.0503152	0.449201	0.920965	0.962599	0.865119	1	1	1
hsa-miR-4266-5p	0	0	0	0.253306	0.0217154	0.235516	1	1	1	1	1	1
hsa-miR-4267	0	0	0	0.59867	0.106486	0.496028	0.709074	1	0.697858	1	1	1
hsa-miR-4267-3p	0	0	0	0.371113	-0.149818	0.54955	1	0.875114	0.850932	1	1	1
hsa-miR-4268	0	0	0	0.397103	0.412351	-0.0207735	0.80163	0.537444	0.904407	1	1	1
hsa-miR-4268-5p	0	0	0	0.743842	0.0123005	0.696032	0.421854	0.979992	0.400469	1	1	1
hsa-miR-4269	0	0	0	-0.444922	-0.445929	0.0290881	0.386596	0.373709	1	1	1	1
hsa-miR-4269-3p	0	0	0	0.634041	0.307339	0.307116	0.387926	0.629764	0.645817	1	1	1
hsa-miR-4270	0	0	0	0.234481	-0.127334	0.373107	1	0.901721	1	1	1	1
hsa-miR-4270-3p	0	0	0	0.53068	0.162602	0.389297	0.778231	0.99436	0.802459	1	1	1
hsa-miR-4271	0	0	0	0.193542	-0.213425	0.408037	1	0.765671	0.752192	1	1	1
hsa-miR-4271-5p	0	0	0	0.165626	-0.340319	0.516146	1	0.790716	0.853183	1	1	1
hsa-miR-4272-5p	0	0	0	0.246434	-0.0542952	NA	1	0.960934	NA	1	1	NA
hsa-miR-4273	0	0	0	0.259527	0.223261	0.00551151	0.649597	0.655348	0.950259	1	1	1
hsa-miR-4273-3p	1.17859	0.701597	0.365967	-0.467923	-0.766417	0.364218	0.227185	0.0526309	0.370852	1	1	1
hsa-miR-4274	0	0	0	1.02138	0.572799	0.335185	0.0898897	0.311269	0.538429	1	1	1
hsa-miR-4274-5p	0	0	0	1.38087	-0.131	1.50648	0.135554	0.927667	0.0974242	1	1	1
hsa-miR-4275	0	0	0	0.3196	0.0140834	0.304168	1	0.987924	1	1	1	1
hsa-miR-4275-3p	0	0	0	0.97666	0.0395353	0.977055	0.224537	0.907542	0.276964	1	1	1
hsa-miR-4276	0	0	0	0.256745	-0.200671	0.448652	1	0.877234	0.853302	1	1	1
hsa-miR-4276-3p	0	0	0	0.996867	0.104093	0.839549	0.218954	0.881763	0.401143	1	1	1
hsa-miR-4277	1.77773	1.20208	1.61311	0.161751	-0.293784	0.512928	0.612949	0.304652	0.136614	1	1	1
hsa-miR-4277-3p	0	0	0	-0.0783285	0.487478	-0.601524	0.809674	0.27976	0.207573	1	1	1
hsa-miR-4278	0	0.647676	0	0.383761	0.68796	-0.196444	0.492622	0.144571	0.712197	1	1	1
hsa-miR-4278-5p	0	0	0	0.322058	0.373527	-0.0649549	0.963771	0.696744	0.887319	1	1	1
hsa-miR-4279	0	0	0	-0.0552565	0.058632	-0.144048	0.859466	0.923146	0.764591	1	1	1
hsa-miR-4279-5p	0	0	0	-0.0306494	0.0199067	-0.0469121	0.936048	0.962241	0.882596	1	1	1
hsa-miR-4280	0	0	0	0.176655	0.0885913	0.0949661	0.972983	0.918539	1	1	1	1
hsa-miR-4280-3p	0	0	0	-0.174897	-0.342842	0.159847	0.656861	0.522972	1	1	1	1
hsa-miR-4281	0	0	0	0.4164	-0.542664	0.918576	0.643469	0.235546	0.117798	1	1	1
hsa-miR-4281-5p	0	0	0	0.170487	-0.125518	0.314623	1	0.858811	0.817323	1	1	1
hsa-miR-4282	0	0	0	0.616761	0.298446	0.316688	0.774033	0.850661	0.905999	1	1	1
hsa-miR-4282-5p	0	0	0	0.243561	-0.195715	0.44867	1	0.884028	0.861249	1	1	1
hsa-miR-4283	0	0	0	0.76221	0.214847	0.472748	0.556636	0.896278	0.687449	1	1	1
hsa-miR-4283-3p	0.598735	0.448973	0	0.00395279	0.0275494	-0.0959092	0.997768	0.947816	0.832759	1	1	1
hsa-miR-4284	0	0	0	0.3944	0.314679	0.0695332	0.834949	0.708587	1	1	1	1
hsa-miR-4284-3p	2.06438	2.44089	2.21375	0.303381	0.183464	0.139312	0.283792	0.415139	0.624373	1	1	1
hsa-miR-4285	1.04832	0.701597	0	-0.0858776	-0.556623	0.511716	0.836052	0.19054	0.273042	1	1	1
hsa-miR-4285-3p	0	0	0	0.398635	0.602322	-0.216633	0.752373	0.331914	0.666944	1	1	1
hsa-miR-4286	0	0	0	0.316777	0.0869815	0.22844	0.937104	0.943653	1	1	1	1
hsa-miR-4286-3p	93.8049	81.439	75.9598	-0.0547272	-0.149872	0.094612	0.752721	0.421131	0.607168	1	1	1
hsa-miR-4287	0	0	0	0.31132	-0.116796	0.461039	1	0.933109	0.917487	1	1	1
hsa-miR-4287-3p	0	0	0	-0.0476521	-0.208945	0.182757	0.933151	0.767324	0.868883	1	1	1
hsa-miR-4288	0	0	0	0.350078	0.16174	0.163839	0.97448	0.862419	1	1	1	1
hsa-miR-4288-5p	0	0	0	0.148068	0.0114623	0.151127	1	0.98266	1	1	1	1
hsa-miR-4289	0	0	0	0.449506	-0.192124	0.627511	0.893587	0.847275	0.735225	1	1	1
hsa-miR-4289-3p	0	0	0	0.445357	0.274576	0.159508	0.639479	0.700948	0.905966	1	1	1
hsa-miR-429	0	0	0	1.08449	0.233275	0.855238	0.242513	0.877058	0.273151	1	1	1
hsa-miR-429-5p	5.0987	5.36347	5.23296	-0.0235705	0.221663	-0.206179	0.914414	0.313238	0.247222	1	1	1
hsa-miR-4290	0	0	0	0.366275	0.143114	0.184652	0.670302	0.870546	0.820378	1	1	1
hsa-miR-4290-5p	0	0	0	0.140566	0.0483805	0.12998	1	1	1	1	1	1
hsa-miR-4291	0	0	0	0.22238	-0.205742	0.438104	1	0.876862	0.873068	1	1	1
hsa-miR-4291-3p	0	0	0	0.590942	0.204516	0.391933	0.5948	0.801998	0.725802	1	1	1
hsa-miR-4292	0	0	0	0.324867	0.105716	0.228533	1	0.863835	1	1	1	1
hsa-miR-4292-5p	0	0	0	0.472385	0.0935772	0.382555	0.862907	0.964196	0.887144	1	1	1
hsa-miR-4293	0	0	0	0.242313	0.157841	0.0968272	1	0.895881	1	1	1	1
hsa-miR-4293-5p	0	0	0	0.462109	0.0214052	0.454708	0.826865	1	0.792451	1	1	1
hsa-miR-4294	0	0	0	0.396235	-0.0512648	0.448767	0.908495	0.958021	0.843397	1	1	1
hsa-miR-4294-3p	0	0	0	0.172519	-0.334353	0.535865	1	0.595488	0.570046	1	1	1
hsa-miR-4295	0	0	0	0.234289	-0.112513	0.303511	0.883806	0.871101	0.783873	1	1	1
hsa-miR-4295-3p	0	0	0	0.440598	-0.0966706	0.552654	0.607544	0.814841	0.397358	1	1	1
hsa-miR-4296	0	0	0	0.219063	0.102976	0.109126	1	0.845713	1	1	1	1
hsa-miR-4296-3p	0.752531	0.520696	0.446747	0.447718	0.185652	0.157092	0.240746	0.648659	0.736139	1	1	1
hsa-miR-4297	0	0	0	0.347909	-0.147124	0.502315	0.948918	0.772687	0.607762	1	1	1
hsa-miR-4297-3p	0	0	0	0.331866	-0.0438245	0.380439	0.978716	0.964983	0.884944	1	1	1
hsa-miR-4298	0	0	0	0.111109	0.149177	-0.0415856	1	1	0.905109	1	1	1
hsa-miR-4298-3p	0	0	0	0.22764	-0.0428365	0.251628	0.897495	0.898253	0.784323	1	1	1
hsa-miR-4299	0	0	0	0.399398	0.0205402	0.400788	0.873197	0.98277	0.852071	1	1	1
hsa-miR-4299-5p	0	0	0	0.0380545	-0.194066	0.239175	1	0.86969	1	1	1	1
hsa-miR-4300	0	0	0	0.185882	0.387741	-0.201031	0.831862	0.5055	0.71316	1	1	1
hsa-miR-4300-5p	0	0	0	0.385679	0.171842	0.178624	0.88231	0.76647	0.983683	1	1	1
hsa-miR-4301	0	0	0	0.246137	0.456741	-0.187913	1	0.66449	0.79366	1	1	1
hsa-miR-4301-3p	0.435472	0	0	0.134886	-0.0832756	0.190079	0.904454	0.810988	0.744394	1	1	1
hsa-miR-4302	0	0	0	0.874882	0.23215	0.6233	0.457789	0.895779	0.494473	1	1	1
hsa-miR-4302-3p	0.535759	0.225209	0	0.486787	-0.404328	0.868828	0.418683	0.370147	0.154587	1	1	1
hsa-miR-4303	0	0	0	0.246434	0.0937454	0.163585	1	0.939957	1	1	1	1
hsa-miR-4303-3p	0	0	0	0.471808	0.372217	0.0914254	0.766837	1	1	1	1	1
hsa-miR-4304	0	0	0	0.81415	0.088515	0.749175	0.707692	0.929725	0.930164	1	1	1
hsa-miR-4304-3p	0	0	0	0.315848	-0.202688	0.522431	0.954623	0.874077	0.810365	1	1	1
hsa-miR-4305	0	0	0	0.185539	0.835292	-0.42497	1	0.459628	0.575417	1	1	1
hsa-miR-4305-3p	0	0.897947	0	0.305104	0.662616	-0.332027	0.57632	0.117625	0.421481	1	1	1
hsa-miR-4306	1.235	1.52302	1.00966	-0.0713588	0.166652	-0.291976	0.840552	0.575864	0.378498	1	1	1
hsa-miR-4306-5p	0.92719	1.07217	0.763064	-0.0104497	0.255188	-0.259817	0.962239	0.44718	0.451571	1	1	1
hsa-miR-4307	0	0	0	0.62297	-0.0542958	0.697231	0.80241	0.943868	0.716449	1	1	1
hsa-miR-4307-5p	0	0	0	0.0714639	-0.204429	0.30803	1	0.864706	0.936236	1	1	1
hsa-miR-4308	0	0	0	0.561382	-0.0472842	0.612803	0.778593	1	0.81132	1	1	1
hsa-miR-4308-5p	0	0	0	NA	0.241618	0.101997	NA	0.900737	1	NA	1	1
hsa-miR-4309	0.961641	0.842569	0.778431	-0.0241543	-0.1192	0.103218	0.943731	0.737614	0.794079	1	1	1
hsa-miR-4309-3p	0	0	0	0.685775	-0.208112	0.917546	0.151341	0.713275	0.080927	1	1	1
hsa-miR-431-3p	18.5601	21.46	21.2698	0.349479	0.246172	0.0999035	0.102267	0.267821	0.665993	1	1	1
hsa-miR-431-5p	119.538	139.824	134.063	0.204066	0.171117	0.0343247	0.291176	0.38427	0.860429	1	1	1
hsa-miR-4310	0	0	0	0.912977	0.362542	0.570488	0.449962	0.730857	0.509563	1	1	1
hsa-miR-4310-5p	0	0	0	0.246263	-0.126716	0.376376	1	0.928872	0.898927	1	1	1
hsa-miR-4311	0	0	0	0.680466	-0.412907	1.12879	0.269975	0.389226	0.0848969	1	1	1
hsa-miR-4311-3p	0	0	0	-0.0224289	-0.664512	0.459331	0.903483	0.756765	0.504696	1	1	1
hsa-miR-4312	1.3175	1.0797	1.68253	-0.0815924	-0.298847	0.205822	0.832935	0.437181	0.57279	1	1	1
hsa-miR-4312-5p	0	0	0	0.261678	0.318413	-0.0359294	0.947467	0.709326	0.90039	1	1	1
hsa-miR-4313	0	0	0	0.235613	-0.0277622	0.218818	0.708564	1	0.866885	1	1	1
hsa-miR-4313-3p	0	0	0	0.145171	0.0310492	0.111406	0.901428	0.945704	1	1	1	1
hsa-miR-4314	0	0	0	0.299469	0.224869	0.101699	0.88246	0.782938	1	1	1	1
hsa-miR-4314-3p	0	0	0	1.03588	-0.0617596	1.12002	0.186543	0.957113	0.141948	1	1	1
hsa-miR-4315	0	0	0	0.292297	-0.0770975	0.361761	1	0.855273	0.7361	1	1	1
hsa-miR-4315-3p	0	0	0	0.100457	0.164912	-0.0282693	1	1	0.925237	1	1	1
hsa-miR-4316	0	0	0	0.0671607	-0.594482	0.693893	1	0.353998	0.306066	1	1	1
hsa-miR-4316-3p	0	0	0	0.15793	0.00209328	0.176295	1	1	0.922479	1	1	1
hsa-miR-4317-3p	0	0	0	0.570347	-0.143814	0.688824	0.612278	0.79485	0.449129	1	1	1
hsa-miR-4318	0	0	0	0.24587	-0.123295	0.376549	1	0.895266	0.929107	1	1	1
hsa-miR-4318-5p	0	0	0	0.467985	0.16075	0.317867	0.878943	0.907306	0.939269	1	1	1
hsa-miR-4319	0	0	0	0.415163	-0.118093	0.533738	1	0.919923	0.850639	1	1	1
hsa-miR-4319-3p	0	0	0.619115	0.723654	-0.0428114	0.847397	0.140367	0.88498	0.0847868	1	1	1
hsa-miR-432-3p	0.258867	0.537592	0	-0.0691908	-0.387687	0.314184	0.866771	0.358341	0.464075	1	1	1
hsa-miR-432-5p	533.868	629.513	626.988	0.261133	0.235647	0.0212154	0.188594	0.249885	0.919805	1	1	1
hsa-miR-4320	0	0	0	0.205807	0.557717	-0.309784	1	0.346485	0.52668	1	1	1
hsa-miR-4320-5p	0	0	0	0.145392	-0.248749	0.371838	1	0.880036	0.962363	1	1	1
hsa-miR-4321	0	0	0	0.373141	-0.0561681	0.456076	0.762868	0.923389	0.656052	1	1	1
hsa-miR-4321-5p	0	0	0	0.504077	0.0635473	0.404727	0.670604	0.934994	0.731395	1	1	1
hsa-miR-4322	0	0.931838	0	0.460018	0.649684	-0.233444	0.32939	0.111801	0.523992	1	1	1
hsa-miR-4322-5p	0	0	0	0.202122	-0.360569	0.583326	0.854615	0.755401	0.5941	1	1	1
hsa-miR-4323	0	0.475414	0.22217	0.402022	0.519264	-0.133178	0.39703	0.252264	0.68747	1	1	1
hsa-miR-4323-5p	0	0	0	0.156702	0.579831	-0.425633	1	0.266697	0.317941	1	1	1
hsa-miR-4324	0	0	0	-0.0362465	-0.343047	0.289185	0.888167	0.716703	1	1	1	1
hsa-miR-4324-5p	0	0	0	0.702674	-0.103788	0.851578	0.324941	1	0.335631	1	1	1
hsa-miR-4325	0.619832	0	0	-0.695687	-0.143801	-0.629065	0.0885365	0.777582	0.153772	1	1	1
hsa-miR-4325-3p	0	0	0	0.043489	-0.555594	0.569723	1	0.513224	0.768878	1	1	1
hsa-miR-4326	63.4342	77.2754	62.2488	-0.00416212	0.178229	-0.183076	0.986372	0.49831	0.41869	1	1	1
hsa-miR-4326-5p	2.00709	1.63176	2.24091	0.299602	-0.138686	0.428002	0.439001	0.715064	0.293407	1	1	1
hsa-miR-4327	0.639313	0	0.628569	0.993349	-0.983949	2.00437	0.0501887	0.0508585	0.000632525	1	1	1
hsa-miR-4327-3p	1.07295	0.87167	1.15514	0.535973	0.178906	0.37615	0.197967	0.623669	0.355358	1	1	1
hsa-miR-4328	0	0	0	0.0112851	-0.286228	0.307288	1	0.750432	0.956441	1	1	1
hsa-miR-4328-5p	0	0	0	0.618234	0.166166	0.459088	0.717239	0.929094	0.775869	1	1	1
hsa-miR-4329	0	0	0	0.584484	0.295855	0.305389	0.790819	0.722248	1	1	1	1
hsa-miR-4329-5p	0	0	0	-0.218964	-0.335417	0.174944	0.665152	0.525387	0.851792	1	1	1
hsa-miR-433-3p	255.4	309.95	368.492	0.395686	0.426411	-0.0332439	0.0539174	0.0481753	0.881153	1	1	1
hsa-miR-433-5p	0	1.1372	0.304014	0.205004	0.840983	-0.590118	0.748997	0.0187094	0.0743683	1	1	1
hsa-miR-4330	0	0	0	0.00994008	-0.27514	0.293515	1	0.743126	1	1	1	1
hsa-miR-4330-5p	0.741324	1.64604	1.50882	0.288658	0.194117	0.166364	0.573779	0.686896	0.727532	1	1	1
hsa-miR-4418	0.664915	0.981828	0.683684	0.448557	0.148386	0.343156	0.475538	0.782272	0.551221	1	1	1
hsa-miR-4418-5p	0	0	0	0.0172961	-0.0576868	0.0877526	1	0.934451	1	1	1	1
hsa-miR-4420	0	0	0	0.226131	0.152075	0.0813552	1	0.820807	1	1	1	1
hsa-miR-4420-5p	0	0	0	0.529917	0.230801	0.301221	0.756961	0.862078	1	1	1	1
hsa-miR-4421	0	0	0	0.552134	-0.0507056	0.610793	0.697735	0.975698	0.70411	1	1	1
hsa-miR-4421-5p	0.778981	1.08507	0.968463	0.438717	0.47847	-0.087508	0.250464	0.160804	0.796776	1	1	1
hsa-miR-4422	2.25994	1.67554	1.83629	0.0732117	0.152724	-0.117428	0.806105	0.631185	0.719119	1	1	1
hsa-miR-4422-3p	0.970363	0.845299	0.569852	-0.317813	-0.262294	-0.0102864	0.384035	0.456644	0.957151	1	1	1
hsa-miR-4423-3p	0	0	0	0.464392	0.259874	0.248212	0.750805	0.733035	1	1	1	1
hsa-miR-4423-5p	0	0	0	0.47402	NA	0.454447	0.871858	NA	0.877558	1	NA	1
hsa-miR-4424	0	0	0	0.0340873	-0.0127995	-0.0328044	0.976473	0.963988	0.929759	1	1	1
hsa-miR-4424-3p	0	0	0	0.309618	0.427406	-0.115259	1	0.448857	0.703203	1	1	1
hsa-miR-4425	0	0	0	0.780451	0.482542	0.292906	0.142595	0.242839	0.610795	1	1	1
hsa-miR-4425-5p	0	0	0	-0.187876	-0.217614	0.0767833	0.608153	0.740565	1	1	1	1
hsa-miR-4426	0	0	0	1.05843	0.579763	0.507543	0.423302	0.68233	0.546636	1	1	1
hsa-miR-4426-3p	0	0	0	0.440552	0.39594	0.0342531	0.591756	0.436232	1	1	1	1
hsa-miR-4427	0	0	0	0.964164	0.0832506	0.930224	0.723362	0.965082	0.752145	1	1	1
hsa-miR-4427-5p	0	0	0	0.253106	0.71744	-0.382996	1	0.439068	0.514593	1	1	1
hsa-miR-4428	0	0	0	0.558629	-0.122736	0.683625	0.744755	0.929368	0.743158	1	1	1
hsa-miR-4428-5p	0	0	0	0.238592	0.155013	0.0833791	1	0.900805	1	1	1	1
hsa-miR-4429	0	0	0	0.400368	0.0992784	0.317443	0.966136	0.960522	1	1	1	1
hsa-miR-4429-3p	7.27369	7.73027	8.68874	0.105944	0.08258	-0.00795757	0.490014	0.606334	0.958365	1	1	1
hsa-miR-4430	1.93145	0.746249	1.12841	-0.597952	-0.835444	0.254076	0.0289433	0.00228842	0.438429	1	1	1
hsa-miR-4430-3p	0.961641	1.12868	0.834507	-0.13023	0.152444	-0.298393	0.705622	0.639193	0.36442	1	1	1
hsa-miR-4431	0	0	0	0.249294	-0.205136	0.477045	0.955365	0.813136	0.765656	1	1	1
hsa-miR-4431-3p	0	0	0	-0.390953	-0.572689	0.20659	0.369809	0.366342	1	1	1	1
hsa-miR-4432	0	0	0	-0.404727	-0.809741	0.4976	0.645939	0.352636	0.498208	1	1	1
hsa-miR-4432-5p	0	0	0	0.247322	0.091008	0.155689	1	0.905887	1	1	1	1
hsa-miR-4433a-3p	2.08134	2.07705	2.25682	0.0311795	0.205993	-0.205682	0.898971	0.380412	0.396451	1	1	1
hsa-miR-4433a-5p	10.2188	9.2554	9.92849	-0.13821	-0.136593	0.0152878	0.403106	0.444526	0.926817	1	1	1
hsa-miR-4433b-3p	483.29	563.59	403.788	-0.113927	0.222334	-0.334648	0.402767	0.0885061	0.0104704	1	1	1
hsa-miR-4433b-5p	1172.18	1317.13	1421.47	0.0616673	0.0755943	-0.0164581	0.686778	0.663715	0.924134	1	1	1
hsa-miR-4434	0	0	0	0.268855	-0.101043	0.415071	0.89224	0.921432	0.697234	1	1	1
hsa-miR-4434-3p	0	0	0	-0.00563837	-0.250614	0.111735	0.942287	0.624184	0.861199	1	1	1
hsa-miR-4435	0	0	0	0.366562	0.23407	0.14156	0.707318	0.929006	0.816041	1	1	1
hsa-miR-4435-3p	14.7265	17.0509	15.6246	0.0690966	0.252804	-0.206744	0.635865	0.0653697	0.160143	1	1	1
hsa-miR-4436a	0	0	0	0.7937	0.213318	0.581291	0.496134	1	0.535616	1	1	1
hsa-miR-4436a-5p	0	0	0	-0.414246	0.0316795	-0.481748	0.429411	0.946699	0.379751	1	1	1
hsa-miR-4436b-3p	0	0	0	0.0165783	-0.0803455	0.106272	1	0.817834	0.880986	1	1	1
hsa-miR-4436b-5p	0.236581	0	0	0.131782	0.0599847	0.0412592	1	0.904836	1	1	1	1
hsa-miR-4437	0	0	0	0.0449441	-0.0108563	0.0764771	1	0.973715	1	1	1	1
hsa-miR-4437-5p	0	0	0	0.455415	0.304494	0.142469	0.793277	0.812127	0.964159	1	1	1
hsa-miR-4438	0	0	0	0.111818	0.39034	-0.235415	1	0.604872	0.702008	1	1	1
hsa-miR-4438-5p	0	0	0	-0.0190614	-0.121758	0.0890591	0.937725	0.865816	1	1	1	1
hsa-miR-4439	0	0	0	0.362405	0.0980237	0.254157	0.883717	0.918984	0.967287	1	1	1
hsa-miR-4439-3p	0	0	0	0.590888	0.305848	0.324753	0.775773	0.854836	0.897811	1	1	1
hsa-miR-4440	0	0	0	0.379846	0.519699	-0.155813	0.75222	0.324943	0.654355	1	1	1
hsa-miR-4440-5p	0	0	0	0.218035	0.819379	-0.721029	0.826718	0.118778	0.184665	1	1	1
hsa-miR-4441	0.516262	0.616372	0	-0.764703	0.125407	-0.787041	0.114398	0.805528	0.0528025	1	1	1
hsa-miR-4441-5p	0	0.693452	0.189117	-0.0488327	0.0404867	0.0259252	0.946354	0.925813	0.966016	1	1	1
hsa-miR-4442	0	0	0	0.413036	0.0652574	0.348505	1	1	0.77791	1	1	1
hsa-miR-4442-5p	0	0	0	0.105598	-0.384765	0.494803	1	0.509235	0.744442	1	1	1
hsa-miR-4443	0	0	0	0.387056	0.0907144	0.307465	0.894338	0.932254	1	1	1	1
hsa-miR-4443-3p	14.8318	14.8376	13.894	-0.0686678	0.00918372	-0.0673923	0.64413	0.95725	0.672448	1	1	1
hsa-miR-4444	0	0	0	-0.118811	-0.322571	0.205432	0.782162	0.483248	0.716269	1	1	1
hsa-miR-4444-5p	0.623251	0	0.526184	0.157001	-0.170621	0.372345	0.710614	0.673384	0.411727	1	1	1
hsa-miR-4445-3p	0	0	0	0.314909	-0.057637	0.379965	0.928218	0.968018	0.890306	1	1	1
hsa-miR-4445-5p	0	0	0	0.168103	-0.130616	NA	1	0.930796	NA	1	1	NA
hsa-miR-4446-3p	230.311	225.135	249.742	0.131769	0.0623998	0.0616117	0.0833622	0.475091	0.474339	1	1	1
hsa-miR-4446-5p	1.25194	1.31493	2.10668	0.400216	-0.0107572	0.401699	0.177148	0.971139	0.133648	1	1	1
hsa-miR-4447	0	0	0	0.29538	-0.36158	0.899398	0.839345	0.84605	0.35041	1	1	1
hsa-miR-4447-5p	0	0	0	0.205162	0.0792809	0.112034	1	0.964933	1	1	1	1
hsa-miR-4448	0	0	0	0.0949589	0.152141	-0.0541404	1	0.822106	0.907075	1	1	1
hsa-miR-4448-5p	5.77842	6.04001	4.3517	-0.0900935	-0.0915141	0.0177948	0.687894	0.677272	0.940759	1	1	1
hsa-miR-4449	2.95686	2.94328	3.45734	0.164154	-0.00353426	0.18455	0.484861	0.988328	0.411668	1	1	1
hsa-miR-4449-5p	0.275982	0.647676	0.744201	0.661238	0.52342	0.137351	0.119757	0.215668	0.777823	1	1	1
hsa-miR-4450	0	0	0	0.316975	0.0858651	0.235636	0.934666	0.963889	0.977291	1	1	1
hsa-miR-4450-3p	0	0	0	0.884687	-0.0377676	0.899963	0.139282	0.903859	0.116809	1	1	1
hsa-miR-4451	0	0	0	0.444973	0.0258966	0.470362	0.851046	1	0.808431	1	1	1
hsa-miR-4451-5p	0	0	0	-0.266598	0.258284	-0.513386	0.495288	0.600328	0.249598	1	1	1
hsa-miR-4452	0	0	0	0.0831949	0.387849	-0.329983	1	0.388609	0.414735	1	1	1
hsa-miR-4452-5p	0	0	0	0.430126	0.217798	0.164615	0.54556	0.773773	0.78731	1	1	1
hsa-miR-4453	0	0	0	0.308389	-0.0820503	0.391277	0.868114	0.907916	0.767953	1	1	1
hsa-miR-4453-3p	0	0	0	0.331167	0.198779	0.110593	1	0.788023	1	1	1	1
hsa-miR-4454	0	0	0	0.19837	-0.128863	0.318052	1	0.842948	1	1	1	1
hsa-miR-4454-3p	26.226	23.9538	24.3116	-0.04026	-0.230705	0.193063	0.839552	0.228969	0.326215	1	1	1
hsa-miR-4455	0	0	0	0.628531	0.0177349	0.630967	0.800707	1	0.791421	1	1	1
hsa-miR-4455-3p	0	0	0	0.173174	-0.23692	0.481157	0.763345	0.592867	0.397415	1	1	1
hsa-miR-4456	0	0	0	0.314739	-0.0535685	0.375191	0.942557	0.958846	0.872329	1	1	1
hsa-miR-4456-3p	0	0	0	0.153482	-0.0885102	0.25287	1	0.919397	1	1	1	1
hsa-miR-4457	0	0	0	0.398811	-0.345198	0.763568	0.665929	0.763985	0.507227	1	1	1
hsa-miR-4457-5p	0	0	0	0.520572	0.376017	0.175386	0.799666	0.64244	1	1	1	1
hsa-miR-4458	0	0	0	0.406189	-0.152515	0.518087	0.685386	0.762191	0.557454	1	1	1
hsa-miR-4458-3p	0	0	0	0.45015	0.650632	-0.268082	0.372322	0.165889	0.55345	1	1	1
hsa-miR-4460	0	0	0	0.633978	0.543362	0.0713601	0.302375	0.290677	1	1	1	1
hsa-miR-4460-3p	0	0	0	0.129758	-0.196795	0.351199	1	0.703518	0.639478	1	1	1
hsa-miR-4462	0	0	0	0.415871	0.0895354	0.327029	0.888268	0.969458	0.93315	1	1	1
hsa-miR-4462-5p	0	0	0	0.490647	0.0211562	0.47766	0.83898	0.979822	0.871105	1	1	1
hsa-miR-4463	0	0	0	-0.412375	-0.746783	0.335529	0.462506	0.27285	0.781326	1	1	1
hsa-miR-4463-5p	0	0	0	0.415297	0.435307	-0.0116046	0.635845	0.338306	0.934923	1	1	1
hsa-miR-4464	0	0	0	0.259654	-0.119314	0.376549	1	0.926063	0.929107	1	1	1
hsa-miR-4464-3p	0	0	0	0.367299	0.0346881	0.333836	0.623888	0.980429	0.638752	1	1	1
hsa-miR-4465	0	0	0	0.387776	0.165608	0.238255	0.928959	0.909173	1	1	1	1
hsa-miR-4465-5p	0	0	0	0.170689	0.0174246	0.16702	1	1	1	1	1	1
hsa-miR-4466	0.736928	1.07217	1.1223	0.519258	0.537976	0.0181501	0.164364	0.127223	0.958041	1	1	1
hsa-miR-4466-3p	1.3175	1.34401	1.11252	-0.116643	0.382135	-0.550852	0.727151	0.305881	0.146086	1	1	1
hsa-miR-4467	0	0	0	0.306746	-0.349206	0.636198	0.636397	0.454869	0.246202	1	1	1
hsa-miR-4467-3p	0	0	0	0.424807	-0.450777	0.898167	0.69385	0.349243	0.154038	1	1	1
hsa-miR-4468	0	0	0	0.0754722	-0.338827	0.426587	1	0.572815	0.741535	1	1	1
hsa-miR-4468-5p	0	0	0	-0.024133	0.0292712	-0.0543703	0.915565	0.945602	0.87086	1	1	1
hsa-miR-4469	0	0	0	0.70376	0.404212	0.268534	0.561042	0.571762	1	1	1	1
hsa-miR-4469-5p	0	0.225209	0	0.168754	0.410763	-0.275619	0.770769	0.334863	0.497965	1	1	1
hsa-miR-4470	0.534849	1.08047	0.846252	0.403983	0.149901	0.265314	0.395998	0.726343	0.482705	1	1	1
hsa-miR-4470-5p	6.5588	7.47443	7.20332	0.0383079	-0.0150529	0.0283522	0.778534	0.910573	0.835345	1	1	1
hsa-miR-4471	0	0	0	0.229185	-0.217819	0.492729	0.918821	0.775072	0.613954	1	1	1
hsa-miR-4471-5p	0	0	0	0.307178	-0.199447	0.519443	1	0.872486	0.799341	1	1	1
hsa-miR-4472	2.05987	2.13555	1.94381	0.0170171	0.284076	-0.260282	0.948602	0.251623	0.340959	1	1	1
hsa-miR-4472-1-5p	1.19747	0.608227	1.22905	0.434371	0.0587708	0.402755	0.198174	0.8768	0.245712	1	1	1
hsa-miR-4472-2-3p	1.47011	2.03234	1.81027	0.213951	0.316533	-0.0862983	0.461204	0.199501	0.741865	1	1	1
hsa-miR-4473	1.36885	1.33913	1.15245	-0.380558	-0.147968	-0.210748	0.190873	0.596295	0.457044	1	1	1
hsa-miR-4473-5p	10.6885	11.2762	10.3689	-0.0536748	0.095223	-0.173534	0.709694	0.48366	0.189877	1	1	1
hsa-miR-4474-3p	1.00159	1.0776	1.26792	0.347911	0.0294998	0.34508	0.269989	0.926908	0.271061	1	1	1
hsa-miR-4474-5p	0	0	0	0.960589	0.540436	0.385321	0.163456	0.35616	0.623291	1	1	1
hsa-miR-4475	0	0	0	0.411295	0.0973276	0.320595	0.841236	0.953901	0.881682	1	1	1
hsa-miR-4475-5p	0	0	0	0.242592	0.0182928	0.2321	1	0.993651	1	1	1	1
hsa-miR-4476	0	0	0	0.0791468	-0.00147017	0.0924626	1	1	1	1	1	1
hsa-miR-4476-5p	0	0	0	0.107552	-0.0573974	0.161713	1	1	1	1	1	1
hsa-miR-4477a	0	0.198769	0.783492	0.443653	0.337423	0.0701308	0.352778	0.462577	0.892888	1	1	1
hsa-miR-4477b-3p	0	0	0	0.366528	-0.0138851	0.367043	0.672087	0.956496	0.612809	1	1	1
hsa-miR-4477b-5p	0	0	0	0.16634	-0.215707	0.361753	0.770422	0.638892	0.434877	1	1	1
hsa-miR-4478	0	0	0	0.175386	-0.202309	0.383506	1	0.830958	0.904393	1	1	1
hsa-miR-4478-3p	0	0	0	0.500436	0.618837	-0.139258	0.408635	0.18245	0.675973	1	1	1
hsa-miR-4479	0	0	0	0.289276	0.344139	-0.023212	0.90886	0.569877	0.877953	1	1	1
hsa-miR-4479-5p	0	0.621284	0.22217	0.230564	0.0599964	0.238874	0.624461	0.877941	0.599171	1	1	1
hsa-miR-448	0	0	0	0.230322	-0.0486699	0.286147	1	1	1	1	1	1
hsa-miR-448-5p	0	0	0	0.35207	0.156696	0.135827	0.579915	0.734547	0.971227	1	1	1
hsa-miR-4480	0	0	0	0.751896	0.240183	0.554762	0.596328	0.845485	0.638262	1	1	1
hsa-miR-4480-5p	0	0	0	0.319543	-0.0625523	0.390432	0.921784	0.957597	0.859925	1	1	1
hsa-miR-4481-3p	0	0	0	0.547576	-0.0495163	0.553496	0.478029	0.921108	0.401894	1	1	1
hsa-miR-4482-3p	0	0	0	0.709575	0.243442	0.498058	0.281209	0.677722	0.501876	1	1	1
hsa-miR-4482-5p	0	0.340566	0	0.995759	0.46722	0.433062	0.103979	0.305318	0.454096	1	1	1
hsa-miR-4483	0	0	0	0.456156	0.2343	0.228733	0.862199	0.888143	1	1	1	1
hsa-miR-4483-5p	0	0	0	0.397295	0.162299	0.241099	0.884117	0.837561	1	1	1	1
hsa-miR-4484	0	0	0	0.129644	0.352506	-0.184241	1	0.625354	0.66329	1	1	1
hsa-miR-4484-5p	2.06143	1.54944	1.70323	-0.0286804	-0.247621	0.206191	0.9113	0.360574	0.446619	1	1	1
hsa-miR-4485-3p	0	1.02434	0.676478	0.388087	0.712742	-0.374118	0.395595	0.109692	0.382659	1	1	1
hsa-miR-4485-5p	0	0	0	0.0496938	0.417284	-0.323271	1	0.586561	0.648418	1	1	1
hsa-miR-4486	0	0	0	0.383145	-0.130058	0.527231	0.924194	0.908413	0.811081	1	1	1
hsa-miR-4486-3p	0	0	0	0.910427	0.233602	0.670149	0.308227	0.819375	0.421912	1	1	1
hsa-miR-4487	0	0	0	0.686061	-0.199961	0.892333	0.312961	0.74994	0.132112	1	1	1
hsa-miR-4487-5p	0	0	0	0.172053	0.0921567	0.0809014	1	0.871749	1	1	1	1
hsa-miR-4488	0	0	0	0.0958995	0.0214193	0.0732769	1	1	1	1	1	1
hsa-miR-4488-3p	1.32449	1.19665	1.50281	0.30285	-0.00834252	0.333717	0.353466	0.979872	0.395611	1	1	1
hsa-miR-4489	0	0	0	0.465023	0.582073	-0.101075	0.970914	0.842918	0.903418	1	1	1
hsa-miR-4489-3p	0	0.520696	0.189117	0.1108	0.254747	-0.117268	0.836224	0.611468	0.836831	1	1	1
hsa-miR-4490	0	0	0	0.0402316	-0.0501323	0.0921961	1	0.954936	1	1	1	1
hsa-miR-4490-5p	0	0	0	0.312967	0.0934352	0.238255	1	0.936936	1	1	1	1
hsa-miR-4491	0	0	0	0.407013	-0.043206	0.460704	0.783808	1	0.853024	1	1	1
hsa-miR-4491-5p	0	0	0	0.31009	-0.12451	0.441708	0.920803	0.907375	0.808707	1	1	1
hsa-miR-4492	4.78988	4.2197	4.35364	0.0697027	-0.0251287	0.0591079	0.765577	0.909582	0.791786	1	1	1
hsa-miR-4492-5p	0.62114	0.935395	0	-0.279105	0.0160188	-0.305953	0.450292	0.968243	0.381502	1	1	1
hsa-miR-4493	0	0	0	0.172987	0.24319	-0.0505421	1	0.750776	0.888723	1	1	1
hsa-miR-4493-5p	0	0	0	0.232161	0.0162953	0.229977	1	1	1	1	1	1
hsa-miR-4494	0	0	0	0.0900049	-0.337258	0.36227	1	0.587481	1	1	1	1
hsa-miR-4494-5p	0	0	0	0.31197	0.224884	0.0776592	0.680525	0.745419	0.904097	1	1	1
hsa-miR-4495	0	0	0	NA	0.0941358	0.239175	NA	0.944045	1	NA	1	1
hsa-miR-4495-3p	0	0	0	0.378395	0.154553	0.228315	0.940706	0.941922	1	1	1	1
hsa-miR-4496	0	0	0	0.0885669	-0.202616	0.31173	1	0.877481	1	1	1	1
hsa-miR-4496-5p	0	0	0	0.190011	-0.350223	0.490304	1	0.568388	0.654369	1	1	1
hsa-miR-4497	0	0	0	0.356256	-0.0160956	0.389331	0.480628	0.969093	0.385788	1	1	1
hsa-miR-4497-3p	1.93351	2.23543	1.48806	-0.287632	0.35611	-0.62652	0.28186	0.190307	0.0316609	1	1	1
hsa-miR-4498	0	0	0	0.314757	-0.0537366	0.376376	0.970749	0.973158	0.923301	1	1	1
hsa-miR-4498-3p	1.48907	1.98163	1.74008	-0.0848468	0.227575	-0.317103	0.775736	0.380607	0.291828	1	1	1
hsa-miR-4499	0	0	0	0.259235	0.382408	-0.0344	1	0.879969	0.959454	1	1	1
hsa-miR-4499-3p	0.823341	0.7374	0.986152	0.437348	0.23482	0.253085	0.236093	0.552591	0.49176	1	1	1
hsa-miR-449a	0	0	0	0.22964	0.0265477	0.232336	1	1	0.909434	1	1	1
hsa-miR-449a-3p	0	0	0	-0.102235	-0.32154	0.31031	0.730847	0.492333	0.659447	1	1	1
hsa-miR-449b-3p	0	0	0	0.174046	0.0868456	0.0851468	1	1	1	1	1	1
hsa-miR-449b-5p	3.25385	3.16133	3.12951	-0.00941791	0.162481	-0.157004	0.964508	0.444648	0.496354	1	1	1
hsa-miR-449c-3p	0	0	0	0.371627	0.304975	0.049532	1	0.808447	1	1	1	1
hsa-miR-449c-5p	0.920594	1.28082	0.628029	0.0996703	0.863487	-0.734424	0.800347	0.00767106	0.0330346	1	1	1
hsa-miR-4500	0	0	0	0.199254	-0.117203	0.321914	1	0.901339	0.868765	1	1	1
hsa-miR-4500-5p	13.541	12.7294	10.5292	-0.393678	0.0690519	-0.478868	0.269579	0.838275	0.19774	1	1	1
hsa-miR-4501	0	0	0	0.506669	-0.057637	0.584084	0.81016	0.955205	0.7534	1	1	1
hsa-miR-4501-3p	0	0	0	0.107871	0.33882	-0.275138	1	0.583746	0.525061	1	1	1
hsa-miR-4502	0	0	0	0.495201	0.021325	0.455465	0.819185	1	0.815418	1	1	1
hsa-miR-4502-5p	0	0	0	0.392115	0.298018	0.107608	1	0.861486	1	1	1	1
hsa-miR-4503	0	0	0	0.40452	-0.0444208	0.455559	0.905598	0.960425	0.848695	1	1	1
hsa-miR-4503-3p	0	0	0	0.243096	0.165297	0.0990058	1	0.897332	1	1	1	1
hsa-miR-4504	0	0	0	-0.857983	-0.430474	-0.369194	0.070235	0.344236	0.418705	1	1	1
hsa-miR-4504-5p	3.25402	3.24659	2.61648	-0.114186	0.154549	-0.195915	0.668558	0.531457	0.434746	1	1	1
hsa-miR-4505	0	0	0	0.631678	0.514819	0.0869871	0.531679	0.413253	1	1	1	1
hsa-miR-4505-3p	0	0	0	-0.49813	-0.345736	-0.168422	0.293691	0.488034	0.69082	1	1	1
hsa-miR-4506	0	0	0	1.39717	0.311966	1.00121	0.178802	0.702978	0.353782	1	1	1
hsa-miR-4506-5p	0	0	0	0.383102	0.162128	0.244835	0.923589	0.908864	1	1	1	1
hsa-miR-4507	0	0	0	0.200426	-0.0429374	0.237366	1	1	1	1	1	1
hsa-miR-4507-5p	0	0	0	-0.221072	0.0804211	-0.260824	0.514889	0.838384	0.461759	1	1	1
hsa-miR-4508	0	0	0	0.285188	-0.20716	0.52117	1	0.854748	0.774077	1	1	1
hsa-miR-4508-3p	95.3438	95.0452	85.7531	-0.0515306	0.00297164	-0.056435	0.664209	0.97838	0.626842	1	1	1
hsa-miR-4509	0	0	0	0.331526	-0.123294	0.448981	1	0.916723	0.862935	1	1	1
hsa-miR-4509-3p	0	0	0	0.543651	0.0149093	0.531206	0.630614	0.97748	0.649543	1	1	1
hsa-miR-450a-1-3p	0	0	0	-0.985751	-0.877584	-0.0630144	0.0379205	0.0686932	0.839044	1	1	1
hsa-miR-450a-2-3p	2.75484	1.89468	1.82809	-0.39916	-0.542246	0.13815	0.129099	0.0396144	0.600102	1	1	1
hsa-miR-450a-5p	3.6525	2.10755	2.61821	-0.526473	-0.595971	0.0859581	0.0283174	0.0125168	0.715025	1	1	1
hsa-miR-450b-3p	0	0	0	NA	0.162186	0.163342	NA	0.913111	1	NA	1	1
hsa-miR-450b-5p	18.0108	18.9487	15.4144	-0.452474	-0.12924	-0.293359	0.0334398	0.509339	0.110922	1	1	1
hsa-miR-4510	0	0	0	0.121372	0.391822	-0.188342	1	0.473045	0.610811	1	1	1
hsa-miR-4510-3p	2.82494	1.71965	1.17343	-0.516791	-0.399101	-0.100213	0.0694249	0.121977	0.756182	1	1	1
hsa-miR-4511	0.990944	0.479908	0.583897	-0.355348	-0.159454	-0.160927	0.545018	0.792707	0.791499	1	1	1
hsa-miR-4511-3p	6.71531	6.67885	7.04566	0.182601	0.0828437	0.115187	0.222642	0.528423	0.443765	1	1	1
hsa-miR-4512	0.302614	0.454237	0	0.105141	0.00482902	0.169589	0.883281	0.995604	0.736379	1	1	1
hsa-miR-4512-5p	0	0	0	-0.0217701	-0.420534	0.436695	0.882271	0.46493	0.719374	1	1	1
hsa-miR-4513	0	0	0	0.203045	-0.385185	0.58142	1	0.485019	0.476327	1	1	1
hsa-miR-4513-3p	0	0	0	0.23443	-0.31226	0.647633	0.716776	0.630735	0.350121	1	1	1
hsa-miR-4514	0	0	0	0.30684	0.0774058	0.233044	0.952461	0.948961	1	1	1	1
hsa-miR-4514-3p	0	0	0	0.291431	0.15391	0.17054	1	1	0.931309	1	1	1
hsa-miR-4515	0	0	0	0.221905	-0.130107	0.386683	1	0.855153	0.789199	1	1	1
hsa-miR-4515-3p	0	0	0	-0.060665	-0.0848909	0.0111853	0.786619	0.8318	1	1	1	1
hsa-miR-4516	0	0	0	0.316505	0.172179	0.0785208	0.6942	0.800413	1	1	1	1
hsa-miR-4516-3p	1.87404	1.80519	2.14248	0.156117	-0.152269	0.298964	0.523124	0.523939	0.216091	1	1	1
hsa-miR-4517	0	0	0	0.396689	0.166591	0.238513	0.777437	1	0.795199	1	1	1
hsa-miR-4517-3p	0	0	0	0.151623	0.612248	-0.45813	1	0.237204	0.306951	1	1	1
hsa-miR-4518	0	0.52513	0	0.0478158	0.345391	-0.276323	1	0.445115	0.491754	1	1	1
hsa-miR-4518-5p	0	0	0	0.0615042	0.244675	-0.226043	1	0.708888	0.621816	1	1	1
hsa-miR-4519	0	0	0	-0.215461	-0.186084	0.0122308	0.887068	1	1	1	1	1
hsa-miR-4519-3p	0	0	0	0.679037	-0.264748	0.960988	0.256954	0.69812	0.149161	1	1	1
hsa-miR-451a	2.53453	2.81215	2.09342	-0.403353	-0.188548	-0.185198	0.190159	0.420488	0.46859	1	1	1
hsa-miR-451a-3p	6198.17	4711.76	4701.56	-0.180389	-0.186254	0.0141797	0.23003	0.209952	0.925785	1	1	1
hsa-miR-451b	466.073	363.332	360.18	-0.229615	-0.217485	-0.00115699	0.171643	0.171521	0.994473	1	1	1
hsa-miR-451b-3p	5510.59	4282.22	4505.34	-0.178807	-0.183202	0.0126704	0.235406	0.224121	0.934113	1	1	1
hsa-miR-452-3p	2.88677	3.8442	2.32209	-0.198643	0.232774	-0.385179	0.492279	0.390625	0.162256	1	1	1
hsa-miR-452-5p	85.7373	74.7884	66.6238	-0.361786	-0.014093	-0.315346	0.0691337	0.95062	0.0936894	1	1	1
hsa-miR-4520-2-3p	0	0	0	0.544118	0.451507	0.0879601	0.765181	0.753729	1	1	1	1
hsa-miR-4520-3p	0	0	0	0.172551	0.0183242	0.176617	0.935063	0.992977	0.891657	1	1	1
hsa-miR-4520-5p	0	0	0	0.395123	0.310011	0.0944533	0.663665	0.600059	1	1	1	1
hsa-miR-4521	0	0	0	0.46909	0.598505	-0.157654	0.867905	0.60189	0.783598	1	1	1
hsa-miR-4521-3p	2.99886	3.22778	2.64092	-0.0690015	-0.200072	0.135571	0.766567	0.426651	0.573006	1	1	1
hsa-miR-4522	0.622092	0.593602	0.304014	-0.570671	-0.667824	0.173166	0.31216	0.196726	0.734728	1	1	1
hsa-miR-4522-5p	0.456603	0.522359	0	-0.039954	0.0572409	-0.122911	0.894847	0.889125	0.768853	1	1	1
hsa-miR-4523	0	0	0	0.238437	0.0172545	0.232375	1	0.992703	1	1	1	1
hsa-miR-4523-3p	0.80683	1.33363	0.569852	-0.290305	0.133694	-0.386912	0.393928	0.686228	0.270145	1	1	1
hsa-miR-4524a-3p	0	0	0	0.105318	0.248376	-0.125012	1	0.752157	0.850991	1	1	1
hsa-miR-4524a-5p	0	0	0	NA	0.0901558	0.235516	NA	0.940068	1	NA	1	1
hsa-miR-4524b-3p	0	0	0	0.685786	-0.137365	0.832212	0.463519	0.903688	0.388482	1	1	1
hsa-miR-4524b-5p	0	0	0	0.235677	0.0214052	0.251367	1	1	0.939242	1	1	1
hsa-miR-4525	0	0	0	0.505049	0.176329	0.331313	0.557162	0.775165	0.685346	1	1	1
hsa-miR-4525-3p	0	0	0	0.185989	-0.143344	0.366654	1	0.779318	0.899558	1	1	1
hsa-miR-4526	0	0	0	0.237331	0.169108	0.102392	0.91064	0.818652	1	1	1	1
hsa-miR-4526-5p	0	0	0	0.527531	-0.0501733	0.605392	0.408824	0.866654	0.311511	1	1	1
hsa-miR-4527	0	0	0	0.641903	0.409867	0.218041	0.289389	0.394789	0.720524	1	1	1
hsa-miR-4527-3p	0.62114	0.625459	0.834507	0.11687	-0.0359643	0.207226	0.819358	0.944952	0.649836	1	1	1
hsa-miR-4528	0	0	0	0.544118	0.0901552	0.453181	0.762882	0.948877	0.804418	1	1	1
hsa-miR-4528-5p	0	0	0	0.172187	0.0184054	0.156612	1	1	1	1	1	1
hsa-miR-4529-3p	0	0	0	0.230356	-0.0639406	0.322085	0.909544	1	0.890886	1	1	1
hsa-miR-4529-5p	0	0	0	0.238899	-0.0580274	0.304203	1	1	1	1	1	1
hsa-miR-4530	0	0	0	0.318682	-0.026125	0.376234	0.651371	1	0.649447	1	1	1
hsa-miR-4530-5p	0	0	0	0.199868	0.471567	-0.257174	1	0.525301	0.641921	1	1	1
hsa-miR-4531	0	0	0	0.556362	0.147649	0.422622	0.79461	0.893368	0.949687	1	1	1
hsa-miR-4531-5p	3.87979	4.74752	4.38425	0.0962266	-0.00631025	0.167272	0.675897	0.978758	0.416642	1	1	1
hsa-miR-4533	0	0	0	0.320684	-0.0538549	0.38068	1	0.899004	0.79555	1	1	1
hsa-miR-4533-3p	3.99249	5.89592	6.12132	0.411263	0.405916	-0.0130943	0.0634986	0.0318628	0.94331	1	1	1
hsa-miR-4534	0	0	0	0.203631	-0.183953	0.399519	1	0.842454	0.918513	1	1	1
hsa-miR-4534-5p	0	0	0	0.734591	0.246738	0.542122	0.475291	0.744716	0.661207	1	1	1
hsa-miR-4535	1.63085	2.0708	0.849855	-0.147208	-0.115971	0.0765264	0.816756	0.80849	0.876772	1	1	1
hsa-miR-4535-5p	0.572103	0.198769	0.873589	0.761465	0.114068	0.642227	0.0592508	0.801765	0.113411	1	1	1
hsa-miR-4536-3p	0	0	0	0.175481	0.126956	0.0206832	1	0.745345	1	1	1	1
hsa-miR-4536-5p	0	0	0	0.223915	-0.553511	0.78107	0.852453	0.283856	0.264803	1	1	1
hsa-miR-4537	0	0	0	0.230069	-0.353164	0.592353	1	0.663326	0.652112	1	1	1
hsa-miR-4537-3p	0	0	0	0.300154	-0.246104	0.554857	0.573484	0.581149	0.230919	1	1	1
hsa-miR-4538	0	0	0	-0.162969	0.280128	-0.374647	0.641338	0.644492	0.433278	1	1	1
hsa-miR-4538-3p	0.945744	0.621284	0.622072	0.303015	-0.211416	0.524628	0.434206	0.553565	0.161223	1	1	1
hsa-miR-4539	0	0	0	-0.216663	0.208151	-0.355545	0.589854	0.894815	0.615347	1	1	1
hsa-miR-4539-5p	0	0	0	0.148035	0.466765	-0.273246	1	0.437631	0.607361	1	1	1
hsa-miR-454-3p	250.17	249.5	246.036	-0.0281971	-0.0077647	-0.0223797	0.824118	0.951329	0.858125	1	1	1
hsa-miR-454-5p	40.1703	39.7045	39.5799	0.00830454	0.0554352	-0.0411486	0.912086	0.479409	0.585747	1	1	1
hsa-miR-4540	0	0	0	0.551206	0.33205	0.20219	0.727292	0.793	0.883513	1	1	1
hsa-miR-4540-5p	0	0	0	0.522959	0.476115	0.0544533	0.379044	0.412812	1	1	1	1
hsa-miR-455-3p	0	0	0	-0.340746	0.495306	-0.737361	0.612985	0.695779	0.57745	1	1	1
hsa-miR-455-5p	1.10701	0.847739	1.24083	0.186709	-0.293885	0.478279	0.59061	0.391189	0.166291	1	1	1
hsa-miR-4632-3p	0	0	0	0.0848845	0.0333859	0.0845089	1	0.957034	1	1	1	1
hsa-miR-4632-5p	0	0	0	0.476102	0.293865	0.179513	0.76868	0.797186	0.927346	1	1	1
hsa-miR-4633-3p	0	0	0	0.166508	-0.1256	NA	1	0.940145	NA	1	1	NA
hsa-miR-4633-5p	0	0	0	0.325306	-0.00787539	0.322027	0.852765	1	0.821522	1	1	1
hsa-miR-4634	0.874721	0.743093	0.903887	-0.0962156	-0.489871	0.383195	0.801011	0.180465	0.302077	1	1	1
hsa-miR-4634-5p	0	0	0	0.149975	-0.367082	0.615171	0.895301	0.481966	0.269802	1	1	1
hsa-miR-4635	1.22599	0.537592	0.490416	-0.693806	-0.240741	-0.445889	0.0996585	0.570621	0.309827	1	1	1
hsa-miR-4635-5p	0.258867	0.52513	1.12425	0.559646	0.202969	0.296564	0.211271	0.719164	0.478123	1	1	1
hsa-miR-4636	0	0	0	0.50261	0.347309	0.0695075	0.641775	0.707995	1	1	1	1
hsa-miR-4636-3p	0.258867	0	0.22217	-0.0221015	-0.653832	0.58994	1	0.232205	0.218714	1	1	1
hsa-miR-4637	0	0	0	-0.269298	-0.409435	0.183644	0.614961	0.563594	1	1	1	1
hsa-miR-4637-5p	0	0	0	-0.164049	-0.366286	0.172029	0.606482	0.382567	1	1	1	1
hsa-miR-4638-3p	2.7277	2.25303	3.08918	0.252076	-0.0674879	0.358941	0.297997	0.781802	0.172153	1	1	1
hsa-miR-4639-3p	0	0	0	0.314906	0.280772	0.0198125	0.952499	0.841255	1	1	1	1
hsa-miR-4639-5p	0.197736	0.829222	0.583897	0.312044	0.558156	-0.220701	0.506577	0.181908	0.592238	1	1	1
hsa-miR-4640-3p	0	0	0	0.390154	-0.0581956	0.452408	0.917378	0.972894	0.87049	1	1	1
hsa-miR-4640-5p	0	0	0	0.0512212	0.16378	-0.135433	1	0.773965	0.715602	1	1	1
hsa-miR-4641	0	0	0	0.599335	0.161807	0.435685	0.640929	0.834116	0.758673	1	1	1
hsa-miR-4641-5p	0	0	0	0.163356	0.0102063	0.163706	1	1	1	1	1	1
hsa-miR-4642	0	0	0	0.623721	0.165721	0.444836	0.566276	0.856971	0.652799	1	1	1
hsa-miR-4642-3p	0.478308	0.229028	0	-0.366978	-0.427761	0.0164747	0.459842	0.354614	1	1	1	1
hsa-miR-4643	0	0	0	0.32249	0.0966082	0.238475	0.933455	0.944777	1	1	1	1
hsa-miR-4643-5p	0	0	0	0.390919	0.018294	0.379913	0.857009	1	0.833295	1	1	1
hsa-miR-4644	0	0	0	1.42514	0.494071	0.991513	0.0329635	0.384465	0.133832	1	1	1
hsa-miR-4644-5p	0	0.507734	0	0.347401	0.437402	-0.0339948	0.579962	0.318288	0.871734	1	1	1
hsa-miR-4645-3p	11.3055	10.1324	12.6181	0.0378168	-0.102813	0.130702	0.773599	0.397658	0.341851	1	1	1
hsa-miR-4645-5p	0	0	0	0.449507	-0.0537372	0.520356	0.905485	0.963567	0.840597	1	1	1
hsa-miR-4646-3p	0	0	0	0.737863	-0.0809049	0.886088	0.230783	0.862929	0.201828	1	1	1
hsa-miR-4646-5p	0.945744	0.689277	0.683684	-0.347997	-0.542221	0.178056	0.333714	0.127816	0.637194	1	1	1
hsa-miR-4647	0.90257	0.423978	0	-0.288787	-0.333416	0.0299854	0.430052	0.393334	1	1	1	1
hsa-miR-4647-3p	0.619832	1.24439	0.262062	-0.202128	0.254642	-0.437534	0.64927	0.492402	0.255215	1	1	1
hsa-miR-4648	0	0	0	0.166792	0.0885928	0.0806862	1	0.894656	1	1	1	1
hsa-miR-4648-3p	0	0	0	0.320544	0.0078428	0.29215	0.894085	0.969392	1	1	1	1
hsa-miR-4649-3p	0	0	0	0.378622	0.385708	0.0102624	0.863789	0.583748	1	1	1	1
hsa-miR-4649-5p	0	0	0	0.631706	0.0992157	0.556625	0.490664	0.905631	0.525395	1	1	1
hsa-miR-4650-3p	0	0	0	0.0422797	-0.303645	0.331276	1	0.586236	0.819497	1	1	1
hsa-miR-4650-5p	0	0	0	0.699389	0.0247464	0.680718	0.572694	0.991636	0.579723	1	1	1
hsa-miR-4651	0	0	0	0.285447	0.0706103	0.239395	0.927633	0.937901	1	1	1	1
hsa-miR-4651-3p	0	0	0	0.658589	0.162078	0.598092	0.408303	0.775017	0.501824	1	1	1
hsa-miR-4652-3p	0	0	0	0.966362	-0.0546054	1.00823	0.714038	0.961974	0.691133	1	1	1
hsa-miR-4652-5p	0	0	0	0.222669	-0.126913	0.380158	1	0.903637	1	1	1	1
hsa-miR-4653-3p	0	0	0	0.368764	0.236406	0.138577	1	0.726607	1	1	1	1
hsa-miR-4653-5p	0	0	0	0.387428	0.230875	0.159892	0.892047	0.86349	1	1	1	1
hsa-miR-4654	0	0	0	0.472779	0.0943046	0.383342	0.867584	0.938634	0.977132	1	1	1
hsa-miR-4654-3p	4.75128	5.90031	5.3519	-0.0865138	0.182602	-0.279216	0.647409	0.293581	0.149195	1	1	1
hsa-miR-4655-3p	0	0	0	-0.117201	-0.272976	0.167518	0.875863	0.77232	1	1	1	1
hsa-miR-4655-5p	0	0	0	0.0584006	-0.376929	0.439323	1	0.418188	0.443704	1	1	1
hsa-miR-4656	0	0	0	-0.0081066	-0.231607	0.242236	0.973419	1	1	1	1	1
hsa-miR-4656-3p	0	0.787745	0.224577	0.479838	0.492219	-0.0899262	0.341371	0.24009	0.815691	1	1	1
hsa-miR-4657	0	0	0	NA	0.086814	0.235361	NA	0.942053	1	NA	1	1
hsa-miR-4657-3p	0	0	0.878403	0.474272	-0.521079	0.852505	0.27503	0.260635	0.0350257	1	1	1
hsa-miR-4658	0	0	0	0.402018	0.230028	0.209365	0.833658	0.773738	0.912822	1	1	1
hsa-miR-4658-5p	0	0	0	0.768278	0.0880901	0.679939	0.503863	0.886667	0.584824	1	1	1
hsa-miR-4659a-3p	8.94962	9.87715	11.1869	0.207832	0.0804786	0.117594	0.0822778	0.463326	0.288577	1	1	1
hsa-miR-4659a-5p	0	0	0	0.0408372	-0.0307847	0.0957488	1	0.926142	1	1	1	1
hsa-miR-4659b-3p	37.1678	37.4036	39.7907	0.104168	0.0507964	0.04394	0.243009	0.539349	0.591328	1	1	1
hsa-miR-4659b-5p	2.53453	2.60891	2.21712	0.0832592	0.100658	-0.0196503	0.729798	0.66721	0.934764	1	1	1
hsa-miR-466	0	0	0	0.00418458	0.159169	-0.115428	1	0.722348	0.733853	1	1	1
hsa-miR-466-5p	0	0	0	0.216139	-0.386637	0.586584	0.937191	0.828134	0.798674	1	1	1
hsa-miR-4660	0	0	0	0.112301	-0.408759	0.528715	0.988332	0.68225	0.757353	1	1	1
hsa-miR-4660-3p	0.434316	0.451805	0	0.0722989	0.371163	-0.284829	0.881095	0.38361	0.55936	1	1	1
hsa-miR-4661-3p	0	0	0	0.405499	-0.0537366	0.464753	0.929997	0.952996	0.859027	1	1	1
hsa-miR-4661-5p	3.70011	5.40806	4.42083	0.232844	0.357295	-0.179566	0.326206	0.0885871	0.392762	1	1	1
hsa-miR-4662a-3p	0	0	0	0.55481	0.0217148	0.521278	0.831956	1	0.839644	1	1	1
hsa-miR-4662a-5p	10.0773	9.76104	9.50175	-0.0687955	-0.158744	0.0754731	0.684269	0.320393	0.648899	1	1	1
hsa-miR-4662b	0	0	0	0.311205	-0.133434	0.452099	0.931891	0.911044	0.820548	1	1	1
hsa-miR-4662b-5p	5.082	4.93046	4.93455	0.0180831	-0.143369	0.136514	0.928752	0.460927	0.507724	1	1	1
hsa-miR-4663	0	0	0	-0.10916	-0.597403	0.47554	0.811142	0.254531	0.488707	1	1	1
hsa-miR-4663-3p	0	0	0	0.50682	-0.0869184	0.618734	0.35904	1	0.249512	1	1	1
hsa-miR-4664-3p	3.99544	5.70621	4.46665	0.12279	0.404142	-0.301161	0.545787	0.0353622	0.147022	1	1	1
hsa-miR-4664-5p	0	0	0	0.23893	0.155908	0.0840935	1	1	1	1	1	1
hsa-miR-4665-3p	0	0	0	0.0334009	-0.198637	0.25023	1	0.839008	1	1	1	1
hsa-miR-4665-5p	22.3525	24.3713	23.7766	0.145944	0.195361	-0.0550102	0.253757	0.0857613	0.614393	1	1	1
hsa-miR-4666a-3p	0	0	0	0.33334	-0.127195	0.458688	0.877124	0.92476	0.803877	1	1	1
hsa-miR-4666a-5p	0	0	0	-0.163437	-0.822184	0.608409	0.610671	0.124364	0.580765	1	1	1
hsa-miR-4666b	0	0	0	0.857224	NA	0.844609	0.748929	NA	0.757236	1	NA	1
hsa-miR-4666b-3p	0	0	0	0.509637	0.0469447	0.447305	1	1	0.901801	1	1	1
hsa-miR-4667-3p	0	0	0	0.167821	-0.0482331	0.238255	1	0.957237	1	1	1	1
hsa-miR-4667-5p	0.496358	0.782052	0	-0.742844	-0.0450078	-0.755112	0.0836197	0.940131	0.0864597	1	1	1
hsa-miR-4668-5p	0	0	0	0.375438	0.0894564	0.300177	0.631101	0.860803	0.764964	1	1	1
hsa-miR-4669	1.63267	1.24546	1.30344	-0.134143	-0.154385	0.027735	0.64808	0.590628	0.948655	1	1	1
hsa-miR-4669-5p	0	0	0	-0.246331	-0.261516	0.0597429	0.518412	0.605225	1	1	1	1
hsa-miR-4670-3p	1.01186	0.982653	0.189117	0.644598	0.425162	0.227487	0.222421	0.331245	0.659655	1	1	1
hsa-miR-4670-5p	0	0	0	0.112318	-0.190817	0.321297	1	0.839041	0.876876	1	1	1
hsa-miR-4671-3p	0	0	0	0.305112	-0.133399	0.448981	1	0.917127	0.870715	1	1	1
hsa-miR-4671-5p	2.98312	3.6339	3.886	0.16076	0.437536	-0.266056	0.553983	0.0696686	0.302729	1	1	1
hsa-miR-4672	0	0	0	0.0527143	-0.25251	0.30375	1	0.776683	1	1	1	1
hsa-miR-4672-5p	0	0	0	0.293157	0.488458	-0.162417	1	0.361152	0.61659	1	1	1
hsa-miR-4673	0	0	0	0.549598	0.0971674	0.466726	0.801312	0.972817	0.808679	1	1	1
hsa-miR-4673-3p	0	0	0	0.073429	0.0757948	0.028663	1	1	1	1	1	1
hsa-miR-4674	0	0	0	-0.160207	-0.0544945	-0.0681013	0.636038	0.904169	0.816199	1	1	1
hsa-miR-4674-5p	0	0	0	0.504901	0.510183	-0.0184186	0.700997	0.459221	0.912728	1	1	1
hsa-miR-4675	0	0	0	0.316698	0.0792071	0.232415	0.936034	0.936561	1	1	1	1
hsa-miR-4675-5p	0	0	0	0.247744	-0.196099	0.452699	1	0.884099	0.889457	1	1	1
hsa-miR-4676-3p	6.14542	6.41921	6.29657	-0.0445422	-0.0531334	0.0217226	0.754451	0.71583	0.884474	1	1	1
hsa-miR-4676-5p	1.76684	1.10539	1.25714	-0.43098	-0.476239	0.103836	0.162176	0.105248	0.755639	1	1	1
hsa-miR-4677-3p	14.0402	13.2021	12.7762	-0.0600246	-0.132446	0.0742099	0.644213	0.25896	0.54112	1	1	1
hsa-miR-4677-5p	0.692847	0.988425	0	0.314713	0.371859	-0.0390736	0.485206	0.290116	0.892559	1	1	1
hsa-miR-4678	0	0	0	0.285777	-0.0959924	0.397164	1	0.829334	0.653866	1	1	1
hsa-miR-4678-3p	0.236581	0	0	-0.403713	0.466702	-0.802611	0.323051	0.38675	0.121752	1	1	1
hsa-miR-4679	0	0	0	0.32649	0.0241885	0.321914	0.914262	0.968148	0.972241	1	1	1
hsa-miR-4679-3p	0	0	0	0.20386	0.218907	-0.0464554	0.727656	0.630229	0.88984	1	1	1
hsa-miR-4680-3p	0	0	0	0.417531	-0.0659402	0.548343	0.55448	0.852071	0.436986	1	1	1
hsa-miR-4680-5p	0	0	0	-0.0562561	0.0436087	-0.0639654	0.835595	1	0.923261	1	1	1
hsa-miR-4681	0	0	0	0.16283	-0.127026	0.308689	1	0.909547	0.939899	1	1	1
hsa-miR-4681-3p	0	0	0	-0.320841	-0.144933	-0.145856	0.488028	0.833709	0.681093	1	1	1
hsa-miR-4682	0	0	0	0.0787128	0.0147599	0.175455	1	1	1	1	1	1
hsa-miR-4682-3p	0	0	0	0.121038	0.361738	-0.235245	1	0.494705	0.587489	1	1	1
hsa-miR-4683	0	0	0	-0.0300493	0.167335	-0.184058	0.881836	0.689375	0.632072	1	1	1
hsa-miR-4683-5p	0	0	0.486639	0.772132	0.363049	0.423268	0.111463	0.758521	0.35086	1	1	1
hsa-miR-4684-3p	0	0	0	0.253429	0.0205758	0.236367	0.988147	0.974062	1	1	1	1
hsa-miR-4684-5p	0	0	0	0.0119643	-0.289108	0.304221	1	0.85154	0.93622	1	1	1
hsa-miR-4685-3p	1.83469	2.46987	2.05939	0.149115	0.549014	-0.402618	0.587635	0.0270446	0.0848308	1	1	1
hsa-miR-4685-5p	0	0	0	0.225538	-0.46193	0.697968	0.835828	0.449811	0.3315	1	1	1
hsa-miR-4686	0	0	0	0.460669	0.0796664	0.369905	0.697392	1	0.74078	1	1	1
hsa-miR-4686-3p	0	0	0	-0.265355	0.140197	-0.415619	0.583722	0.828152	0.561918	1	1	1
hsa-miR-4687-3p	1.04805	0.9876	0.817513	-0.253686	-0.375052	0.120053	0.469936	0.254792	0.759718	1	1	1
hsa-miR-4687-5p	1.24349	0.945247	1.27454	0.0393148	-0.286912	0.299312	0.889753	0.312488	0.316632	1	1	1
hsa-miR-4688	0	0	0	0.0142801	-0.195386	0.244404	1	0.874688	1	1	1	1
hsa-miR-4688-5p	2.95708	2.89722	3.25791	0.0982644	0.109259	-0.0104896	0.623277	0.555419	0.957626	1	1	1
hsa-miR-4689	0	0	0	0.566508	-0.059017	0.61567	0.591948	0.905143	0.518506	1	1	1
hsa-miR-4689-3p	0	0	0	0.370983	0.278218	0.0862708	1	0.798586	1	1	1	1
hsa-miR-4690-3p	0.980637	0.454237	0.189117	-0.55932	-0.623422	0.0609314	0.145083	0.0913414	0.89064	1	1	1
hsa-miR-4690-5p	0	0	0	0.176888	0.163594	0.00424207	0.848982	0.865992	0.991227	1	1	1
hsa-miR-4691-3p	0	0	0	-0.255278	-0.428115	-0.0104767	0.822011	0.780012	0.945872	1	1	1
hsa-miR-4691-5p	0	0	0	0.110492	-0.123126	0.2321	1	0.909402	1	1	1	1
hsa-miR-4692	0	0	0	0.345054	-0.194908	0.530936	0.93574	0.909009	0.84599	1	1	1
hsa-miR-4692-5p	0	0	0	-0.156306	-0.219194	0.087925	0.81049	0.904177	1	1	1	1
hsa-miR-4693-3p	0	0	0	0.0127077	-0.442277	0.437996	1	0.363762	0.633051	1	1	1
hsa-miR-4693-5p	0	0	0	0.369725	0.0889687	0.290677	0.887072	0.944145	1	1	1	1
hsa-miR-4694-3p	0	0	0	0.456528	NA	0.449201	0.864969	NA	0.867969	1	NA	1
hsa-miR-4694-5p	0	0	0	NA	0.0901558	0.235516	NA	0.96319	1	NA	1	1
hsa-miR-4695-3p	2.92213	2.63325	3.28942	0.121951	-0.11668	0.228229	0.555395	0.572814	0.261031	1	1	1
hsa-miR-4695-5p	0	0	0	0.187681	-0.165468	0.35009	1	0.797085	0.833312	1	1	1
hsa-miR-4696	0	0	0	0.231565	0.08552	0.172008	1	0.944733	1	1	1	1
hsa-miR-4696-3p	0	0	0	0.242481	-0.0602223	0.323997	1	0.871749	0.785554	1	1	1
hsa-miR-4697-3p	0	0	0	0.517805	-0.123769	0.63626	0.565256	0.946762	0.503791	1	1	1
hsa-miR-4697-5p	0	0	0	0.103573	-0.118841	0.225222	1	0.8993	1	1	1	1
hsa-miR-4698	0	0	0	0.239158	0.320104	-0.0860263	1	0.738642	0.848123	1	1	1
hsa-miR-4698-5p	0	0	0	0.244984	-0.141719	0.386308	0.972829	1	1	1	1	1
hsa-miR-4699-3p	0	0	0	0.524595	-0.0581956	0.58865	0.801456	0.952656	0.747974	1	1	1
hsa-miR-4699-5p	0	0	0	-0.0896542	-0.0300916	-0.0602803	0.842696	1	0.856552	1	1	1
hsa-miR-4700-3p	0	0	0	0.452694	0.454241	0.0541808	0.772132	0.602956	1	1	1	1
hsa-miR-4700-5p	0	0	0	-0.197567	-0.457216	0.257609	0.615264	0.428249	0.854085	1	1	1
hsa-miR-4701-3p	0	0	0	0.356082	-0.0728597	0.329808	0.455236	0.854255	0.494049	1	1	1
hsa-miR-4701-5p	3.78002	3.41684	4.42162	0.22675	-0.0309523	0.258597	0.309835	0.895874	0.28263	1	1	1
hsa-miR-4703-3p	0	0	0	0.341663	0.0925475	0.250646	0.887292	0.859079	1	1	1	1
hsa-miR-4703-5p	0	0	0	0.0399482	0.402562	-0.288637	1	0.78869	0.82672	1	1	1
hsa-miR-4704-3p	0	0	0	0.326157	0.017815	0.30781	1	0.988954	1	1	1	1
hsa-miR-4704-5p	0	0	0	0.235388	0.0299688	0.228631	0.946135	0.977992	1	1	1	1
hsa-miR-4705	0	0	0	0.112596	0.0270975	0.0987005	1	0.971962	1	1	1	1
hsa-miR-4705-3p	0	0	0	-0.428072	-0.0679175	-0.322475	0.360817	0.859677	0.533512	1	1	1
hsa-miR-4706	0	0	0	0.438405	-0.0562727	0.524361	0.781777	0.967312	0.739488	1	1	1
hsa-miR-4706-3p	0	0	0.22217	0.440742	-0.155581	0.635227	0.314754	0.743594	0.18831	1	1	1
hsa-miR-4707-3p	1.07492	0	0.310511	-0.565717	-0.677225	0.117884	0.160747	0.119486	0.816209	1	1	1
hsa-miR-4707-5p	1.11321	0.87167	0.5279	-0.302696	-0.190915	-0.140184	0.429616	0.587893	0.715785	1	1	1
hsa-miR-4708-3p	0.610257	0	0	-0.483494	-0.551769	0.0715382	0.19955	0.286364	1	1	1	1
hsa-miR-4708-5p	0	0	0	-0.063759	-0.234703	0.163533	0.941615	0.874341	1	1	1	1
hsa-miR-4709-3p	1.04706	0.936852	1.08858	0.193062	0.0920478	0.160046	0.598807	0.783746	0.662423	1	1	1
hsa-miR-4709-5p	1.15783	1.91943	1.51466	0.349662	0.487492	-0.168393	0.242385	0.0769743	0.566472	1	1	1
hsa-miR-4710	0	0	0	0.170317	0.0101028	0.163378	1	0.987863	1	1	1	1
hsa-miR-4710-3p	0.639313	0.830225	0.838878	0.237441	0.16109	0.0272489	0.61404	0.712236	0.950076	1	1	1
hsa-miR-4711-3p	0	0	0	0.690653	0.0862554	0.607872	0.719669	0.962168	0.695712	1	1	1
hsa-miR-4711-5p	0	0	0	0.173393	-0.0592428	0.240319	0.953159	1	0.973524	1	1	1
hsa-miR-4712-3p	0	0	0	0.617983	0.297989	0.308461	0.624768	0.637492	1	1	1	1
hsa-miR-4712-5p	0	0	0	0.531684	NA	0.516141	0.854408	NA	0.858194	1	NA	1
hsa-miR-4713-3p	0	0	0	0.262245	-0.119534	0.378336	1	0.914421	0.879495	1	1	1
hsa-miR-4713-5p	0	0	0	0.470506	0.162185	0.310701	0.851803	0.921183	1	1	1	1
hsa-miR-4714-3p	0	0	0	0.182832	-0.0914166	0.29769	1	0.852386	1	1	1	1
hsa-miR-4714-5p	0	0	0	0.157893	-0.211888	0.396421	1	0.83929	0.852722	1	1	1
hsa-miR-4715-3p	0	0	0	0.611901	-0.0617596	0.679518	0.634024	0.958982	0.597791	1	1	1
hsa-miR-4715-5p	0	0	0.22217	0.46784	-0.0976135	0.716424	0.331926	0.856028	0.137262	1	1	1
hsa-miR-4716-3p	0.236581	0	0	0.157916	0.135818	0.0126438	0.805095	0.744772	1	1	1	1
hsa-miR-4716-5p	0	0	0	0.600381	0.0853867	0.507813	0.799388	0.977692	0.777349	1	1	1
hsa-miR-4717-3p	1.93145	1.6102	2.01753	0.122842	-0.253686	0.340824	0.653895	0.311516	0.200779	1	1	1
hsa-miR-4717-5p	0	0	0	0.179288	0.0945092	0.0795375	1	0.880982	1	1	1	1
hsa-miR-4718	0	0	0	0.189528	0.023879	0.17087	1	0.968103	1	1	1	1
hsa-miR-4718-3p	0	0.448973	0	0.670471	0.844455	-0.194638	0.219679	0.109314	0.686347	1	1	1
hsa-miR-4719	0.863302	0	0.486639	-0.0782832	-0.356919	0.226075	0.889727	0.552095	0.739024	1	1	1
hsa-miR-4719-5p	0	0	0	0.396796	0.232644	0.175216	0.83974	0.91498	0.916098	1	1	1
hsa-miR-4720-3p	0	0	0	0.315206	0.018294	0.304375	1	1	0.950189	1	1	1
hsa-miR-4720-5p	0	0	0	0.455845	0.0869828	0.37643	0.861512	0.964042	0.883195	1	1	1
hsa-miR-4721	0	0	0	0.561914	0.726889	-0.17742	0.499039	0.190908	0.64211	1	1	1
hsa-miR-4721-5p	0	0	0	-0.0138213	0.113205	-0.124485	0.966604	0.81287	0.782037	1	1	1
hsa-miR-4722-3p	0	0	0	0.287744	-0.263985	0.533791	1	0.820643	0.831985	1	1	1
hsa-miR-4722-5p	0	0	0	0.609669	0.233358	0.3815	0.513998	0.688021	0.801219	1	1	1
hsa-miR-4723-3p	0	0	0	0.327768	0.527171	-0.217549	0.928703	0.497145	0.688595	1	1	1
hsa-miR-4723-5p	0	0	0	0.66938	-0.670094	1.30015	0.248757	0.161134	0.0272061	1	1	1
hsa-miR-4724-3p	0	0	0	NA	0.306875	0.0121626	NA	0.866296	1	NA	1	1
hsa-miR-4724-5p	0	0	0	-0.508964	-0.746068	0.229973	0.252876	0.103063	0.729437	1	1	1
hsa-miR-4725-3p	0	0	0	0.199925	-0.212057	0.39723	0.832008	0.820333	0.730077	1	1	1
hsa-miR-4725-5p	0	0	0	0.179512	0.0923187	0.0950008	1	0.965228	1	1	1	1
hsa-miR-4726-3p	0	0	0	0.315206	0.0943039	0.2321	1	0.964906	1	1	1	1
hsa-miR-4726-5p	1.07932	0.983411	0.996271	0.12821	-0.31091	0.520218	0.7236	0.360071	0.136138	1	1	1
hsa-miR-4727-3p	0	0	0	0.127411	-0.148526	0.295345	1	0.763407	0.923622	1	1	1
hsa-miR-4727-5p	0	0	0	0.328149	0.306547	0.012411	1	0.869352	1	1	1	1
hsa-miR-4728-3p	0	0	0	0.24958	0.219731	0.015709	1	0.81339	1	1	1	1
hsa-miR-4728-5p	0	0	0	0.262942	-0.232934	0.471883	0.813457	0.834826	0.755301	1	1	1
hsa-miR-4729	0	0	0	0.483716	0.796988	-0.340721	0.753346	0.363749	0.699571	1	1	1
hsa-miR-4729-3p	0	0	0	0.337172	-0.104831	0.419999	0.860513	0.807173	0.643186	1	1	1
hsa-miR-4730	0	0	0	0.387302	0.169318	0.247487	0.7709	0.817648	0.949746	1	1	1
hsa-miR-4730-3p	0	0	0	0.143448	-0.12004	0.244992	1	0.813573	1	1	1	1
hsa-miR-4731-3p	0	0	0	NA	0.0901552	0.2321	NA	0.948877	1	NA	1	1
hsa-miR-4731-5p	0	0	0	0.308677	0.0840801	0.234818	1	0.9319	1	1	1	1
hsa-miR-4732-3p	1.0723	1.12718	1.66533	0.175295	0.237943	-0.105324	0.628553	0.537001	0.770937	1	1	1
hsa-miR-4732-5p	4.01174	4.23107	4.87948	0.0106981	0.0336968	0.00593328	0.961667	0.882839	0.978983	1	1	1
hsa-miR-4733-3p	0	0	0	0.246434	0.0211569	0.240146	1	0.977087	1	1	1	1
hsa-miR-4733-5p	0	0	0	0.476971	0.0930496	0.393423	0.794595	0.933817	0.834934	1	1	1
hsa-miR-4734	0	0	0	-0.131589	-0.410884	0.284836	0.677589	0.471479	1	1	1	1
hsa-miR-4734-5p	1.28112	0.881884	0.446747	-0.559606	-0.485042	-0.0565107	0.11815	0.128213	0.882566	1	1	1
hsa-miR-4735-3p	0	0	0	0.181403	-0.123294	NA	1	0.922769	NA	1	1	NA
hsa-miR-4735-5p	0	0	0	0.251746	-0.123295	0.379965	0.940394	0.925677	0.844609	1	1	1
hsa-miR-4736	0	0	0	0.456156	0.162744	0.300734	0.861044	0.912501	1	1	1	1
hsa-miR-4736-3p	0	0	0	0.257423	-0.269038	0.522486	0.966984	0.81692	0.785632	1	1	1
hsa-miR-4737	0	0	0	-0.485872	0.313474	-0.690305	0.302826	1	0.36598	1	1	1
hsa-miR-4737-3p	0	0.49287	0	-0.257192	-0.0611294	-0.214061	0.706658	0.932955	0.735765	1	1	1
hsa-miR-4738-3p	3.96573	4.06289	3.64086	0.112255	0.0976879	-0.0242221	0.539839	0.596881	0.893971	1	1	1
hsa-miR-4738-5p	0	0	0	0.254651	-0.264156	0.516091	1	0.861377	0.832036	1	1	1
hsa-miR-4739	0.236581	0	0	-0.135004	-0.246219	0.175741	0.640598	0.555767	0.791687	1	1	1
hsa-miR-4739-3p	0	0	0	0.138127	-0.041396	0.157456	1	0.908022	1	1	1	1
hsa-miR-4740-3p	0	0	0	0.101738	0.0106368	0.0893343	1	0.983282	1	1	1	1
hsa-miR-4740-5p	0	0	0	0.576139	-0.0695205	0.623255	0.640146	0.964098	0.636807	1	1	1
hsa-miR-4741	0	0	0	0.456149	0.0812994	0.378868	0.50569	0.92069	0.475507	1	1	1
hsa-miR-4741-5p	1.26495	1.36565	1.3264	0.0648411	-0.147761	0.256179	0.840898	0.608476	0.417977	1	1	1
hsa-miR-4742-3p	1.52907	2.06449	1.71271	0.214902	0.111238	0.116019	0.479554	0.680811	0.649493	1	1	1
hsa-miR-4742-5p	7.41219	7.56197	6.31022	-0.0391779	0.136033	-0.185145	0.812283	0.385628	0.209701	1	1	1
hsa-miR-4743-3p	0	0	0	-0.0572299	-0.18782	0.0833378	0.900308	0.871142	1	1	1	1
hsa-miR-4743-5p	2.06378	1.94852	1.68253	-0.0408358	-0.0517151	0.00839223	0.877952	0.835137	0.974589	1	1	1
hsa-miR-4744	0	0	0	0.458324	0.0907144	0.37289	0.858484	0.959327	0.903144	1	1	1
hsa-miR-4744-3p	0	0	0	0.284399	-0.135618	0.485373	1	0.811631	0.842144	1	1	1
hsa-miR-4745-3p	0	0	0	0.0342964	-0.11801	0.165923	1	0.879453	1	1	1	1
hsa-miR-4745-5p	0	0	0	0.530884	0.163273	0.402335	0.408216	0.84242	0.523637	1	1	1
hsa-miR-4746-3p	0	0	0	0.379563	0.0374109	0.364078	0.812666	0.937457	0.906575	1	1	1
hsa-miR-4746-5p	29.5928	28.8571	30.1503	0.142898	0.192145	-0.0533173	0.314486	0.17583	0.711472	1	1	1
hsa-miR-4747-3p	0	0	0	0.5328	0.2343	0.305293	0.855674	0.891827	1	1	1	1
hsa-miR-4747-5p	0	0	0	0.215598	0.0642333	0.138366	1	1	1	1	1	1
hsa-miR-4748	0.6234	0.569594	0	-0.542553	0.56855	-1.1201	0.200695	0.212648	0.0372696	1	1	1
hsa-miR-4748-3p	0.859331	0.257469	0	0.257537	-0.101805	0.322307	0.567391	0.778677	0.487573	1	1	1
hsa-miR-4749-3p	0	0	0	0.396576	0.0138351	0.38628	0.858889	1	0.856646	1	1	1
hsa-miR-4749-5p	0	0	0	-0.578278	-0.381958	-0.180364	0.18109	0.401916	0.694776	1	1	1
hsa-miR-4750-3p	0	0	0	0.515526	0.485147	0.0405381	0.485072	0.397262	1	1	1	1
hsa-miR-4750-5p	3.59806	5.81845	3.98502	0.0458579	0.396916	-0.363604	0.815677	0.0301554	0.0583079	1	1	1
hsa-miR-4751	0	0	0	0.643316	0.395649	0.284738	0.49221	0.498679	1	1	1	1
hsa-miR-4751-3p	0	0	0	0.418973	0.584025	-0.187629	0.734644	0.370417	0.701734	1	1	1
hsa-miR-4752	0	0	0	0.533298	0.230565	0.312835	0.849887	0.869702	1	1	1	1
hsa-miR-4752-3p	0	0	0	0.552675	0.24426	0.332407	0.681956	0.841652	0.737468	1	1	1
hsa-miR-4753-3p	0	0	0	-0.0710917	-0.248234	0.181127	0.847967	0.702011	1	1	1	1
hsa-miR-4753-5p	0	0.229028	0	0.652495	0.278097	0.413071	0.15223	0.506922	0.379928	1	1	1
hsa-miR-4754	0	0	0.566076	0.684711	0.483838	0.18204	0.107316	0.310052	0.689331	1	1	1
hsa-miR-4754-3p	1.39426	1.36822	1.9593	0.209868	-0.0554858	0.249196	0.518526	0.880516	0.498083	1	1	1
hsa-miR-4755-3p	0	0.882103	0.669981	0.38185	0.44028	0.0295037	0.412326	0.293287	1	1	1	1
hsa-miR-4755-5p	3.17009	2.43181	2.3455	-0.166448	-0.0941157	-0.140489	0.516079	0.707172	0.575658	1	1	1
hsa-miR-4756-3p	0	0	0	0.313601	0.0138345	0.304393	0.963053	0.982557	1	1	1	1
hsa-miR-4756-5p	0	0	0	0.390131	0.0900138	0.318254	0.868133	0.969697	0.867238	1	1	1
hsa-miR-4757-3p	0	0	0	-0.811263	-0.933344	0.113536	0.236623	0.189997	1	1	1	1
hsa-miR-4757-5p	0	0	0	0.00753745	-0.193589	0.218773	1	0.766205	0.977421	1	1	1
hsa-miR-4758-3p	0	0	0	0.404059	0.298378	0.0787472	0.8525	0.821233	1	1	1	1
hsa-miR-4758-5p	0	0	0	0.561061	0.112122	0.468068	0.64689	0.839483	0.800198	1	1	1
hsa-miR-4759	0	0	0	0.466687	-0.123434	0.590245	0.849236	0.89671	0.704656	1	1	1
hsa-miR-4759-3p	0	0	0	0.390241	0.389079	0.0140745	0.902689	0.691852	1	1	1	1
hsa-miR-4760-5p	0	0	0	0.0266523	-0.198888	0.2321	1	0.869813	1	1	1	1
hsa-miR-4761-3p	0	0	0	0.658515	0.332546	0.32841	0.551454	0.789955	0.74261	1	1	1
hsa-miR-4761-5p	0	0	0	0.282685	-0.212195	0.484376	0.810603	0.681972	0.558465	1	1	1
hsa-miR-4762-3p	1.93351	1.8622	1.71528	-0.170385	-0.0688045	-0.0951987	0.522639	0.788261	0.708944	1	1	1
hsa-miR-4762-5p	0	0	0	0.749295	0.158916	0.577094	0.552422	1	0.545587	1	1	1
hsa-miR-4763-3p	0	0	0	0.374771	0.269655	0.090171	0.725852	0.605239	1	1	1	1
hsa-miR-4763-5p	0	0	0	0.42974	0.344696	0.0946902	0.781692	0.562108	1	1	1	1
hsa-miR-4764-3p	0	0	0	0.310972	-0.0537372	0.379811	0.963231	0.963567	0.889115	1	1	1
hsa-miR-4764-5p	0	0	0	0.120976	-0.587838	0.699484	1	0.468873	0.521431	1	1	1
hsa-miR-4765	1.04004	0.689277	1.08609	-0.0318372	-0.336256	0.329267	0.923908	0.308231	0.374775	1	1	1
hsa-miR-4765-5p	1.10718	1.12868	0.540228	-0.374483	-0.0634473	-0.251975	0.311315	0.84643	0.475914	1	1	1
hsa-miR-4766-3p	0	0	0	0.443679	0.297339	0.13593	0.782628	0.696113	1	1	1	1
hsa-miR-4766-5p	0	0	0	0.204598	0.289753	-0.109224	1	0.626542	0.763705	1	1	1
hsa-miR-4767	0	0	0	0.525699	0.480455	0.115629	0.3625	0.441092	0.920792	1	1	1
hsa-miR-4767-3p	0	0.479232	0	0.240073	0.563003	-0.236524	1	0.229482	0.484194	1	1	1
hsa-miR-4768-3p	0	0	0	0.322958	-0.0508738	0.376549	1	0.960793	0.929107	1	1	1
hsa-miR-4768-5p	0	0	0	0.349245	-0.110537	0.460924	0.821858	0.92692	0.785876	1	1	1
hsa-miR-4769-3p	0	0	0	0.326157	0.0143936	0.31431	0.893507	0.98702	0.924059	1	1	1
hsa-miR-4769-5p	0	0	0	0.0990335	0.34767	-0.235882	1	0.578922	0.660625	1	1	1
hsa-miR-4770	0	0	0	0.420512	0.150503	0.349359	0.638354	1	0.489292	1	1	1
hsa-miR-4770-5p	0	0	0	0.321796	0.704135	-0.332395	0.655014	0.259236	0.527205	1	1	1
hsa-miR-4771	0.980637	0.922322	0.882006	1.02184	0.5324	0.58736	0.0621017	0.248083	0.252015	1	1	1
hsa-miR-4771-5p	1.7903	1.70374	1.52945	-0.309036	-0.106918	-0.150107	0.246587	0.693773	0.581438	1	1	1
hsa-miR-4772-3p	0.90257	0.280122	1.07783	0.284565	-0.30976	0.636416	0.510704	0.494819	0.159354	1	1	1
hsa-miR-4772-5p	0.945744	0.225209	0.405258	-0.0643207	-0.369383	0.290236	0.84724	0.354285	0.54495	1	1	1
hsa-miR-4773	0	0	0	-0.258333	-0.126824	-0.0544514	0.651861	0.835382	0.846451	1	1	1
hsa-miR-4773-5p	0	0	0	0.526892	0.00971249	0.530257	0.630216	0.996355	0.683742	1	1	1
hsa-miR-4774-3p	0	0	0	0.115661	-0.119145	0.235516	1	0.91379	1	1	1	1
hsa-miR-4774-5p	0	0	0	-0.379862	0.49679	-0.823925	0.319592	0.360555	0.0937941	1	1	1
hsa-miR-4775	0	0	0	0.248027	-0.357986	0.600694	1	0.717663	0.724514	1	1	1
hsa-miR-4775-3p	1.86769	1.53952	1.64468	-0.295447	-0.326609	0.040618	0.334347	0.216517	0.881059	1	1	1
hsa-miR-4776-3p	0	0	0	0.335707	0.0921331	0.237593	0.871002	1	0.893823	1	1	1
hsa-miR-4776-5p	0	0	0	0.100602	0.0142548	0.0910145	1	0.996733	1	1	1	1
hsa-miR-4777-3p	0.684427	0.512168	0	0.361844	0.0333241	0.358874	0.366706	0.925857	0.399894	1	1	1
hsa-miR-4777-5p	0	0	0	0.419018	0.237288	0.16457	0.910031	0.780306	1	1	1	1
hsa-miR-4778-3p	0	0	0	0.242964	0.0177349	0.235516	1	1	1	1	1	1
hsa-miR-4778-5p	0	0	0	0.576851	0.0971521	0.406413	0.314316	0.809608	0.483118	1	1	1
hsa-miR-4779	0	0	0	-0.186881	-0.0334296	-0.149028	0.766803	0.941054	0.742205	1	1	1
hsa-miR-4779-5p	0	0	0	-0.0282621	0.664593	-0.753458	0.929229	0.247471	0.203711	1	1	1
hsa-miR-4780	8.91691	8.18086	7.03972	-0.06713	0.0363739	-0.0632925	0.737593	0.850513	0.790039	1	1	1
hsa-miR-4780-5p	0	0	0	0.750465	0.243135	0.508641	0.405536	0.737439	0.591617	1	1	1
hsa-miR-4781-3p	2.68801	2.29111	2.19213	-0.0826065	0.0449941	-0.114007	0.709182	0.830006	0.622412	1	1	1
hsa-miR-4781-5p	0	0	0	0.173279	0.020006	0.163812	1	1	1	1	1	1
[truncated: 1,491 more rows]
